# Supplementary material for: Topological and spatial heterogeneity of gut microbiota co-abundance networks in pigs revealed by using large-scale samples
Source: Front Microbiol. 2025 Jun 25;16:1578236. doi: 10.3389/fmicb.2025.1578236 (PMC12237903; doi:10.3389/fmicb.2025.1578236)
Supplement: Supplementary file 5 [file Table_1.xlsx]

## Sheet: Sheet1
Table S1. Ingredient compositions and nutrient levels of commercial formula diets provided to experimental pigs.
Ingredient composition	Percentage (%)	Nutrient level	Percentage (%)
Maize	65.6	Digestible energy (Kcal/kg)	3150
Wheat bran	3	Crude protein	14.2
Rice bran	10	Ca	0.57
Soybean meal	12.3	Lys	0.78
Distillers dried grains with solubles	5	Met + Cys	0.52
Calcium	1.2	Thr	0.67
Dicalcium phosphate	0.45	Available P	0.18
Sodium chloride	0.45	Total P	0.56
Premixtures1	2
Total	100
1Provided the following per kg diet: vitamin A, 10000 IU; vitamin D3, 2700 IU; vitamin E, 60 mg; Choline chloride, 350 mg; Cu, 12 mg; Fe, 70 mg; Zn, 60 mg; Mn, 35 mg; Se, 0.3 mg.
