# Supplementary material for: Topological and spatial heterogeneity of gut microbiota co-abundance networks in pigs revealed by using large-scale samples
Source: Front Microbiol. 2025 Jun 25;16:1578236. doi: 10.3389/fmicb.2025.1578236 (PMC12237903; doi:10.3389/fmicb.2025.1578236)
Supplement: Supplementary file 6 [file Table_2.xlsx]

## Sheet: ileum
Supplementary Table S2. The microbial co-abundance network modules of the ileum in F6 population
name	degree	betweenness_centrality	closeness_centrality	eigenvector_centrality	module	taxa_roles	Kingdom	Phylum	Class	Order	Family	Genus	Species
Otu171	65	14	0.00766284	0.928461	M1	Peripheral nodes	k__Bacteria	p__Firmicutes	c__Bacilli	o__Lactobacillales	f__Leuconostocaceae	g__Leuconostoc	s__
Otu178	4	0	0.23025	2.13e-17	M6	Peripheral nodes	k__Bacteria	p__Proteobacteria	c__Gammaproteobacteria	o__Xanthomonadales	f__Xanthomonadaceae	g__	s__
Otu28544	3	0	0.00536564	0.0440341	M1	Peripheral nodes	k__Bacteria	p__Proteobacteria	c__Alphaproteobacteria	o__Sphingomonadales	f__Sphingomonadaceae	g__Novosphingobium	s__
Otu371	67	88	0.00777043	0.930242	M1	Peripheral nodes	k__Bacteria	p__Firmicutes	c__Bacilli	o__Lactobacillales	f__Lactobacillaceae	g__Pediococcus	s__
Otu3300	48	37	0.00700882	0.675177	M1	Peripheral nodes	k__Bacteria	p__Firmicutes	c__Bacilli	o__Lactobacillales	f__Carnobacteriaceae	g__	s__
Otu17279	65	195	0.007343	0.892402	M2	Peripheral nodes	k__Bacteria	p__Firmicutes	c__Clostridia	o__Clostridiales	f__Clostridiaceae	g__SMB53	s__
Otu19716	28	13	0.00634564	0.396029	M2	Peripheral nodes	k__Bacteria	p__Firmicutes	c__Clostridia	o__Clostridiales	f__	g__	s__
Otu26288	42	10	0.00678191	0.595833	M1	Peripheral nodes	k__Bacteria	p__Cyanobacteria	c__Chloroplast	o__Streptophyta	f__	g__	s__
Otu5009	6	561	0.00459433	0.00125279	M3	Peripheral nodes	k__Bacteria	p__Proteobacteria	c__Gammaproteobacteria	o__Pasteurellales	f__Pasteurellaceae	g__	s__
Otu29849	16	165	0.00623289	0.0637196	M2	Peripheral nodes	k__Bacteria	p__Firmicutes	c__Clostridia	o__Clostridiales	f__Clostridiaceae	g__	s__
Otu7875	4	0	0.0053124	0.010892	M2	Peripheral nodes	k__Bacteria	p__Firmicutes	c__Clostridia	o__Clostridiales	f__Lachnospiraceae	g__Epulopiscium	s__
Otu20712	6	1	0.103979	5.32e-17	M4	Peripheral nodes	k__Bacteria	p__Actinobacteria	c__Actinobacteria	o__Actinomycetales	f__Dietziaceae	g__Dietzia	s__
Otu3227	42	0	0.00675686	0.611307	M1	Peripheral nodes	k__Bacteria	p__Firmicutes	c__Bacilli	o__Lactobacillales	f__Lactobacillaceae	g__Lactobacillus	s__
Otu31300	48	22	0.00701869	0.70386	M2	Peripheral nodes	k__Bacteria	p__Firmicutes	c__Clostridia	o__Clostridiales	f__Clostridiaceae	g__SMB53	s__
Otu73	40	6	0.00691808	0.570482	M1	Peripheral nodes	k__Bacteria	p__Firmicutes	c__Bacilli	o__Lactobacillales	f__Enterococcaceae	g__	s__
Otu4499	1	0	0.00371803	7.98e-05	M5	Peripheral nodes	k__Bacteria	p__Proteobacteria	c__Gammaproteobacteria	o__Enterobacteriales	f__Enterobacteriaceae	g__	s__
Otu2428	73	132	0.0078451	0.988016	M1	Peripheral nodes	k__Bacteria	p__Firmicutes	c__Bacilli	o__Lactobacillales	f__Lactobacillaceae	g__Lactobacillus	s__Lactobacillus_brevis
Otu31530	56	56	0.00756802	0.80434	M2	Peripheral nodes	k__Bacteria	p__Firmicutes	c__Clostridia	o__Clostridiales	f__	g__	s__
Otu5952	1	0	1.82648	2.66e-18	M8	NA	k__Bacteria	p__Actinobacteria	c__Actinobacteria	o__Actinomycetales	f__Dermabacteraceae	g__Brachybacterium	s__
Otu19860	50	17	0.00706705	0.734355	M2	Peripheral nodes	k__Bacteria	p__Firmicutes	c__Clostridia	o__Clostridiales	f__	g__	s__
Otu2173	71	0	0.00772036	0.98949	M1	Peripheral nodes	k__Bacteria	p__Firmicutes	c__Bacilli	o__Lactobacillales	f__Lactobacillaceae	g__	s__
Otu31382	48	132	0.00709388	0.689194	M2	Peripheral nodes	k__Bacteria	p__Firmicutes	c__Clostridia	o__Clostridiales	f__Clostridiaceae	g__SMB53	s__
Otu4417	6	0	0.00358121	5.1e-05	M3	Peripheral nodes	k__Bacteria	p__Proteobacteria	c__Gammaproteobacteria	o__Pasteurellales	f__Pasteurellaceae	g__	s__
Otu3147	63	36	0.00763957	0.886879	M1	Peripheral nodes	k__Bacteria	p__Firmicutes	c__Bacilli	o__Lactobacillales	f__Lactobacillaceae	g__Lactobacillus	s__Lactobacillus_paralimentarius
Otu15698	2	0	0.00372989	0.000162548	M5	Peripheral nodes	k__Bacteria	p__Actinobacteria	c__Actinobacteria	o__Actinomycetales	f__Nocardiopsaceae	g__	s__
Otu122	67	304	0.00779608	0.921691	M1	Peripheral nodes	k__Bacteria	p__Firmicutes	c__Bacilli	o__Lactobacillales	f__	g__	s__
Otu31274	2	0	0.00500703	0.0161525	M2	Peripheral nodes	k__Bacteria	p__Firmicutes	c__Clostridia	o__Clostridiales	f__Peptostreptococcaceae	g__	s__
Otu2334	2	0	0.00411981	0.000195581	M3	Peripheral nodes	k__Bacteria	p__Firmicutes	c__Bacilli	o__Lactobacillales	f__Streptococcaceae	g__Streptococcus	s__
Otu433	11	280	0.00474425	0.00144606	M3	Module hubs	k__Bacteria	p__Proteobacteria	c__Gammaproteobacteria	o__Pasteurellales	f__Pasteurellaceae	g__Actinobacillus	s__
Otu19831	10	26	0.00614401	0.0798948	M2	Peripheral nodes	k__Bacteria	p__Firmicutes	c__Clostridia	o__Clostridiales	f__Clostridiaceae	g__SMB53	s__
Otu26257	2	0	0.185508	1.33e-17	M6	Peripheral nodes	k__Bacteria	p__Armatimonadetes	c__OS-L	o__	f__	g__	s__
Otu28803	40	2	0.00683679	0.562416	M1	Peripheral nodes	k__Bacteria	p__Firmicutes	c__Clostridia	o__Clostridiales	f__Clostridiaceae	g__	s__
Otu5883	1	0	1.82648	0	M8	NA	k__Bacteria	p__Actinobacteria	c__Actinobacteria	o__Actinomycetales	f__Brevibacteriaceae	g__Brevibacterium	s__Brevibacterium_aureum
Otu20562	4	0	0.0958442	1.6e-17	M4	Peripheral nodes	k__Bacteria	p__Actinobacteria	c__Actinobacteria	o__Actinomycetales	f__Corynebacteriaceae	g__Corynebacterium	s__
Otu21361	28	0	0.00627394	0.411619	M1	Peripheral nodes	k__Bacteria	p__Firmicutes	c__Clostridia	o__Clostridiales	f__Ruminococcaceae	g__Butyricicoccus	s__Butyricicoccus_pullicaecorum
Otu7916	28	0	0.00614639	0.39742	M1	Peripheral nodes	k__Bacteria	p__Proteobacteria	c__Alphaproteobacteria	o__Rickettsiales	f__mitochondria	g__	s__
Otu3110	8	18	0.00356219	8.91e-05	M3	Peripheral nodes	k__Bacteria	p__Proteobacteria	c__Gammaproteobacteria	o__Pasteurellales	f__Pasteurellaceae	g__Actinobacillus	s__
Otu31694	38	51	0.00691638	0.485498	M2	Peripheral nodes	k__Bacteria	p__Firmicutes	c__Clostridia	o__Clostridiales	f__	g__	s__
Otu1824	66	79	0.00774458	0.919984	M1	Peripheral nodes	k__Bacteria	p__Firmicutes	c__Bacilli	o__Bacillales	f__Bacillaceae	g__Bacillus	s__
Otu1822	61	65	0.00730201	0.87077	M1	Peripheral nodes	k__Bacteria	p__Firmicutes	c__Bacilli	o__Bacillales	f__Thermoactinomycetaceae	g__Thermoactinomyces	s__Thermoactinomyces_sanguinis
Otu358	9	7	0.117852	2.13e-17	M4	Peripheral nodes	k__Bacteria	p__Firmicutes	c__Bacilli	o__Lactobacillales	f__Aerococcaceae	g__Facklamia	s__
Otu19734	60	747	0.0078906	0.752969	M2	Peripheral nodes	k__Bacteria	p__Firmicutes	c__Clostridia	o__Clostridiales	f__Clostridiaceae	g__SMB53	s__
Otu1612	6	4	0.280018	7.45e-17	M6	Peripheral nodes	k__Bacteria	p__Thermi	c__Deinococci	o__Thermales	f__Thermaceae	g__Thermus	s__
Otu1611	6	0	0.264389	6.39e-17	M6	Peripheral nodes	k__Bacteria	p__Thermi	c__Deinococci	o__Thermales	f__Thermaceae	g__Thermus	s__
Otu3503	3	0	0.00354431	2.12e-05	M3	Peripheral nodes	k__Bacteria	p__Proteobacteria	c__Gammaproteobacteria	o__Pasteurellales	f__Pasteurellaceae	g__Haemophilus	s__Haemophilus_parasuis
Otu3283	22	0	0.00596226	0.321274	M1	Peripheral nodes	k__Bacteria	p__Firmicutes	c__Bacilli	o__Lactobacillales	f__Lactobacillaceae	g__Lactobacillus	s__
Otu31613	41	56	0.0071489	0.565674	M2	Peripheral nodes	k__Bacteria	p__Firmicutes	c__Clostridia	o__Clostridiales	f__Peptostreptococcaceae	g__	s__
Otu15730	14	369	0.00530645	0.0330229	M2	Peripheral nodes	k__Bacteria	p__Firmicutes	c__Clostridia	o__Clostridiales	f__Lachnospiraceae	g__	s__
Otu3193	60	87	0.00734785	0.842121	M1	Peripheral nodes	k__Bacteria	p__Firmicutes	c__Bacilli	o__Lactobacillales	f__Lactobacillaceae	g__Lactobacillus	s__
Otu3191	5	1	0.0988455	2.13e-17	M4	Peripheral nodes	k__Bacteria	p__Actinobacteria	c__Actinobacteria	o__Actinomycetales	f__Corynebacteriaceae	g__Corynebacterium	s__
Otu52	4	0	0.226106	3.19e-17	M6	Peripheral nodes	k__Bacteria	p__Firmicutes	c__Bacilli	o__Bacillales	f__Bacillaceae	g__Geobacillus	s__
Otu1107	1	0	1.73641	5.32e-18	M9	NA	k__Bacteria	p__Bacteroidetes	c__Bacteroidia	o__Bacteroidales	f__	g__	s__
Otu115	15	7	0.00618399	0.183392	M2	Peripheral nodes	k__Bacteria	p__Firmicutes	c__Bacilli	o__Bacillales	f__Staphylococcaceae	g__Staphylococcus	s__
Otu119	65	0	0.00737626	0.919593	M1	Peripheral nodes	k__Bacteria	p__Firmicutes	c__Bacilli	o__Lactobacillales	f__Leuconostocaceae	g__	s__
Otu3129	12	15	0.14449	6.39e-17	M4	Peripheral nodes	k__Bacteria	p__Firmicutes	c__Bacilli	o__Bacillales	f__Staphylococcaceae	g__Jeotgalicoccus	s__Jeotgalicoccus_psychrophilus
Otu20762	74	69	0.0078527	0.998428	M1	Peripheral nodes	k__Bacteria	p__Actinobacteria	c__Actinobacteria	o__Actinomycetales	f__Microbacteriaceae	g__Microbacterium	s__Microbacterium_maritypicum
Otu304	7	122	0.0048605	0.00520028	M5	Peripheral nodes	k__Bacteria	p__Proteobacteria	c__Gammaproteobacteria	o__Pseudomonadales	f__Pseudomonadaceae	g__Pseudomonas	s__Pseudomonas_veronii
Otu31452	69	525	0.00826396	0.911373	M2	Peripheral nodes	k__Bacteria	p__Firmicutes	c__Clostridia	o__Clostridiales	f__Clostridiaceae	g__SMB53	s__
Otu2354	6	129	0.00364465	4.99e-05	M3	Peripheral nodes	k__Bacteria	p__Proteobacteria	c__Gammaproteobacteria	o__Pasteurellales	f__Pasteurellaceae	g__Actinobacillus	s__
Otu11643	8	0	0.00541263	0.0141931	M2	Peripheral nodes	k__Bacteria	p__Firmicutes	c__Clostridia	o__Clostridiales	f__Clostridiaceae	g__Clostridium	s__Clostridium_butyricum
Otu3376	3	0	0.090278	1.6e-17	M4	Peripheral nodes	k__Bacteria	p__Firmicutes	c__Bacilli	o__Lactobacillales	f__Aerococcaceae	g__	s__
Otu596	5	0	0.0048775	0.00506607	M5	Peripheral nodes	k__Bacteria	p__Bacteroidetes	c__Bacteroidia	o__Bacteroidales	f__Bacteroidaceae	g__Bacteroides	s__
Otu31314	59	61	0.00755616	0.820382	M2	Peripheral nodes	k__Bacteria	p__Firmicutes	c__Clostridia	o__Clostridiales	f__	g__	s__
Otu24476	9	202	0.00537412	0.0241466	M2	Peripheral nodes	k__Bacteria	p__Firmicutes	c__Clostridia	o__Clostridiales	f__Lachnospiraceae	g__Epulopiscium	s__
Otu67	2	126	0.00297485	2.31e-05	M7	Peripheral nodes	k__Bacteria	p__Firmicutes	c__Bacilli	o__Lactobacillales	f__Lactobacillaceae	g__Lactobacillus	s__Lactobacillus_reuteri
Otu7774	40	1	0.00683176	0.555976	M1	Peripheral nodes	k__Bacteria	p__Bacteroidetes	c__Bacteroidia	o__Bacteroidales	f__Rikenellaceae	g__Blvii28	s__
Otu24809	1	0	0.00524017	0.0147777	M1	Peripheral nodes	k__Bacteria	p__Cyanobacteria	c__Chloroplast	o__Streptophyta	f__	g__	s__
Otu4485	12	128	0.00589663	0.0417998	M2	Peripheral nodes	k__Bacteria	p__Firmicutes	c__Bacilli	o__Turicibacterales	f__Turicibacteraceae	g__Turicibacter	s__
Otu19856	27	104	0.00664718	0.290515	M2	Peripheral nodes	k__Bacteria	p__Firmicutes	c__Clostridia	o__Clostridiales	f__Clostridiaceae	g__SMB53	s__
Otu8717	48	101	0.00697934	0.670767	M1	Peripheral nodes	k__Bacteria	p__Bacteroidetes	c__Saprospirae	o__Saprospirales	f__Chitinophagaceae	g__Sediminibacterium	s__
Otu3178	7	5	0.105636	2.13e-17	M4	Peripheral nodes	k__Bacteria	p__Firmicutes	c__Bacilli	o__Lactobacillales	f__Aerococcaceae	g__	s__
Otu19658	12	15	0.00604196	0.125597	M2	Peripheral nodes	k__Bacteria	p__Firmicutes	c__Clostridia	o__Clostridiales	f__Peptostreptococcaceae	g__	s__
Otu28564	9	0	0.00558874	0.130664	M1	Peripheral nodes	k__Bacteria	p__Proteobacteria	c__Alphaproteobacteria	o__Rhizobiales	f__Hyphomicrobiaceae	g__Rhodoplanes	s__
Otu30330	35	376	0.00703784	0.311651	M2	Peripheral nodes	k__Bacteria	p__Firmicutes	c__Clostridia	o__Clostridiales	f__Clostridiaceae	g__Clostridium	s__Clostridium_celatum
Otu31461	44	39	0.00672345	0.642541	M2	Peripheral nodes	k__Bacteria	p__Firmicutes	c__Clostridia	o__Clostridiales	f__Peptostreptococcaceae	g__	s__
Otu422	58	398	0.00789062	0.797376	M1	Peripheral nodes	k__Bacteria	p__Proteobacteria	c__Betaproteobacteria	o__Burkholderiales	f__Oxalobacteraceae	g__Ralstonia	s__
Otu1631	7	4	0.10867	5.32e-17	M4	Peripheral nodes	k__Bacteria	p__Actinobacteria	c__Actinobacteria	o__Actinomycetales	f__Corynebacteriaceae	g__Corynebacterium	s__Corynebacterium_stationis
Otu3496	16	62	0.00595265	0.0458663	M2	Peripheral nodes	k__Bacteria	p__Firmicutes	c__Bacilli	o__Turicibacterales	f__Turicibacteraceae	g__Turicibacter	s__
Otu3723	7	126	0.00604336	0.0801393	M2	Peripheral nodes	k__Bacteria	p__Proteobacteria	c__Gammaproteobacteria	o__Aeromonadales	f__Aeromonadaceae	g__	s__
Otu20175	5	1	0.249788	3.19e-17	M6	Peripheral nodes	k__Bacteria	p__Thermi	c__Deinococci	o__Thermales	f__Thermaceae	g__Meiothermus	s__
Otu19825	25	1	0.0064258	0.325055	M2	Peripheral nodes	k__Bacteria	p__Firmicutes	c__Clostridia	o__Clostridiales	f__Clostridiaceae	g__SMB53	s__
Otu15755	12	0	0.00519642	0.0330738	M2	Peripheral nodes	k__Bacteria	p__Firmicutes	c__Clostridia	o__Clostridiales	f__Clostridiaceae	g__	s__
Otu3260	26	0	0.00604049	0.383341	M1	Peripheral nodes	k__Bacteria	p__Firmicutes	c__Bacilli	o__Lactobacillales	f__Lactobacillaceae	g__Lactobacillus	s__
Otu3262	50	10	0.00727429	0.702881	M1	Peripheral nodes	k__Bacteria	p__Firmicutes	c__Bacilli	o__Lactobacillales	f__Lactobacillaceae	g__Lactobacillus	s__Lactobacillus_manihotivorans
Otu3264	2	0	0.00398514	0.000218839	M3	Peripheral nodes	k__Bacteria	p__Firmicutes	c__Bacilli	o__Lactobacillales	f__Streptococcaceae	g__Streptococcus	s__
Otu4180	69	53	0.00780095	0.951079	M1	Peripheral nodes	k__Bacteria	p__Firmicutes	c__Bacilli	o__Lactobacillales	f__Leuconostocaceae	g__Leuconostoc	s__
Otu31572	24	1	0.00629849	0.344338	M2	Peripheral nodes	k__Bacteria	p__Firmicutes	c__Clostridia	o__Clostridiales	f__	g__	s__
Otu3399	7	82	0.00584074	0.0206914	M2	Peripheral nodes	k__Bacteria	p__Firmicutes	c__Bacilli	o__Turicibacterales	f__Turicibacteraceae	g__Turicibacter	s__
Otu1393	1	0	1.73641	0	M9	NA	k__Bacteria	p__Bacteroidetes	c__Bacteroidia	o__Bacteroidales	f__	g__	s__
Otu7003	4	0	0.00359813	7.32e-05	M3	Peripheral nodes	k__Bacteria	p__Fusobacteria	c__Fusobacteriia	o__Fusobacteriales	f__Fusobacteriaceae	g__Fusobacterium	s__
Otu2861	57	3	0.00735475	0.80143	M1	Peripheral nodes	k__Bacteria	p__Firmicutes	c__Bacilli	o__Lactobacillales	f__Enterococcaceae	g__Enterococcus	s__
Otu8743	1	0	0.0039181	0.000394123	M2	Peripheral nodes	k__Bacteria	p__Firmicutes	c__Clostridia	o__Clostridiales	f__Lachnospiraceae	g__Epulopiscium	s__
Otu3103	3	0	0.00365745	2.42e-05	M3	Peripheral nodes	k__Bacteria	p__Proteobacteria	c__Gammaproteobacteria	o__Pasteurellales	f__Pasteurellaceae	g__Actinobacillus	s__
Otu168	4	296	0.00566465	0.0121926	M3	Peripheral nodes	k__Bacteria	p__Firmicutes	c__Bacilli	o__Lactobacillales	f__Streptococcaceae	g__Streptococcus	s__
Otu28439	6	1	0.00481988	0.00529401	M5	Peripheral nodes	k__Bacteria	p__Proteobacteria	c__Alphaproteobacteria	o__Rhodobacterales	f__Rhodobacteraceae	g__Phaeobacter	s__
Otu1831	40	1	0.0067881	0.564503	M1	Peripheral nodes	k__Bacteria	p__Firmicutes	c__Bacilli	o__Lactobacillales	f__Streptococcaceae	g__	s__
Otu362	41	8	0.00684227	0.577151	M1	Peripheral nodes	k__Bacteria	p__Firmicutes	c__Bacilli	o__Lactobacillales	f__Streptococcaceae	g__Lactococcus	s__
Otu30775	10	1302	0.00627706	0.0778327	M3	Peripheral nodes	k__Bacteria	p__Firmicutes	c__Clostridia	o__Clostridiales	f__Peptostreptococcaceae	g__Clostridium	s__
Otu298	5	0	0.235732	3.19e-17	M6	Peripheral nodes	k__Bacteria	p__Firmicutes	c__Bacilli	o__Bacillales	f__Bacillaceae	g__Anoxybacillus	s__Anoxybacillus_kestanbolensis
Otu2042	4	1	0.00361243	4.87e-05	M3	Peripheral nodes	k__Bacteria	p__Proteobacteria	c__Gammaproteobacteria	o__Pasteurellales	f__Pasteurellaceae	g__Pasteurella	s__Pasteurella_aerogenes
Otu15707	58	526	0.00775369	0.618521	M2	Peripheral nodes	k__Bacteria	p__Firmicutes	c__Clostridia	o__Clostridiales	f__Clostridiaceae	g__	s__
Otu31401	50	285	0.00746575	0.738452	M2	Peripheral nodes	k__Bacteria	p__Firmicutes	c__Clostridia	o__Clostridiales	f__	g__	s__
Otu3213	4	0	0.00373888	0.000335485	M5	Peripheral nodes	k__Bacteria	p__Proteobacteria	c__Gammaproteobacteria	o__Alteromonadales	f__Shewanellaceae	g__Shewanella	s__
Otu42	3	250	0.00401161	0.00110838	M7	Peripheral nodes	k__Bacteria	p__Firmicutes	c__Bacilli	o__Lactobacillales	f__Lactobacillaceae	g__Lactobacillus	s__
Otu20465	5	0	0.0969612	2.13e-17	M4	Peripheral nodes	k__Bacteria	p__Actinobacteria	c__Actinobacteria	o__Actinomycetales	f__Yaniellaceae	g__Yaniella	s__
Otu3155	7	0	0.102904	5.32e-17	M4	Peripheral nodes	k__Bacteria	p__Firmicutes	c__Bacilli	o__Lactobacillales	f__Aerococcaceae	g__	s__
Otu3150	71	13	0.00782616	0.970161	M1	Peripheral nodes	k__Bacteria	p__Firmicutes	c__Bacilli	o__Bacillales	f__Bacillaceae	g__Bacillus	s__Bacillus_flexus
Otu15662	4	111	0.0045425	0.00128595	M3	Peripheral nodes	k__Bacteria	p__Firmicutes	c__Clostridia	o__Clostridiales	f__Clostridiaceae	g__Clostridium	s__Clostridium_perfringens
Otu312	1	0	0.00522822	0.0137062	M1	Peripheral nodes	k__Bacteria	p__Firmicutes	c__Bacilli	o__Lactobacillales	f__Streptococcaceae	g__Lactococcus	s__
Otu317	19	0	0.00585165	0.278769	M1	Peripheral nodes	k__Bacteria	p__Firmicutes	c__Bacilli	o__Lactobacillales	f__Lactobacillaceae	g__Lactobacillus	s__
Otu32277	27	1170	0.00686098	0.314531	M5	Peripheral nodes	k__Bacteria	p__	c__	o__	f__	g__	s__
Otu28833	43	295	0.00727153	0.422918	M2	Peripheral nodes	k__Bacteria	p__Firmicutes	c__Clostridia	o__Clostridiales	f__Clostridiaceae	g__Clostridium	s__Clostridium_celatum
Otu20526	19	0	0.00585827	0.281712	M1	Peripheral nodes	k__Bacteria	p__Actinobacteria	c__Actinobacteria	o__Actinomycetales	f__Actinopolysporaceae	g__	s__
Otu20522	10	5	0.125423	6.39e-17	M4	Peripheral nodes	k__Bacteria	p__Actinobacteria	c__Actinobacteria	o__Actinomycetales	f__Corynebacteriaceae	g__Corynebacterium	s__
Otu20520	57	64	0.00735997	0.802605	M1	Peripheral nodes	k__Bacteria	p__Actinobacteria	c__Actinobacteria	o__Actinomycetales	f__Pseudonocardiaceae	g__Saccharopolyspora	s__
Otu1653	30	0	0.00615558	0.42208	M1	Peripheral nodes	k__Bacteria	p__Thermotogae	c__Thermotogae	o__Thermotogales	f__Thermotogaceae	g__Kosmotoga	s__Kosmotoga_mrcj
Otu3098	1	0	0.00437572	0.00119292	M2	Peripheral nodes	k__Bacteria	p__Proteobacteria	c__Gammaproteobacteria	o__Aeromonadales	f__Aeromonadaceae	g__	s__
Otu31346	64	169	0.00806316	0.871161	M2	Peripheral nodes	k__Bacteria	p__Firmicutes	c__Clostridia	o__Clostridiales	f__Clostridiaceae	g__SMB53	s__
Otu4200	3	0	0.00539953	0.0426787	M1	Peripheral nodes	k__Bacteria	p__Firmicutes	c__Bacilli	o__Lactobacillales	f__Leuconostocaceae	g__	s__
Otu15767	6	118	0.00484265	0.00522279	M5	Peripheral nodes	k__Bacteria	p__Firmicutes	c__Clostridia	o__Clostridiales	f__Ruminococcaceae	g__Faecalibacterium	s__Faecalibacterium_prausnitzii
Otu99	6	3	0.00434958	0.00149612	M3	Peripheral nodes	k__Bacteria	p__Proteobacteria	c__Gammaproteobacteria	o__Enterobacteriales	f__Enterobacteriaceae	g__Escherichia	s__Escherichia_coli
Otu90	14	9	0.0050836	0.0362027	M2	Peripheral nodes	k__Bacteria	p__Firmicutes	c__Bacilli	o__Turicibacterales	f__Turicibacteraceae	g__Turicibacter	s__
Otu1864	50	52	0.00707198	0.708317	M1	Peripheral nodes	k__Bacteria	p__Actinobacteria	c__Actinobacteria	o__Actinomycetales	f__Corynebacteriaceae	g__Corynebacterium	s__Corynebacterium_variabile
Otu7852	17	91	0.00565861	0.0498602	M2	Peripheral nodes	k__Bacteria	p__Firmicutes	c__Clostridia	o__Clostridiales	f__Lachnospiraceae	g__Epulopiscium	s__
Otu8107	2	0	0.00420283	0.00118179	M2	Peripheral nodes	k__Bacteria	p__Firmicutes	c__Clostridia	o__Clostridiales	f__Lachnospiraceae	g__Epulopiscium	s__
Otu29760	1	0	0.00373342	7.84e-05	M5	Peripheral nodes	k__Bacteria	p__Firmicutes	c__Clostridia	o__Clostridiales	f__Lachnospiraceae	g__Roseburia	s__
Otu7760	55	88	0.00739433	0.762804	M1	Peripheral nodes	k__Bacteria	p__Cyanobacteria	c__Chloroplast	o__Streptophyta	f__	g__	s__
Otu20840	62	1	0.00725775	0.893336	M1	Peripheral nodes	k__Bacteria	p__Actinobacteria	c__Actinobacteria	o__Actinomycetales	f__Microbacteriaceae	g__Microbacterium	s__
Otu20841	71	94	0.00781662	0.9744	M1	Peripheral nodes	k__Bacteria	p__Actinobacteria	c__Actinobacteria	o__Actinomycetales	f__Microbacteriaceae	g__	s__
Otu3247	20	0	0.00622539	0.289898	M1	Peripheral nodes	k__Bacteria	p__Proteobacteria	c__Betaproteobacteria	o__Burkholderiales	f__Alcaligenaceae	g__Achromobacter	s__
Otu3160	65	12	0.00764413	0.919149	M1	Peripheral nodes	k__Bacteria	p__Firmicutes	c__Bacilli	o__Lactobacillales	f__Lactobacillaceae	g__	s__
Otu28422	10	375	0.00488701	0.00525576	M5	Peripheral nodes	k__Bacteria	p__Proteobacteria	c__Alphaproteobacteria	o__Rickettsiales	f__Rickettsiaceae	g__Rickettsia	s__
Otu28425	11	3	0.00546361	0.027076	M2	Peripheral nodes	k__Bacteria	p__Firmicutes	c__Clostridia	o__Clostridiales	f__Clostridiaceae	g__	s__
Otu5873	70	142	0.00782402	0.944747	M1	Peripheral nodes	k__Bacteria	p__Actinobacteria	c__Actinobacteria	o__Actinomycetales	f__Microbacteriaceae	g__Microbacterium	s__
Otu20555	70	43	0.00782195	0.960573	M1	Peripheral nodes	k__Bacteria	p__Actinobacteria	c__Actinobacteria	o__Actinomycetales	f__Pseudonocardiaceae	g__Saccharopolyspora	s__
Otu3174	1	0	0.00372554	7.91e-05	M5	Peripheral nodes	k__Bacteria	p__Proteobacteria	c__Gammaproteobacteria	o__Vibrionales	f__Vibrionaceae	g__	s__
Otu20720	63	389	0.00823745	0.808116	M2	Peripheral nodes	k__Bacteria	p__Actinobacteria	c__Actinobacteria	o__Actinomycetales	f__Nocardiaceae	g__Rhodococcus	s__
Otu342	71	0	0.0076761	1	M1	Peripheral nodes	k__Bacteria	p__Firmicutes	c__Bacilli	o__Lactobacillales	f__Lactobacillaceae	g__	s__
Otu8809	43	24	0.0067855	0.6134	M1	Peripheral nodes	k__Bacteria	p__Bacteroidetes	c__Bacteroidia	o__Bacteroidales	f__Prevotellaceae	g__Prevotella	s__
Otu3335	43	12	0.00680215	0.611628	M1	Peripheral nodes	k__Bacteria	p__Firmicutes	c__Bacilli	o__Lactobacillales	f__Lactobacillaceae	g__Lactobacillus	s__
Otu31350	6	0	0.00582413	0.0684106	M2	Peripheral nodes	k__Bacteria	p__Firmicutes	c__Clostridia	o__Clostridiales	f__	g__	s__
Otu24	1	0	0.00242657	4.14e-07	M7	Peripheral nodes	k__Bacteria	p__Firmicutes	c__Bacilli	o__Lactobacillales	f__Lactobacillaceae	g__Lactobacillus	s__
Otu31624	50	51	0.00724593	0.6695	M2	Peripheral nodes	k__Bacteria	p__Firmicutes	c__Clostridia	o__Clostridiales	f__Clostridiaceae	g__	s__
Otu15859	6	2	0.00524515	0.0239387	M2	Peripheral nodes	k__Bacteria	p__Firmicutes	c__Clostridia	o__Clostridiales	f__Lachnospiraceae	g__Coprococcus	s__
Otu29998	52	70	0.00716789	0.743678	M2	Peripheral nodes	k__Bacteria	p__Firmicutes	c__Clostridia	o__Clostridiales	f__	g__	s__
Otu20810	65	33	0.00740336	0.918568	M1	Peripheral nodes	k__Bacteria	p__Actinobacteria	c__Actinobacteria	o__Actinomycetales	f__Streptomycetaceae	g__Streptomyces	s__
Otu16242	13	0	0.00526551	0.0323115	M2	Peripheral nodes	k__Bacteria	p__Firmicutes	c__Clostridia	o__Clostridiales	f__Clostridiaceae	g__	s__
Otu235	1	0	0.0796768	9.32e-18	M4	Peripheral nodes	k__Bacteria	p__Firmicutes	c__Bacilli	o__Lactobacillales	f__Aerococcaceae	g__Facklamia	s__
Otu5901	4	0	0.0919261	4.26e-17	M4	Peripheral nodes	k__Bacteria	p__Actinobacteria	c__Actinobacteria	o__Actinomycetales	f__Dietziaceae	g__	s__
Otu2552	2	0	0.00287643	1.87e-06	M3	Peripheral nodes	k__Bacteria	p__Proteobacteria	c__Gammaproteobacteria	o__Pasteurellales	f__Pasteurellaceae	g__	s__
Otu28454	58	187	0.00767247	0.802274	M1	Peripheral nodes	k__Bacteria	p__Proteobacteria	c__Alphaproteobacteria	o__Caulobacterales	f__Caulobacteraceae	g__Caulobacter	s__
Otu3817	58	1	0.00728921	0.829788	M1	Peripheral nodes	k__Bacteria	p__Proteobacteria	c__Gammaproteobacteria	o__Enterobacteriales	f__Enterobacteriaceae	g__	s__

## Sheet: cecum
Supplementary Table S1. The microbial co-abundance network modules of the cecum in F6 population
name	degree	betweenness_centrality	closeness_centrality	eigenvector_centrality	module	taxa_roles	Kingdom	Phylum	Class	Order	Family	Genus	Species
Otu172	2	0	0.00249614	0.00187555	M6	Peripheral nodes	k__Bacteria	p__Spirochaetes	c__Spirochaetes	o__Spirochaetales	f__Spirochaetaceae	g__Treponema	s__
Otu7365	2	0	0.00195555	0.000552465	M4	Peripheral nodes	k__Bacteria	p__Firmicutes	c__Clostridia	o__Clostridiales	f__Ruminococcaceae	g__	s__
Otu1017	8	131	0.00312063	0.0294185	M1	Peripheral nodes	k__Bacteria	p__Bacteroidetes	c__Bacteroidia	o__Bacteroidales	f__Porphyromonadaceae	g__Parabacteroides	s__
Otu17279	11	1121	0.0030256	0.0120204	M1	Peripheral nodes	k__Bacteria	p__Firmicutes	c__Clostridia	o__Clostridiales	f__Clostridiaceae	g__SMB53	s__
Otu9027	1	0	0.00237372	0.000262635	M3	Peripheral nodes	k__Bacteria	p__Cyanobacteria	c__4C0d-2	o__YS2	f__	g__	s__
Otu26283	2	0	0.00238718	0.000284083	M3	Peripheral nodes	k__Bacteria	p__Cyanobacteria	c__4C0d-2	o__YS2	f__	g__	s__
Otu8411	3	0	0.204759	7.92e-17	M7	Peripheral nodes	k__Bacteria	p__Bacteroidetes	c__Bacteroidia	o__Bacteroidales	f__Paraprevotellaceae	g__Prevotella	s__
Otu280	1	0	0.00251374	0.000978693	M6	Peripheral nodes	k__Bacteria	p__Spirochaetes	c__Spirochaetes	o__Spirochaetales	f__Spirochaetaceae	g__Treponema	s__
Otu719	10	499	0.00313786	0.51639	M2	Peripheral nodes	k__Bacteria	p__Bacteroidetes	c__Bacteroidia	o__Bacteroidales	f__Prevotellaceae	g__Prevotella	s__Prevotella_stercorea
Otu11596	2	0	0.00237698	0.0641001	M2	Peripheral nodes	k__Bacteria	p__Bacteroidetes	c__Bacteroidia	o__Bacteroidales	f__Prevotellaceae	g__Prevotella	s__
Otu581	4	0	0.249938	7.17e-17	M7	Peripheral nodes	k__Bacteria	p__Bacteroidetes	c__Bacteroidia	o__Bacteroidales	f__Paraprevotellaceae	g__Prevotella	s__
Otu633	1	0	0.00198266	0.000650058	M4	Peripheral nodes	k__Bacteria	p__Bacteroidetes	c__Bacteroidia	o__Bacteroidales	f__Paraprevotellaceae	g__	s__
Otu632	12	1	0.00302097	0.690748	M2	Peripheral nodes	k__Bacteria	p__Bacteroidetes	c__Bacteroidia	o__Bacteroidales	f__Prevotellaceae	g__Prevotella	s__Prevotella_copri
Otu631	1	0	1.9861	4.42e-18	M26	NA	k__Bacteria	p__Bacteroidetes	c__Bacteroidia	o__Bacteroidales	f__RF16	g__	s__
Otu636	6	394	0.00244817	0.0140147	M5	Peripheral nodes	k__Bacteria	p__Bacteroidetes	c__Bacteroidia	o__Bacteroidales	f__Bacteroidaceae	g__Bacteroides	s__
Otu635	2	0	0.00242131	0.0243742	M2	Peripheral nodes	k__Bacteria	p__Bacteroidetes	c__Bacteroidia	o__Bacteroidales	f__Prevotellaceae	g__Prevotella	s__
Otu639	11	639	0.00315967	0.0171417	M1	Peripheral nodes	k__Bacteria	p__Bacteroidetes	c__Bacteroidia	o__Bacteroidales	f__Porphyromonadaceae	g__Parabacteroides	s__
Otu7247	6	24	0.00331733	0.0306616	M1	Peripheral nodes	k__Bacteria	p__Firmicutes	c__Clostridia	o__Clostridiales	f__Ruminococcaceae	g__	s__
Otu31300	5	0	0.00297465	0.00905219	M1	Peripheral nodes	k__Bacteria	p__Firmicutes	c__Clostridia	o__Clostridiales	f__Clostridiaceae	g__SMB53	s__
Otu775	4	10	0.00225657	0.00467263	M5	Peripheral nodes	k__Bacteria	p__Bacteroidetes	c__Bacteroidia	o__Bacteroidales	f__Bacteroidaceae	g__Bacteroides	s__
Otu70	2	10	0.00275647	0.00320425	M1	Peripheral nodes	k__Bacteria	p__Firmicutes	c__Clostridia	o__Clostridiales	f__Peptococcaceae	g__rc4-4	s__
Otu7788	2	0	0.00250184	0.00204897	M1	Peripheral nodes	k__Bacteria	p__Bacteroidetes	c__Bacteroidia	o__Bacteroidales	f__Porphyromonadaceae	g__Parabacteroides	s__
Otu3440	1	0	1.85117	0	M20	NA	k__Bacteria	p__Tenericutes	c__Mollicutes	o__Anaeroplasmatales	f__Anaeroplasmataceae	g__Anaeroplasma	s__
Otu206	4	345	0.00280418	0.123112	M5	Peripheral nodes	k__Bacteria	p__Verrucomicrobia	c__Verruco-5	o__WCHB1-41	f__	g__	s__
Otu504	3	0	0.00247715	0.000357167	M3	Peripheral nodes	k__Bacteria	p__Firmicutes	c__Clostridia	o__	f__	g__	s__
Otu506	3	0	0.00184147	0.000570905	M5	Peripheral nodes	k__Bacteria	p__Spirochaetes	c__Spirochaetes	o__Sphaerochaetales	f__Sphaerochaetaceae	g__Sphaerochaeta	s__
Otu19860	4	0	0.00271146	0.00662298	M1	Peripheral nodes	k__Bacteria	p__Firmicutes	c__Clostridia	o__Clostridiales	f__	g__	s__
Otu7755	2	1	0.930146	7.98e-18	M11	Peripheral nodes	k__Bacteria	p__Firmicutes	c__Clostridia	o__Clostridiales	f__Ruminococcaceae	g__Oscillospira	s__
Otu1162	1	0	0.00209794	9.73e-05	M3	Peripheral nodes	k__Bacteria	p__Bacteroidetes	c__Bacteroidia	o__Bacteroidales	f__Paraprevotellaceae	g__CF231	s__
Otu127	7	2609	0.00289545	0.0883292	M4	Peripheral nodes	k__Bacteria	p__Proteobacteria	c__Deltaproteobacteria	o__Desulfovibrionales	f__Desulfovibrionaceae	g__Desulfovibrio	s__
Otu28854	1	0	0.00271692	0.00268858	M1	Peripheral nodes	k__Bacteria	p__Firmicutes	c__Clostridia	o__Clostridiales	f__Lachnospiraceae	g__	s__
Otu9216	1	0	0.00201882	2e-05	M3	Peripheral nodes	k__Bacteria	p__Cyanobacteria	c__4C0d-2	o__YS2	f__	g__	s__
Otu328	2	0	0.00236324	0.000799153	M6	Peripheral nodes	k__Bacteria	p__Spirochaetes	c__Spirochaetes	o__Spirochaetales	f__Spirochaetaceae	g__Treponema	s__
Otu10140	16	763	0.00330189	0.853951	M2	Peripheral nodes	k__Bacteria	p__Bacteroidetes	c__Bacteroidia	o__Bacteroidales	f__Prevotellaceae	g__Prevotella	s__Prevotella_copri
Otu7540	2	0	0.00198254	0.000413176	M9	Peripheral nodes	k__Bacteria	p__Firmicutes	c__Clostridia	o__Clostridiales	f__Ruminococcaceae	g__	s__
Otu8257	1	0	1.71292	0	M24	NA	k__Bacteria	p__Firmicutes	c__Clostridia	o__Clostridiales	f__Lachnospiraceae	g__	s__
Otu86	10	831	0.00324091	0.0126712	M6	Peripheral nodes	k__Bacteria	p__Spirochaetes	c__Spirochaetes	o__Spirochaetales	f__Spirochaetaceae	g__Treponema	s__
Otu85	3	0	0.00288219	0.00787288	M6	Peripheral nodes	k__Bacteria	p__Spirochaetes	c__Spirochaetes	o__Spirochaetales	f__Spirochaetaceae	g__Treponema	s__
Otu15616	1	0	1.95198	4.89e-18	M19	NA	k__Bacteria	p__Bacteroidetes	c__Bacteroidia	o__Bacteroidales	f__	g__	s__
Otu15613	4	7	0.00252904	0.152545	M2	Peripheral nodes	k__Bacteria	p__Bacteroidetes	c__Bacteroidia	o__Bacteroidales	f__Prevotellaceae	g__Prevotella	s__
Otu433	1	0	1.96271	6.46e-19	M18	NA	k__Bacteria	p__Proteobacteria	c__Gammaproteobacteria	o__Pasteurellales	f__Pasteurellaceae	g__Actinobacillus	s__
Otu8099	1	0	0.613346	6.43e-18	M11	Peripheral nodes	k__Bacteria	p__Firmicutes	c__Clostridia	o__Clostridiales	f__Ruminococcaceae	g__	s__
Otu608	1	0	0.00207303	7.27e-05	M6	Peripheral nodes	k__Bacteria	p__Bacteroidetes	c__Bacteroidia	o__Bacteroidales	f__	g__	s__
Otu601	1	0	1.9861	0	M26	NA	k__Bacteria	p__Bacteroidetes	c__Bacteroidia	o__Bacteroidales	f__	g__	s__
Otu9556	1	0	0.00239514	0.000251527	M3	Peripheral nodes	k__Bacteria	p__Cyanobacteria	c__4C0d-2	o__YS2	f__	g__	s__
Otu11000	3	0	0.0024836	0.000349938	M3	Peripheral nodes	k__Bacteria	p__Firmicutes	c__	o__	f__	g__	s__
Otu21503	1	0	0.00175716	2.52e-05	M9	Peripheral nodes	k__Bacteria	p__Firmicutes	c__Clostridia	o__Clostridiales	f__Ruminococcaceae	g__	s__
Otu674	3	0	0.00208024	0.000124056	M3	Peripheral nodes	k__Bacteria	p__Bacteroidetes	c__Bacteroidia	o__Bacteroidales	f__Prevotellaceae	g__Prevotella	s__
Otu8672	7	537	0.0034736	0.0701952	M1	Peripheral nodes	k__Bacteria	p__Firmicutes	c__Clostridia	o__Clostridiales	f__Mogibacteriaceae	g__	s__
Otu8671	7	779	0.0027239	0.0543729	M5	Peripheral nodes	k__Bacteria	p__Bacteroidetes	c__Bacteroidia	o__Bacteroidales	f__Bacteroidaceae	g__Bacteroides	s__
Otu682	12	1608	0.00259577	0.00122972	M3	Module hubs	k__Bacteria	p__Bacteroidetes	c__Bacteroidia	o__Bacteroidales	f__Prevotellaceae	g__Prevotella	s__
Otu687	1	0	0.00245532	0.000518057	M1	Peripheral nodes	k__Bacteria	p__Bacteroidetes	c__Bacteroidia	o__Bacteroidales	f__Prevotellaceae	g__Prevotella	s__
Otu684	15	335	0.00306118	0.636652	M2	Peripheral nodes	k__Bacteria	p__Bacteroidetes	c__Bacteroidia	o__Bacteroidales	f__Prevotellaceae	g__Prevotella	s__
Otu16384	2	0	0.00222464	0.000287853	M15	NA	k__Bacteria	p__Bacteroidetes	c__Bacteroidia	o__Bacteroidales	f__	g__	s__
Otu11086	10	33	0.00308618	0.60618	M2	Peripheral nodes	k__Bacteria	p__Bacteroidetes	c__Bacteroidia	o__Bacteroidales	f__Prevotellaceae	g__Prevotella	s__Prevotella_copri
Otu8733	4	479	0.00200756	0.000641237	M4	Peripheral nodes	k__Bacteria	p__Firmicutes	c__Clostridia	o__Clostridiales	f__Lachnospiraceae	g__Roseburia	s__
Otu16266	5	637	0.00243591	0.000273065	M3	Peripheral nodes	k__Bacteria	p__Cyanobacteria	c__4C0d-2	o__YS2	f__	g__	s__
Otu1136	2	0	0.00292228	0.122231	M2	Peripheral nodes	k__Bacteria	p__Bacteroidetes	c__Bacteroidia	o__Bacteroidales	f__S24-7	g__	s__
Otu1135	1	0	1.97239	1.01e-18	M17	NA	k__Bacteria	p__Bacteroidetes	c__Bacteroidia	o__Bacteroidales	f__S24-7	g__	s__
Otu870	14	486	0.00293724	0.607985	M2	Peripheral nodes	k__Bacteria	p__Bacteroidetes	c__Bacteroidia	o__Bacteroidales	f__Prevotellaceae	g__Prevotella	s__
Otu117	3	99	0.00304129	0.0157146	M1	Peripheral nodes	k__Bacteria	p__Spirochaetes	c__Spirochaetes	o__Spirochaetales	f__Spirochaetaceae	g__Treponema	s__
Otu111	2	161	0.00201476	0.000604852	M4	Peripheral nodes	k__Bacteria	p__Verrucomicrobia	c__Verruco-5	o__WCHB1-41	f__RFP12	g__	s__
Otu10631	1	0	0.00249024	0.0774743	M2	Peripheral nodes	k__Bacteria	p__Bacteroidetes	c__Bacteroidia	o__Bacteroidales	f__Prevotellaceae	g__Prevotella	s__Prevotella_copri
Otu697	1	0	1.74429	5.07e-18	M22	NA	k__Bacteria	p__Bacteroidetes	c__Bacteroidia	o__Bacteroidales	f__Paraprevotellaceae	g__Prevotella	s__
Otu18366	4	0	0.00255	0.00136572	M8	Peripheral nodes	k__Bacteria	p__Bacteroidetes	c__Bacteroidia	o__Bacteroidales	f__	g__	s__
Otu657	2	335	0.00266453	0.00661182	M4	Peripheral nodes	k__Bacteria	p__Bacteroidetes	c__Bacteroidia	o__Bacteroidales	f__Porphyromonadaceae	g__Parabacteroides	s__
Otu653	2	161	0.00256853	0.000902635	M6	Peripheral nodes	k__Bacteria	p__Bacteroidetes	c__Bacteroidia	o__Bacteroidales	f__	g__	s__
Otu11504	2	0	0.0020939	0.000109027	M3	Peripheral nodes	k__Bacteria	p__Bacteroidetes	c__Bacteroidia	o__Bacteroidales	f__Prevotellaceae	g__Prevotella	s__
Otu21086	1	0	0.00194708	0.000517071	M4	Peripheral nodes	k__Bacteria	p__Firmicutes	c__Clostridia	o__Clostridiales	f__	g__	s__
Otu7743	1	0	0.626999	7.72e-18	M11	Peripheral nodes	k__Bacteria	p__Firmicutes	c__Clostridia	o__Clostridiales	f__Ruminococcaceae	g__Oscillospira	s__
Otu1107	7	947	0.00298398	0.00459749	M8	Peripheral nodes	k__Bacteria	p__Bacteroidetes	c__Bacteroidia	o__Bacteroidales	f__	g__	s__
Otu525	10	6	0.00305442	0.565163	M2	Peripheral nodes	k__Bacteria	p__Firmicutes	c__Clostridia	o__Clostridiales	f__Veillonellaceae	g__Anaerovibrio	s__
Otu16019	1	0	0.00171253	4.76e-05	M4	Peripheral nodes	k__Bacteria	p__Firmicutes	c__Clostridia	o__Clostridiales	f__Lachnospiraceae	g__	s__
Otu9176	3	0	0.00234396	0.000331682	M3	Peripheral nodes	k__Bacteria	p__Cyanobacteria	c__4C0d-2	o__YS2	f__	g__	s__
Otu15670	2	0	0.00320135	0.0800258	M1	Peripheral nodes	k__Bacteria	p__Bacteroidetes	c__Bacteroidia	o__Bacteroidales	f__Paraprevotellaceae	g__Prevotella	s__
Otu146	2	0	0.00181042	7.21e-06	M3	Peripheral nodes	k__Bacteria	p__Verrucomicrobia	c__Verruco-5	o__WCHB1-41	f__RFP12	g__	s__
Otu9486	2	0	0.00206514	0.000116763	M3	Peripheral nodes	k__Bacteria	p__Bacteroidetes	c__Bacteroidia	o__Bacteroidales	f__Prevotellaceae	g__Prevotella	s__
Otu11643	2	0	0.00203331	0.000207122	M10	Peripheral nodes	k__Bacteria	p__Firmicutes	c__Clostridia	o__Clostridiales	f__Clostridiaceae	g__Clostridium	s__Clostridium_butyricum
Otu18913	5	0	0.00234705	0.00183027	M8	Peripheral nodes	k__Bacteria	p__Bacteroidetes	c__Bacteroidia	o__Bacteroidales	f__	g__	s__
Otu661	4	8	0.00273261	0.00488986	M1	Peripheral nodes	k__Bacteria	p__Bacteroidetes	c__Bacteroidia	o__Bacteroidales	f__Porphyromonadaceae	g__Parabacteroides	s__
Otu599	5	1183	0.0024209	0.00822787	M4	Peripheral nodes	k__Bacteria	p__Bacteroidetes	c__Bacteroidia	o__Bacteroidales	f__	g__	s__
Otu628	14	3209	0.00371887	0.0832356	M1	Peripheral nodes	k__Bacteria	p__Bacteroidetes	c__Bacteroidia	o__Bacteroidales	f__	g__	s__
Otu3234	1	0	1.85117	3.34e-18	M20	NA	k__Bacteria	p__Tenericutes	c__Mollicutes	o__Anaeroplasmatales	f__Anaeroplasmataceae	g__Anaeroplasma	s__
Otu31314	2	0	0.00245441	0.00193572	M1	Peripheral nodes	k__Bacteria	p__Firmicutes	c__Clostridia	o__Clostridiales	f__	g__	s__
Otu67	2	1	0.736214	1.51e-18	M12	Peripheral nodes	k__Bacteria	p__Firmicutes	c__Bacilli	o__Lactobacillales	f__Lactobacillaceae	g__Lactobacillus	s__Lactobacillus_reuteri
Otu15816	2	0	0.00288827	0.0507357	M9	Peripheral nodes	k__Bacteria	p__Firmicutes	c__Clostridia	o__Clostridiales	f__Lachnospiraceae	g__Blautia	s__
Otu10495	2	0	0.00208798	0.000110344	M3	Peripheral nodes	k__Bacteria	p__Bacteroidetes	c__Bacteroidia	o__Bacteroidales	f__Prevotellaceae	g__Prevotella	s__
Otu482	3	0	0.00187252	0.000532377	M5	Peripheral nodes	k__Bacteria	p__Spirochaetes	c__Spirochaetes	o__Sphaerochaetales	f__Sphaerochaetaceae	g__Sphaerochaeta	s__
Otu483	3	1070	0.00298467	0.054664	M5	Peripheral nodes	k__Bacteria	p__Spirochaetes	c__Spirochaetes	o__Sphaerochaetales	f__Sphaerochaetaceae	g__Sphaerochaeta	s__
Otu488	1	0	0.665026	1.15e-17	M16	Peripheral nodes	k__Bacteria	p__Firmicutes	c__Clostridia	o__Clostridiales	f__Veillonellaceae	g__Anaerovibrio	s__
Otu8997	2	0	0.00282454	0.00362684	M1	Peripheral nodes	k__Bacteria	p__Firmicutes	c__Clostridia	o__Clostridiales	f__Ruminococcaceae	g__	s__
Otu1159	3	0	0.0029557	0.14607	M2	Peripheral nodes	k__Bacteria	p__Bacteroidetes	c__Bacteroidia	o__Bacteroidales	f__Paraprevotellaceae	g__Prevotella	s__
Otu1150	1	0	0.00214265	0.00817502	M2	Peripheral nodes	k__Bacteria	p__Bacteroidetes	c__Bacteroidia	o__Bacteroidales	f__Paraprevotellaceae	g__YRC22	s__
Otu1151	9	558	0.00303524	0.281732	M2	Peripheral nodes	k__Bacteria	p__Bacteroidetes	c__Bacteroidia	o__Bacteroidales	f__Paraprevotellaceae	g__CF231	s__
Otu9142	13	25	0.00320732	0.756846	M2	Peripheral nodes	k__Bacteria	p__Bacteroidetes	c__Bacteroidia	o__Bacteroidales	f__Prevotellaceae	g__Prevotella	s__Prevotella_copri
Otu19658	5	59	0.00308195	0.0120508	M1	Peripheral nodes	k__Bacteria	p__Firmicutes	c__Clostridia	o__Clostridiales	f__Peptostreptococcaceae	g__	s__
Otu15688	20	3900	0.00364263	0.0448206	M1	Module hubs	k__Bacteria	p__Firmicutes	c__Clostridia	o__Clostridiales	f__Lachnospiraceae	g__Dorea	s__
Otu135	6	109	0.0028381	0.00675892	M1	Peripheral nodes	k__Bacteria	p__Firmicutes	c__Clostridia	o__Clostridiales	f__Peptococcaceae	g__Peptococcus	s__
Otu139	1	0	0.00292347	0.0120397	M1	Peripheral nodes	k__Bacteria	p__Firmicutes	c__Clostridia	o__Clostridiales	f__Veillonellaceae	g__Phascolarctobacterium	s__
Otu735	22	2015	0.00361906	0.895405	M2	Peripheral nodes	k__Bacteria	p__Bacteroidetes	c__Bacteroidia	o__Bacteroidales	f__Prevotellaceae	g__Prevotella	s__
Otu6986	3	161	0.00195251	0.000562547	M4	Peripheral nodes	k__Bacteria	p__Firmicutes	c__Clostridia	o__Clostridiales	f__Ruminococcaceae	g__	s__
Otu6987	2	0	0.938615	3.92e-18	M14	NA	k__Bacteria	p__Fusobacteria	c__Fusobacteriia	o__Fusobacteriales	f__Fusobacteriaceae	g__	s__
Otu30330	4	12	0.00249243	0.0022469	M10	Peripheral nodes	k__Bacteria	p__Firmicutes	c__Clostridia	o__Clostridiales	f__Clostridiaceae	g__Clostridium	s__Clostridium_celatum
Otu783	3	0	0.00211705	0.00011469	M3	Peripheral nodes	k__Bacteria	p__Bacteroidetes	c__Bacteroidia	o__Bacteroidales	f__Prevotellaceae	g__Prevotella	s__
Otu28665	2	0	0.00170545	5.34e-05	M4	Peripheral nodes	k__Bacteria	p__Firmicutes	c__Clostridia	o__Clostridiales	f__Lachnospiraceae	g__Roseburia	s__
Otu37	8	328	0.00296892	0.00983661	M6	Peripheral nodes	k__Bacteria	p__Spirochaetes	c__Spirochaetes	o__Spirochaetales	f__Spirochaetaceae	g__Treponema	s__
Otu15867	3	0	0.00327847	0.126054	M2	Peripheral nodes	k__Bacteria	p__Firmicutes	c__Clostridia	o__Clostridiales	f__Lachnospiraceae	g__	s__
Otu7987	1	0	0.154885	1.4e-17	M7	Peripheral nodes	k__Bacteria	p__Bacteroidetes	c__Bacteroidia	o__Bacteroidales	f__Paraprevotellaceae	g__Prevotella	s__
Otu19661	5	360	0.00307379	0.00730558	M1	Peripheral nodes	k__Bacteria	p__Firmicutes	c__Clostridia	o__Clostridiales	f__	g__	s__
Otu19662	1	0	0.00233008	0.00640516	M4	Peripheral nodes	k__Bacteria	p__Firmicutes	c__Clostridia	o__Clostridiales	f__Mogibacteriaceae	g__	s__
Otu15942	2	0	0.00229925	0.000250642	M15	NA	k__Bacteria	p__Bacteroidetes	c__Bacteroidia	o__Bacteroidales	f__Paraprevotellaceae	g__	s__
Otu9639	6	0	0.00267241	0.335659	M2	Peripheral nodes	k__Bacteria	p__Bacteroidetes	c__Bacteroidia	o__Bacteroidales	f__Prevotellaceae	g__Prevotella	s__Prevotella_copri
Otu9090	3	0	0.00264281	0.00272576	M1	Peripheral nodes	k__Bacteria	p__Bacteroidetes	c__Bacteroidia	o__Bacteroidales	f__Porphyromonadaceae	g__Parabacteroides	s__
Otu8941	10	2467	0.00301026	0.00340711	M3	Module hubs	k__Bacteria	p__Cyanobacteria	c__4C0d-2	o__YS2	f__	g__	s__
Otu1393	6	726	0.00270661	0.0076128	M8	Peripheral nodes	k__Bacteria	p__Bacteroidetes	c__Bacteroidia	o__Bacteroidales	f__	g__	s__
Otu7009	2	161	0.0019325	0.000549626	M4	Peripheral nodes	k__Bacteria	p__Firmicutes	c__Clostridia	o__Clostridiales	f__	g__	s__
Otu21627	1	0	1.77651	6.53e-18	M21	NA	k__Bacteria	p__Firmicutes	c__Clostridia	o__Clostridiales	f__Ruminococcaceae	g__	s__
Otu13160	1	0	0.00180211	0.000388423	M5	Peripheral nodes	k__Bacteria	p__Bacteroidetes	c__Bacteroidia	o__Bacteroidales	f__Bacteroidaceae	g__Bacteroides	s__
Otu21563	1	0	0.00167452	4.14e-05	M4	Peripheral nodes	k__Bacteria	p__Firmicutes	c__Clostridia	o__Clostridiales	f__Ruminococcaceae	g__	s__
Otu645	6	362	0.00259076	0.117031	M2	Peripheral nodes	k__Bacteria	p__Bacteroidetes	c__Bacteroidia	o__Bacteroidales	f__Prevotellaceae	g__Prevotella	s__
Otu643	14	2016	0.00324494	0.60639	M2	Peripheral nodes	k__Bacteria	p__Bacteroidetes	c__Bacteroidia	o__Bacteroidales	f__Prevotellaceae	g__Prevotella	s__
Otu640	21	423	0.00320477	1	M2	Peripheral nodes	k__Bacteria	p__Bacteroidetes	c__Bacteroidia	o__Bacteroidales	f__Prevotellaceae	g__Prevotella	s__Prevotella_copri
Otu649	2	0	0.00241965	0.0501134	M2	Peripheral nodes	k__Bacteria	p__Bacteroidetes	c__Bacteroidia	o__Bacteroidales	f__Prevotellaceae	g__Prevotella	s__
Otu8157	1	0	0.00239625	0.000250958	M3	Peripheral nodes	k__Bacteria	p__Cyanobacteria	c__4C0d-2	o__YS2	f__	g__	s__
Otu17787	1	0	0.00230483	0.0254537	M2	Peripheral nodes	k__Bacteria	p__Bacteroidetes	c__Bacteroidia	o__Bacteroidales	f__Paraprevotellaceae	g__CF231	s__
Otu472	1	0	0.00274526	0.00256788	M1	Peripheral nodes	k__Bacteria	p__Firmicutes	c__Erysipelotrichi	o__Erysipelotrichales	f__Erysipelotrichaceae	g__p-75-a5	s__
Otu476	16	2000	0.00352826	0.0367096	M1	Peripheral nodes	k__Bacteria	p__Firmicutes	c__Erysipelotrichi	o__Erysipelotrichales	f__Erysipelotrichaceae	g__p-75-a5	s__
Otu478	4	477	0.00230145	0.00502386	M5	Peripheral nodes	k__Bacteria	p__Spirochaetes	c__Spirochaetes	o__Sphaerochaetales	f__Sphaerochaetaceae	g__Sphaerochaeta	s__
Otu15702	7	0	0.00305303	0.396197	M2	Peripheral nodes	k__Bacteria	p__Firmicutes	c__Clostridia	o__Clostridiales	f__Ruminococcaceae	g__	s__
Otu15707	6	174	0.00245781	0.00242752	M10	Peripheral nodes	k__Bacteria	p__Firmicutes	c__Clostridia	o__Clostridiales	f__Clostridiaceae	g__	s__
Otu769	11	3	0.0030147	0.628272	M2	Peripheral nodes	k__Bacteria	p__Bacteroidetes	c__Bacteroidia	o__Bacteroidales	f__Prevotellaceae	g__Prevotella	s__Prevotella_copri
Otu43	4	17	0.0026509	0.0029632	M6	Peripheral nodes	k__Bacteria	p__Spirochaetes	c__Spirochaetes	o__Spirochaetales	f__Spirochaetaceae	g__Treponema	s__
Otu42	1	0	0.455436	9.9e-18	M12	Peripheral nodes	k__Bacteria	p__Firmicutes	c__Bacilli	o__Lactobacillales	f__Lactobacillaceae	g__Lactobacillus	s__
Otu7794	1	0	0.627313	2.76e-18	M13	Peripheral nodes	k__Bacteria	p__Bacteroidetes	c__Bacteroidia	o__Bacteroidales	f__Paraprevotellaceae	g__Prevotella	s__
Otu217	11	224	0.00329155	0.0428817	M1	Peripheral nodes	k__Bacteria	p__Proteobacteria	c__Betaproteobacteria	o__Burkholderiales	f__Alcaligenaceae	g__Sutterella	s__
Otu13294	1	0	1.95198	5.27e-18	M19	NA	k__Bacteria	p__Bacteroidetes	c__Bacteroidia	o__Bacteroidales	f__	g__	s__
Otu15788	5	636	0.00307008	0.0609287	M9	Connectors	k__Bacteria	p__Firmicutes	c__Clostridia	o__Clostridiales	f__Lachnospiraceae	g__	s__
Otu24200	1	0	0.663922	9.1e-18	M16	Peripheral nodes	k__Bacteria	p__Proteobacteria	c__Gammaproteobacteria	o__Aeromonadales	f__Succinivibrionaceae	g__Succinivibrio	s__
Otu1175	1	0	0.00288236	0.0127688	M1	Peripheral nodes	k__Bacteria	p__Bacteroidetes	c__Bacteroidia	o__Bacteroidales	f__	g__	s__
Otu15668	1	0	1.71292	9.56e-18	M24	NA	k__Bacteria	p__Firmicutes	c__Clostridia	o__Clostridiales	f__Lachnospiraceae	g__	s__
Otu153	1	0	0.00167646	5.24e-05	M4	Peripheral nodes	k__Bacteria	p__Verrucomicrobia	c__Verruco-5	o__WCHB1-41	f__RFP12	g__	s__
Otu156	3	320	0.00215004	8.82e-05	M3	Peripheral nodes	k__Bacteria	p__Verrucomicrobia	c__Verruco-5	o__WCHB1-41	f__RFP12	g__	s__
Otu28833	4	144	0.00240126	0.00155304	M10	Peripheral nodes	k__Bacteria	p__Firmicutes	c__Clostridia	o__Clostridiales	f__Clostridiaceae	g__Clostridium	s__Clostridium_celatum
Otu1240	3	320	0.00282436	0.00320488	M15	NA	k__Bacteria	p__Bacteroidetes	c__Bacteroidia	o__Bacteroidales	f__Paraprevotellaceae	g__CF231	s__
Otu15767	4	0	0.0030433	0.229244	M2	Peripheral nodes	k__Bacteria	p__Firmicutes	c__Clostridia	o__Clostridiales	f__Ruminococcaceae	g__Faecalibacterium	s__Faecalibacterium_prausnitzii
Otu99	1	0	1.96271	3.58e-18	M18	NA	k__Bacteria	p__Proteobacteria	c__Gammaproteobacteria	o__Enterobacteriales	f__Enterobacteriaceae	g__Escherichia	s__Escherichia_coli
Otu90	3	1	0.00205639	0.000324558	M10	Peripheral nodes	k__Bacteria	p__Firmicutes	c__Bacilli	o__Turicibacterales	f__Turicibacteraceae	g__Turicibacter	s__
Otu9950	3	161	0.00211883	0.00541158	M5	Peripheral nodes	k__Bacteria	p__Bacteroidetes	c__Bacteroidia	o__Bacteroidales	f__Bacteroidaceae	g__Bacteroides	s__
Otu612	4	0	0.00264775	0.00114682	M8	Peripheral nodes	k__Bacteria	p__Bacteroidetes	c__Bacteroidia	o__Bacteroidales	f__Prevotellaceae	g__Prevotella	s__
Otu614	1	0	0.00203696	0.0106272	M2	Peripheral nodes	k__Bacteria	p__Bacteroidetes	c__Bacteroidia	o__Bacteroidales	f__Prevotellaceae	g__Prevotella	s__
Otu617	21	3629	0.00371221	0.659443	M2	Peripheral nodes	k__Bacteria	p__Bacteroidetes	c__Bacteroidia	o__Bacteroidales	f__Prevotellaceae	g__Prevotella	s__Prevotella_stercorea
Otu616	11	5	0.00311592	0.559249	M2	Peripheral nodes	k__Bacteria	p__Bacteroidetes	c__Bacteroidia	o__Bacteroidales	f__	g__	s__
Otu7765	2	1	0.996711	6.51e-18	M16	Peripheral nodes	k__Bacteria	p__Proteobacteria	c__Gammaproteobacteria	o__Aeromonadales	f__Succinivibrionaceae	g__Succinivibrio	s__
Otu26080	1	0	0.00172024	1.51e-06	M3	Peripheral nodes	k__Bacteria	p__Cyanobacteria	c__4C0d-2	o__YS2	f__	g__	s__
Otu1528	4	0	0.00331719	0.0250339	M1	Peripheral nodes	k__Bacteria	p__Bacteroidetes	c__Bacteroidia	o__Bacteroidales	f__S24-7	g__	s__
Otu1526	3	6	0.00315229	0.0592731	M1	Peripheral nodes	k__Bacteria	p__Bacteroidetes	c__Bacteroidia	o__Bacteroidales	f__S24-7	g__	s__
Otu976	2	9	0.00238516	0.0521209	M2	Peripheral nodes	k__Bacteria	p__Bacteroidetes	c__Bacteroidia	o__Bacteroidales	f__Prevotellaceae	g__Prevotella	s__
Otu702	5	352	0.00279026	0.00382646	M1	Peripheral nodes	k__Bacteria	p__Bacteroidetes	c__Bacteroidia	o__Bacteroidales	f__Porphyromonadaceae	g__Parabacteroides	s__
Otu30001	2	161	0.00203675	1.94e-05	M3	Peripheral nodes	k__Bacteria	p__Cyanobacteria	c__4C0d-2	o__YS2	f__	g__	s__
Otu11536	1	0	1.71762	0	M23	NA	k__Bacteria	p__Firmicutes	c__Clostridia	o__Clostridiales	f__Lachnospiraceae	g__Roseburia	s__
Otu565	2	0	0.956663	6.51e-18	M14	NA	k__Bacteria	p__Bacteroidetes	c__Bacteroidia	o__Bacteroidales	f__Bacteroidaceae	g__Bacteroides	s__Bacteroides_coprophilus
Otu560	1	0	0.627353	2.62e-18	M13	Peripheral nodes	k__Bacteria	p__Bacteroidetes	c__Bacteroidia	o__Bacteroidales	f__Paraprevotellaceae	g__Prevotella	s__
Otu569	3	4	0.23855	6.41e-17	M7	Peripheral nodes	k__Bacteria	p__Bacteroidetes	c__Bacteroidia	o__Bacteroidales	f__Paraprevotellaceae	g__Prevotella	s__
Otu568	11	62	0.00299656	0.645739	M2	Peripheral nodes	k__Bacteria	p__Bacteroidetes	c__Bacteroidia	o__Bacteroidales	f__Prevotellaceae	g__Prevotella	s__
Otu15771	3	0	0.00273462	0.00556941	M1	Peripheral nodes	k__Bacteria	p__Firmicutes	c__Clostridia	o__Clostridiales	f__Lachnospiraceae	g__Ruminococcus	s__Ruminococcus_gnavus
Otu18123	5	1	0.00251507	0.00150013	M8	Peripheral nodes	k__Bacteria	p__Bacteroidetes	c__Bacteroidia	o__Bacteroidales	f__	g__	s__
Otu8723	1	0	1.45033	4.13e-18	M25	NA	k__Bacteria	p__Proteobacteria	c__Epsilonproteobacteria	o__Campylobacterales	f__Campylobacteraceae	g__Campylobacter	s__
Otu714	4	2	0.00202599	0.000144687	M3	Peripheral nodes	k__Bacteria	p__Bacteroidetes	c__Bacteroidia	o__Bacteroidales	f__Prevotellaceae	g__Prevotella	s__
Otu717	6	15	0.00309049	0.0270471	M1	Peripheral nodes	k__Bacteria	p__Bacteroidetes	c__Bacteroidia	o__Bacteroidales	f__Porphyromonadaceae	g__Parabacteroides	s__
Otu27470	1	0	1.71762	9.68e-18	M23	NA	k__Bacteria	p__Firmicutes	c__Clostridia	o__Clostridiales	f__Lachnospiraceae	g__Roseburia	s__
Otu1148	3	1	0.00285562	0.010811	M1	Peripheral nodes	k__Bacteria	p__Bacteroidetes	c__Bacteroidia	o__Bacteroidales	f__S24-7	g__	s__
Otu1147	1	0	0.00271016	0.00492588	M1	Peripheral nodes	k__Bacteria	p__Firmicutes	c__Erysipelotrichi	o__Erysipelotrichales	f__Erysipelotrichaceae	g__Bulleidia	s__Bulleidia_p-1630-c5
Otu1145	1	0	0.0023896	0.0217014	M2	Peripheral nodes	k__Bacteria	p__Bacteroidetes	c__Bacteroidia	o__Bacteroidales	f__S24-7	g__	s__
Otu264	2	0	0.00181322	7.15e-06	M3	Peripheral nodes	k__Bacteria	p__Verrucomicrobia	c__Verruco-5	o__WCHB1-41	f__RFP12	g__	s__
Otu30712	6	167	0.00301653	0.0153583	M1	Peripheral nodes	k__Bacteria	p__Firmicutes	c__Clostridia	o__Clostridiales	f__Lachnospiraceae	g__Dorea	s__
Otu10244	1	0	1.74429	0	M22	NA	k__Bacteria	p__Bacteroidetes	c__Bacteroidia	o__Bacteroidales	f__Paraprevotellaceae	g__Prevotella	s__
Otu26337	1	0	1.45033	2.03e-18	M25	NA	k__Bacteria	p__Proteobacteria	c__Epsilonproteobacteria	o__Campylobacterales	f__Campylobacteraceae	g__Campylobacter	s__
Otu5877	3	0	0.00191877	0.00047765	M5	Peripheral nodes	k__Bacteria	p__Spirochaetes	c__Spirochaetes	o__Sphaerochaetales	f__Sphaerochaetaceae	g__Sphaerochaeta	s__
Otu6995	5	947	0.0023538	0.00673343	M4	Peripheral nodes	k__Bacteria	p__Firmicutes	c__Clostridia	o__Clostridiales	f__Ruminococcaceae	g__	s__
Otu6997	1	0	1.77651	0	M21	NA	k__Bacteria	p__Firmicutes	c__Clostridia	o__Clostridiales	f__Ruminococcaceae	g__	s__
Otu6993	3	161	0.00205459	0.000353521	M9	Peripheral nodes	k__Bacteria	p__Firmicutes	c__Clostridia	o__Clostridiales	f__Ruminococcaceae	g__	s__
Otu186	17	2335	0.00382392	0.172735	M1	Peripheral nodes	k__Bacteria	p__Proteobacteria	c__Betaproteobacteria	o__Burkholderiales	f__Alcaligenaceae	g__Sutterella	s__
Otu7884	3	0	0.206045	5.92e-17	M7	Peripheral nodes	k__Bacteria	p__Bacteroidetes	c__Bacteroidia	o__Bacteroidales	f__Paraprevotellaceae	g__Prevotella	s__
Otu1061	1	0	0.00234744	0.0450026	M2	Peripheral nodes	k__Bacteria	p__Bacteroidetes	c__Bacteroidia	o__Bacteroidales	f__Prevotellaceae	g__Prevotella	s__
Otu19724	1	0	1.97239	3.51e-18	M17	NA	k__Bacteria	p__Firmicutes	c__Clostridia	o__Clostridiales	f__Lachnospiraceae	g__	s__
Otu27503	2	0	0.00168848	5.65e-05	M4	Peripheral nodes	k__Bacteria	p__Firmicutes	c__Clostridia	o__Clostridiales	f__Lachnospiraceae	g__Roseburia	s__
Otu24	1	0	0.532141	8.45e-18	M12	Peripheral nodes	k__Bacteria	p__Firmicutes	c__Bacilli	o__Lactobacillales	f__Lactobacillaceae	g__Lactobacillus	s__
Otu29998	11	637	0.00301567	0.0134987	M1	Peripheral nodes	k__Bacteria	p__Firmicutes	c__Clostridia	o__Clostridiales	f__	g__	s__
Otu7115	1	0	0.0016514	4.19e-05	M4	Peripheral nodes	k__Bacteria	p__Firmicutes	c__Clostridia	o__Clostridiales	f__	g__	s__
Otu754	9	99	0.00294461	0.0136647	M1	Peripheral nodes	k__Bacteria	p__Bacteroidetes	c__Bacteroidia	o__Bacteroidales	f__Porphyromonadaceae	g__Parabacteroides	s__
Otu755	3	0	0.0020089	0.00187107	M5	Peripheral nodes	k__Bacteria	p__Bacteroidetes	c__Bacteroidia	o__Bacteroidales	f__Bacteroidaceae	g__Bacteroides	s__
Otu15729	1	0	0.00280068	0.00320082	M1	Peripheral nodes	k__Bacteria	p__Firmicutes	c__Clostridia	o__Clostridiales	f__Lachnospiraceae	g__Coprococcus	s__
Otu6942	3	477	0.00246221	0.00446442	M9	Peripheral nodes	k__Bacteria	p__Firmicutes	c__Clostridia	o__Clostridiales	f__Ruminococcaceae	g__	s__
Otu9802	18	440	0.00327263	0.8783	M2	Peripheral nodes	k__Bacteria	p__Bacteroidetes	c__Bacteroidia	o__Bacteroidales	f__Prevotellaceae	g__Prevotella	s__
Otu11066	1	0	0.0020299	1.94e-05	M3	Peripheral nodes	k__Bacteria	p__Cyanobacteria	c__4C0d-2	o__YS2	f__	g__	s__
Otu1118	2	1	0.940999	1.51e-17	M13	Peripheral nodes	k__Bacteria	p__Bacteroidetes	c__Bacteroidia	o__Bacteroidales	f__Paraprevotellaceae	g__Prevotella	s__
Otu232	2	0	0.00234513	0.000825104	M6	Peripheral nodes	k__Bacteria	p__Spirochaetes	c__Spirochaetes	o__Spirochaetales	f__Spirochaetaceae	g__Treponema	s__
Otu10901	2	0	0.00222268	0.00439522	M5	Peripheral nodes	k__Bacteria	p__Bacteroidetes	c__Bacteroidia	o__Bacteroidales	f__Bacteroidaceae	g__Bacteroides	s__
Otu691	1	0	0.00252363	0.0728768	M2	Peripheral nodes	k__Bacteria	p__Bacteroidetes	c__Bacteroidia	o__Bacteroidales	f__Prevotellaceae	g__Prevotella	s__
Otu8524	4	4	0.267158	8.24e-17	M7	Peripheral nodes	k__Bacteria	p__Bacteroidetes	c__Bacteroidia	o__Bacteroidales	f__Paraprevotellaceae	g__Prevotella	s__
Otu7014	2	0	0.963113	1.1e-17	M14	NA	k__Bacteria	p__Fusobacteria	c__Fusobacteriia	o__Fusobacteriales	f__Fusobacteriaceae	g__Fusobacterium	s__
Otu2145	2	0	0.00253384	0.00120581	M6	Peripheral nodes	k__Bacteria	p__Spirochaetes	c__Spirochaetes	o__Spirochaetales	f__Spirochaetaceae	g__Treponema	s__
Otu810	4	0	0.00222819	0.00492022	M5	Peripheral nodes	k__Bacteria	p__Bacteroidetes	c__Bacteroidia	o__Bacteroidales	f__Bacteroidaceae	g__Bacteroides	s__
Otu818	4	216	0.00257391	0.0415481	M5	Peripheral nodes	k__Bacteria	p__Bacteroidetes	c__Bacteroidia	o__Bacteroidales	f__Bacteroidaceae	g__Bacteroides	s__

## Sheet: feces
Supplementary Table S1. The microbial co-abundance network modules of the feces in F6 population
name	degree	betweenness_centrality	closeness_centrality	eigenvector_centrality	module	taxa_roles	Kingdom	Phylum	Class	Order	Family	Genus	Species
Otu20719	29	1	0.00139151	0.613859	M2	Peripheral nodes	k__Bacteria	p__Actinobacteria	c__Actinobacteria	o__Actinomycetales	f__Nocardiaceae	g__Nocardia	s__
Otu7365	3	0	0.00204055	7.18e-08	M1	Peripheral nodes	k__Bacteria	p__Firmicutes	c__Clostridia	o__Clostridiales	f__Ruminococcaceae	g__	s__
Otu17279	3	2	0.576834	4.36e-17	M7	Peripheral nodes	k__Bacteria	p__Firmicutes	c__Clostridia	o__Clostridiales	f__Clostridiaceae	g__SMB53	s__
Otu9027	2	0	0.936505	1.74e-17	M15	NA	k__Bacteria	p__Cyanobacteria	c__4C0d-2	o__YS2	f__	g__	s__
Otu17332	10	0	0.00139326	0.219075	M2	Peripheral nodes	k__Bacteria	p__Proteobacteria	c__Alphaproteobacteria	o__Rhodobacterales	f__Rhodobacteraceae	g__Rhodobacter	s__
Otu10308	4	1199	0.00187229	7.61e-10	M3	Peripheral nodes	k__Bacteria	p__Bacteroidetes	c__Bacteroidia	o__Bacteroidales	f__Prevotellaceae	g__Prevotella	s__
Otu280	2	0	0.748559	8.71e-18	M16	NA	k__Bacteria	p__Spirochaetes	c__Spirochaetes	o__Spirochaetales	f__Spirochaetaceae	g__Treponema	s__
Otu9738	6	341	0.00172566	1.13e-09	M3	Peripheral nodes	k__Bacteria	p__Bacteroidetes	c__Bacteroidia	o__Bacteroidales	f__Prevotellaceae	g__Prevotella	s__
Otu11596	2	0	0.00179151	2.58e-08	M4	Peripheral nodes	k__Bacteria	p__Bacteroidetes	c__Bacteroidia	o__Bacteroidales	f__Prevotellaceae	g__Prevotella	s__
Otu632	18	3341	0.00248785	1.34e-05	M4	Module hubs	k__Bacteria	p__Bacteroidetes	c__Bacteroidia	o__Bacteroidales	f__Prevotellaceae	g__Prevotella	s__Prevotella_copri
Otu636	4	879	0.00143611	6.34e-12	M3	Peripheral nodes	k__Bacteria	p__Bacteroidetes	c__Bacteroidia	o__Bacteroidales	f__Bacteroidaceae	g__Bacteroides	s__
Otu15713	1	0	0.638203	6.53e-18	M11	Peripheral nodes	k__Bacteria	p__Firmicutes	c__Clostridia	o__Clostridiales	f__Lachnospiraceae	g__	s__
Otu3226	43	57	0.00138027	0.824322	M2	Peripheral nodes	k__Bacteria	p__Proteobacteria	c__Gammaproteobacteria	o__Thiotrichales	f__Piscirickettsiaceae	g__Thioalkalimicrobium	s__
Otu31300	1	0	1.6372	8.71e-18	M27	NA	k__Bacteria	p__Firmicutes	c__Clostridia	o__Clostridiales	f__Clostridiaceae	g__SMB53	s__
Otu775	2	222	0.00140516	1.27e-12	M3	Peripheral nodes	k__Bacteria	p__Bacteroidetes	c__Bacteroidia	o__Bacteroidales	f__Bacteroidaceae	g__Bacteroides	s__
Otu78	4	6	0.491232	3.48e-17	M6	Peripheral nodes	k__Bacteria	p__Spirochaetes	c__Spirochaetes	o__Spirochaetales	f__Spirochaetaceae	g__Treponema	s__
Otu7789	6	216	0.00193596	3.22e-09	M1	Peripheral nodes	k__Bacteria	p__Firmicutes	c__Clostridia	o__Clostridiales	f__Ruminococcaceae	g__Oscillospira	s__
Otu7780	6	222	0.001821	1.68e-09	M1	Peripheral nodes	k__Bacteria	p__Firmicutes	c__Clostridia	o__Clostridiales	f__Lachnospiraceae	g__Roseburia	s__
Otu504	1	0	0.615688	4.36e-18	M13	Peripheral nodes	k__Bacteria	p__Firmicutes	c__Clostridia	o__	f__	g__	s__
Otu506	3	0	0.283857	4.36e-17	M5	Peripheral nodes	k__Bacteria	p__Spirochaetes	c__Spirochaetes	o__Sphaerochaetales	f__Sphaerochaetaceae	g__Sphaerochaeta	s__
Otu3633	39	6	0.00138442	0.769013	M2	Peripheral nodes	k__Bacteria	p__Proteobacteria	c__Betaproteobacteria	o__Rhodocyclales	f__Rhodocyclaceae	g__Dechloromonas	s__
Otu19860	1	0	1.6372	8.71e-18	M27	NA	k__Bacteria	p__Firmicutes	c__Clostridia	o__Clostridiales	f__	g__	s__
Otu9676	2	0	0.00176087	2.72e-08	M4	Peripheral nodes	k__Bacteria	p__Bacteroidetes	c__Bacteroidia	o__Bacteroidales	f__Prevotellaceae	g__Prevotella	s__
Otu7040	1	0	0.0017048	9.14e-10	M1	Peripheral nodes	k__Bacteria	p__Lentisphaerae	c__Lentisphaeria	o__Z20	f__R4-45B	g__	s__
Otu7042	5	9	0.00204173	8.03e-08	M1	Peripheral nodes	k__Bacteria	p__Firmicutes	c__Clostridia	o__Clostridiales	f__	g__	s__
Otu7753	1	0	0.622432	8.71e-18	M17	Peripheral nodes	k__Bacteria	p__Firmicutes	c__Clostridia	o__Clostridiales	f__Lachnospiraceae	g__	s__
Otu7754	3	0	0.00133042	4.01e-12	M8	NA	k__Bacteria	p__Firmicutes	c__Clostridia	o__Clostridiales	f__Ruminococcaceae	g__Oscillospira	s__
Otu7755	13	369	0.00196573	8.52e-09	M1	Peripheral nodes	k__Bacteria	p__Firmicutes	c__Clostridia	o__Clostridiales	f__Ruminococcaceae	g__Oscillospira	s__
Otu1163	1	0	0.00191665	3.19e-07	M4	Peripheral nodes	k__Bacteria	p__Bacteroidetes	c__Bacteroidia	o__Bacteroidales	f__	g__	s__
Otu1162	3	0	0.00142065	6.91e-12	M3	Peripheral nodes	k__Bacteria	p__Bacteroidetes	c__Bacteroidia	o__Bacteroidales	f__Paraprevotellaceae	g__CF231	s__
Otu15696	3	0	0.00175119	2.27e-09	M1	Peripheral nodes	k__Bacteria	p__Firmicutes	c__Clostridia	o__Clostridiales	f__Lachnospiraceae	g__Coprococcus	s__
Otu15693	1	0	0.00160748	3.83e-11	M1	Peripheral nodes	k__Bacteria	p__Firmicutes	c__Clostridia	o__Clostridiales	f__Lachnospiraceae	g__Blautia	s__Blautia_producta
Otu128	1	0	1.87652	1.09e-17	M20	NA	k__Bacteria	p__Firmicutes	c__Erysipelotrichi	o__Erysipelotrichales	f__Erysipelotrichaceae	g__RFN20	s__
Otu7094	18	0	0.00139983	0.38526	M2	Peripheral nodes	k__Bacteria	p__Proteobacteria	c__Deltaproteobacteria	o__Myxococcales	f__0319-6G20	g__	s__
Otu28852	27	0	0.00139497	0.565275	M2	Peripheral nodes	k__Bacteria	p__Proteobacteria	c__Alphaproteobacteria	o__Sphingomonadales	f__Sphingomonadaceae	g__Kaistobacter	s__
Otu28578	4	0	0.00150673	0.0170296	M2	Peripheral nodes	k__Bacteria	p__Firmicutes	c__Clostridia	o__Clostridiales	f__Lachnospiraceae	g__Lachnospira	s__
Otu20748	49	983	0.00162517	0.91486	M2	Peripheral nodes	k__Bacteria	p__Actinobacteria	c__Actinobacteria	o__Actinomycetales	f__Mycobacteriaceae	g__Mycobacterium	s__
Otu10140	6	10270	0.00206975	0.0108496	M4	Peripheral nodes	k__Bacteria	p__Bacteroidetes	c__Bacteroidia	o__Bacteroidales	f__Prevotellaceae	g__Prevotella	s__Prevotella_copri
Otu4819	2	0	0.827541	1.74e-17	M16	NA	k__Bacteria	p__Spirochaetes	c__Spirochaetes	o__Spirochaetales	f__Spirochaetaceae	g__Treponema	s__
Otu25363	1	0	0.00158013	4.25e-10	M3	Peripheral nodes	k__Bacteria	p__Firmicutes	c__Clostridia	o__Clostridiales	f__Ruminococcaceae	g__	s__
Otu7540	2	0	0.0016074	4.66e-10	M3	Peripheral nodes	k__Bacteria	p__Firmicutes	c__Clostridia	o__Clostridiales	f__Ruminococcaceae	g__	s__
Otu8257	1	0	0.643749	4.36e-18	M11	Peripheral nodes	k__Bacteria	p__Firmicutes	c__Clostridia	o__Clostridiales	f__Lachnospiraceae	g__	s__
Otu24647	11	57	0.00212218	1.73e-08	M1	Peripheral nodes	k__Bacteria	p__Firmicutes	c__Clostridia	o__Clostridiales	f__Ruminococcaceae	g__Oscillospira	s__
Otu1259	1	0	0.614553	8.71e-18	M13	Peripheral nodes	k__Bacteria	p__Bacteroidetes	c__Bacteroidia	o__Bacteroidales	f__Paraprevotellaceae	g__YRC22	s__
Otu86	2	2	0.451916	1.74e-17	M10	Peripheral nodes	k__Bacteria	p__Spirochaetes	c__Spirochaetes	o__Spirochaetales	f__Spirochaetaceae	g__Treponema	s__
Otu85	1	0	0.309444	2.18e-18	M10	Peripheral nodes	k__Bacteria	p__Spirochaetes	c__Spirochaetes	o__Spirochaetales	f__Spirochaetaceae	g__Treponema	s__
Otu15613	4	26	0.00178925	4.52e-08	M4	Peripheral nodes	k__Bacteria	p__Bacteroidetes	c__Bacteroidia	o__Bacteroidales	f__Prevotellaceae	g__Prevotella	s__
Otu1874	1	0	0.281041	4.36e-18	M6	Peripheral nodes	k__Bacteria	p__Spirochaetes	c__Spirochaetes	o__Spirochaetales	f__Spirochaetaceae	g__Treponema	s__
Otu3358	21	0	0.00139559	0.445273	M2	Peripheral nodes	k__Bacteria	p__Proteobacteria	c__Betaproteobacteria	o__Rhodocyclales	f__Rhodocyclaceae	g__Dechloromonas	s__
Otu8099	2	0	0.00171508	8.43e-10	M1	Peripheral nodes	k__Bacteria	p__Firmicutes	c__Clostridia	o__Clostridiales	f__Ruminococcaceae	g__	s__
Otu608	1	0	1.89179	8.71e-18	M19	NA	k__Bacteria	p__Bacteroidetes	c__Bacteroidia	o__Bacteroidales	f__	g__	s__
Otu603	4	662	0.00165278	6.46e-10	M9	Peripheral nodes	k__Bacteria	p__Bacteroidetes	c__Bacteroidia	o__Bacteroidales	f__BS11	g__	s__
Otu23102	6	35	0.00195252	5.74e-09	M1	Peripheral nodes	k__Bacteria	p__Firmicutes	c__Clostridia	o__Clostridiales	f__Ruminococcaceae	g__Oscillospira	s__
Otu28488	6	0	0.0014919	0.0245841	M2	Peripheral nodes	k__Bacteria	p__Firmicutes	c__Clostridia	o__Clostridiales	f__Ruminococcaceae	g__	s__
Otu7758	1	0	0.00139639	1.43e-11	M9	Peripheral nodes	k__Bacteria	p__Cyanobacteria	c__4C0d-2	o__YS2	f__	g__	s__
Otu15870	9	46	0.00186149	8.1e-09	M1	Peripheral nodes	k__Bacteria	p__Firmicutes	c__Clostridia	o__Clostridiales	f__Lachnospiraceae	g__Coprococcus	s__
Otu15872	2	0	0.00180813	2.02e-09	M1	Peripheral nodes	k__Bacteria	p__Firmicutes	c__Clostridia	o__Clostridiales	f__Lachnospiraceae	g__	s__
Otu9741	1	0	0.00142691	2.74e-11	M3	Peripheral nodes	k__Bacteria	p__Bacteroidetes	c__Bacteroidia	o__Bacteroidales	f__Prevotellaceae	g__Prevotella	s__
Otu1511	1	0	0.00176452	6.7e-10	M1	Peripheral nodes	k__Bacteria	p__Bacteroidetes	c__Bacteroidia	o__Bacteroidales	f__	g__	s__
Otu21718	2	0	0.0016427	3.04e-09	M1	Peripheral nodes	k__Bacteria	p__Firmicutes	c__Clostridia	o__Clostridiales	f__Ruminococcaceae	g__	s__
Otu674	4	1	0.00139531	7.65e-12	M3	Peripheral nodes	k__Bacteria	p__Bacteroidetes	c__Bacteroidia	o__Bacteroidales	f__Prevotellaceae	g__Prevotella	s__
Otu8671	3	443	0.00121971	1.59e-13	M3	Peripheral nodes	k__Bacteria	p__Bacteroidetes	c__Bacteroidia	o__Bacteroidales	f__Bacteroidaceae	g__Bacteroides	s__
Otu682	16	1684	0.00170097	2.07e-10	M3	Module hubs	k__Bacteria	p__Bacteroidetes	c__Bacteroidia	o__Bacteroidales	f__Prevotellaceae	g__Prevotella	s__
Otu687	7	2390	0.00224368	2.94e-08	M1	Peripheral nodes	k__Bacteria	p__Bacteroidetes	c__Bacteroidia	o__Bacteroidales	f__Prevotellaceae	g__Prevotella	s__
Otu684	10	314	0.00227176	1.03e-06	M4	Peripheral nodes	k__Bacteria	p__Bacteroidetes	c__Bacteroidia	o__Bacteroidales	f__Prevotellaceae	g__Prevotella	s__
Otu15746	48	366	0.00162078	0.899973	M2	Peripheral nodes	k__Bacteria	p__Bacteroidetes	c__Bacteroidia	o__Bacteroidales	f__S24-7	g__	s__
Otu15744	1	0	0.0016098	1.41e-10	M1	Peripheral nodes	k__Bacteria	p__Firmicutes	c__Clostridia	o__Clostridiales	f__Lachnospiraceae	g__	s__
Otu803	1	0	0.00147358	3.03e-11	M1	Peripheral nodes	k__Bacteria	p__Bacteroidetes	c__Bacteroidia	o__Bacteroidales	f__Prevotellaceae	g__Prevotella	s__
Otu11086	4	9966	0.00227434	0.00024854	M4	Peripheral nodes	k__Bacteria	p__Bacteroidetes	c__Bacteroidia	o__Bacteroidales	f__Prevotellaceae	g__Prevotella	s__Prevotella_copri
Otu8733	16	986	0.00225919	4.65e-08	M1	Peripheral nodes	k__Bacteria	p__Firmicutes	c__Clostridia	o__Clostridiales	f__Lachnospiraceae	g__Roseburia	s__
Otu7425	3	0	0.00205163	4.53e-08	M1	Peripheral nodes	k__Bacteria	p__Firmicutes	c__Clostridia	o__Clostridiales	f__Ruminococcaceae	g__	s__
Otu3438	26	0	0.00139911	0.537014	M2	Peripheral nodes	k__Bacteria	p__Proteobacteria	c__Gammaproteobacteria	o__Alteromonadales	f__Chromatiaceae	g__	s__
Otu1139	2	1	0.922679	8.71e-18	M13	Peripheral nodes	k__Bacteria	p__Bacteroidetes	c__Bacteroidia	o__Bacteroidales	f__Paraprevotellaceae	g__YRC22	s__
Otu1136	3	255	0.00159095	3.85e-11	M1	Peripheral nodes	k__Bacteria	p__Bacteroidetes	c__Bacteroidia	o__Bacteroidales	f__S24-7	g__	s__
Otu870	10	297	0.00225654	1.13e-06	M4	Peripheral nodes	k__Bacteria	p__Bacteroidetes	c__Bacteroidia	o__Bacteroidales	f__Prevotellaceae	g__Prevotella	s__
Otu5889	40	3	0.00137549	0.803235	M2	Peripheral nodes	k__Bacteria	p__Firmicutes	c__Bacilli	o__Bacillales	f__Paenibacillaceae	g__Paenibacillus	s__
Otu10631	7	159	0.00174662	0.020349	M2	Peripheral nodes	k__Bacteria	p__Bacteroidetes	c__Bacteroidia	o__Bacteroidales	f__Prevotellaceae	g__Prevotella	s__Prevotella_copri
Otu28607	12	0	0.00139726	0.264101	M2	Peripheral nodes	k__Bacteria	p__Proteobacteria	c__Alphaproteobacteria	o__Rhodobacterales	f__Rhodobacteraceae	g__	s__
Otu18366	2	0	0.00172034	1.52e-09	M1	Peripheral nodes	k__Bacteria	p__Bacteroidetes	c__Bacteroidia	o__Bacteroidales	f__	g__	s__
Otu7355	2	0	0.00201198	5.37e-08	M1	Peripheral nodes	k__Bacteria	p__Firmicutes	c__Clostridia	o__Clostridiales	f__Ruminococcaceae	g__	s__
Otu351	43	11	0.00137608	0.837818	M2	Peripheral nodes	k__Bacteria	p__Firmicutes	c__Bacilli	o__Bacillales	f__Planococcaceae	g__Sporosarcina	s__
Otu3325	28	0	0.00139551	0.578604	M2	Peripheral nodes	k__Bacteria	p__Proteobacteria	c__Gammaproteobacteria	o__Pseudomonadales	f__Pseudomonadaceae	g__	s__
Otu650	4	443	0.00142289	9.06e-12	M3	Peripheral nodes	k__Bacteria	p__Bacteroidetes	c__Bacteroidia	o__Bacteroidales	f__Prevotellaceae	g__Prevotella	s__
Otu653	1	0	1.89179	1.09e-17	M19	NA	k__Bacteria	p__Bacteroidetes	c__Bacteroidia	o__Bacteroidales	f__	g__	s__
Otu11504	7	499	0.00194589	2.03e-09	M3	Peripheral nodes	k__Bacteria	p__Bacteroidetes	c__Bacteroidia	o__Bacteroidales	f__Prevotellaceae	g__Prevotella	s__
Otu7516	10	239	0.00207209	8.6e-08	M1	Peripheral nodes	k__Bacteria	p__Firmicutes	c__Clostridia	o__Clostridiales	f__	g__	s__
Otu24793	3	0	0.00203501	3.13e-08	M1	Peripheral nodes	k__Bacteria	p__Firmicutes	c__Clostridia	o__Clostridiales	f__	g__	s__
Otu22060	1	0	1.93836	6.53e-18	M18	NA	k__Bacteria	p__Firmicutes	c__Clostridia	o__Clostridiales	f__Ruminococcaceae	g__	s__
Otu21086	25	2220	0.00236512	1.14e-06	M1	Peripheral nodes	k__Bacteria	p__Firmicutes	c__Clostridia	o__Clostridiales	f__	g__	s__
Otu9526	1	0	0.00119178	2.46e-13	M3	Peripheral nodes	k__Bacteria	p__Bacteroidetes	c__Bacteroidia	o__Bacteroidales	f__Prevotellaceae	g__Prevotella	s__
Otu15738	14	1331	0.00197334	6.21e-09	M1	Peripheral nodes	k__Bacteria	p__Firmicutes	c__Clostridia	o__Clostridiales	f__Lachnospiraceae	g__	s__
Otu3203	42	16	0.00138057	0.817291	M2	Peripheral nodes	k__Bacteria	p__Proteobacteria	c__Gammaproteobacteria	o__Pseudomonadales	f__Pseudomonadaceae	g__Serpens	s__Serpens_flexibilis
Otu7743	24	1522	0.00204	2.75e-08	M1	Peripheral nodes	k__Bacteria	p__Firmicutes	c__Clostridia	o__Clostridiales	f__Ruminococcaceae	g__Oscillospira	s__
Otu220	52	1	0.00160139	0.95767	M2	Peripheral nodes	k__Bacteria	p__Proteobacteria	c__Betaproteobacteria	o__Burkholderiales	f__Comamonadaceae	g__Comamonas	s__
Otu1107	5	710	0.00185155	1.49e-09	M1	Peripheral nodes	k__Bacteria	p__Bacteroidetes	c__Bacteroidia	o__Bacteroidales	f__	g__	s__
Otu10933	6	0	0.00151931	0.019624	M2	Peripheral nodes	k__Bacteria	p__Bacteroidetes	c__Bacteroidia	o__Bacteroidales	f__Prevotellaceae	g__Prevotella	s__Prevotella_copri
Otu10931	18	97	0.0015823	0.197992	M2	Peripheral nodes	k__Bacteria	p__Bacteroidetes	c__Bacteroidia	o__Bacteroidales	f__Prevotellaceae	g__Prevotella	s__Prevotella_copri
Otu17051	1	0	1.77651	8.71e-18	M24	NA	k__Bacteria	p__Firmicutes	c__Clostridia	o__Clostridiales	f__Lachnospiraceae	g__Coprococcus	s__
Otu21823	4	132	0.00188263	4.8e-08	M1	Peripheral nodes	k__Bacteria	p__Firmicutes	c__Clostridia	o__Clostridiales	f__Ruminococcaceae	g__	s__
Otu525	2	0	0.00207494	6.2e-06	M4	Peripheral nodes	k__Bacteria	p__Firmicutes	c__Clostridia	o__Clostridiales	f__Veillonellaceae	g__Anaerovibrio	s__
Otu15961	5	194	0.00158448	1.71e-11	M3	Peripheral nodes	k__Bacteria	p__Firmicutes	c__Clostridia	o__Clostridiales	f__Lachnospiraceae	g__	s__
Otu21330	1	0	0.00202819	2.54e-08	M1	Peripheral nodes	k__Bacteria	p__Firmicutes	c__Clostridia	o__Clostridiales	f__Ruminococcaceae	g__	s__
Otu1186	2	0	0.00132506	1.97e-11	M9	Peripheral nodes	k__Bacteria	p__Bacteroidetes	c__	o__	f__	g__	s__
Otu3126	34	0	0.00138842	0.695788	M2	Peripheral nodes	k__Bacteria	p__Proteobacteria	c__Gammaproteobacteria	o__Pseudomonadales	f__Pseudomonadaceae	g__	s__
Otu3125	52	2	0.00159874	1	M2	Peripheral nodes	k__Bacteria	p__Proteobacteria	c__Gammaproteobacteria	o__Alteromonadales	f__Chromatiaceae	g__Alishewanella	s__
Otu16017	3	0	0.00152057	0.0095959	M2	Peripheral nodes	k__Bacteria	p__Firmicutes	c__Clostridia	o__Clostridiales	f__Lachnospiraceae	g__	s__
Otu16019	3	0	0.0018076	1.41e-09	M1	Peripheral nodes	k__Bacteria	p__Firmicutes	c__Clostridia	o__Clostridiales	f__Lachnospiraceae	g__	s__
Otu9176	2	0	0.939232	2.18e-17	M15	NA	k__Bacteria	p__Cyanobacteria	c__4C0d-2	o__YS2	f__	g__	s__
Otu15673	2	1	0.945448	8.71e-18	M17	Peripheral nodes	k__Bacteria	p__Firmicutes	c__Clostridia	o__Clostridiales	f__Lachnospiraceae	g__	s__
Otu15671	1	0	1.77651	6.53e-18	M24	NA	k__Bacteria	p__Firmicutes	c__Clostridia	o__Clostridiales	f__Lachnospiraceae	g__Coprococcus	s__
Otu15678	1	0	0.00152813	3.32e-10	M1	Peripheral nodes	k__Bacteria	p__Firmicutes	c__Clostridia	o__Clostridiales	f__Lachnospiraceae	g__	s__
Otu145	47	36	0.00161685	0.889723	M2	Peripheral nodes	k__Bacteria	p__Proteobacteria	c__Gammaproteobacteria	o__Pseudomonadales	f__Pseudomonadaceae	g__Pseudomonas	s__
Otu13142	1	0	1.99521	4.36e-18	M31	NA	k__Bacteria	p__Bacteroidetes	c__Bacteroidia	o__Bacteroidales	f__Prevotellaceae	g__Prevotella	s__
Otu9486	7	210	0.00163341	1.67e-10	M3	Peripheral nodes	k__Bacteria	p__Bacteroidetes	c__Bacteroidia	o__Bacteroidales	f__Prevotellaceae	g__Prevotella	s__
Otu13380	1	0	0.00121953	2.11e-13	M3	Peripheral nodes	k__Bacteria	p__Bacteroidetes	c__Bacteroidia	o__Bacteroidales	f__Prevotellaceae	g__Prevotella	s__
Otu18913	7	1028	0.00211472	2.93e-08	M1	Peripheral nodes	k__Bacteria	p__Bacteroidetes	c__Bacteroidia	o__Bacteroidales	f__	g__	s__
Otu7842	4	660	0.00159841	1.51e-10	M8	NA	k__Bacteria	p__Firmicutes	c__Clostridia	o__Clostridiales	f__Ruminococcaceae	g__Oscillospira	s__
Otu17153	44	1318	0.00160777	0.809153	M2	Peripheral nodes	k__Bacteria	p__Proteobacteria	c__Alphaproteobacteria	o__Sphingomonadales	f__Sphingomonadaceae	g__Kaistobacter	s__
Otu661	1	0	1.78667	2.18e-18	M23	NA	k__Bacteria	p__Bacteroidetes	c__Bacteroidia	o__Bacteroidales	f__Porphyromonadaceae	g__Parabacteroides	s__
Otu667	2	0	0.00188379	8.85e-10	M1	Peripheral nodes	k__Bacteria	p__Bacteroidetes	c__Bacteroidia	o__Bacteroidales	f__Prevotellaceae	g__Prevotella	s__
Otu599	1	0	0.0017973	1.05e-09	M1	Peripheral nodes	k__Bacteria	p__Bacteroidetes	c__Bacteroidia	o__Bacteroidales	f__	g__	s__
Otu626	1	0	1.99521	4.36e-18	M31	NA	k__Bacteria	p__Bacteroidetes	c__Bacteroidia	o__Bacteroidales	f__Prevotellaceae	g__Prevotella	s__
Otu628	1	0	0.00134534	8.8e-13	M1	Peripheral nodes	k__Bacteria	p__Bacteroidetes	c__Bacteroidia	o__Bacteroidales	f__	g__	s__
Otu205	33	8	0.00138666	0.680342	M2	Peripheral nodes	k__Bacteria	p__Proteobacteria	c__Gammaproteobacteria	o__Enterobacteriales	f__Enterobacteriaceae	g__	s__
Otu67	2	1	0.766871	3.05e-17	M14	Peripheral nodes	k__Bacteria	p__Firmicutes	c__Bacilli	o__Lactobacillales	f__Lactobacillaceae	g__Lactobacillus	s__Lactobacillus_reuteri
Otu15816	5	327	0.00168803	4.58e-11	M3	Peripheral nodes	k__Bacteria	p__Firmicutes	c__Clostridia	o__Clostridiales	f__Lachnospiraceae	g__Blautia	s__
Otu10495	9	1582	0.00195963	2.06e-09	M3	Peripheral nodes	k__Bacteria	p__Bacteroidetes	c__Bacteroidia	o__Bacteroidales	f__Prevotellaceae	g__Prevotella	s__
Otu1531	2	0	0.00151312	0.00868321	M2	Peripheral nodes	k__Bacteria	p__Bacteroidetes	c__Bacteroidia	o__Bacteroidales	f__S24-7	g__	s__
Otu5948	20	0	0.00139776	0.42917	M2	Peripheral nodes	k__Bacteria	p__Firmicutes	c__Bacilli	o__Bacillales	f__Paenibacillaceae	g__Paenibacillus	s__
Otu482	3	0	0.303499	3.48e-17	M5	Peripheral nodes	k__Bacteria	p__Spirochaetes	c__Spirochaetes	o__Sphaerochaetales	f__Sphaerochaetaceae	g__Sphaerochaeta	s__
Otu483	2	0	0.289101	4.36e-18	M5	Peripheral nodes	k__Bacteria	p__Spirochaetes	c__Spirochaetes	o__Sphaerochaetales	f__Sphaerochaetaceae	g__Sphaerochaeta	s__
Otu485	1	0	0.00157643	4.24e-11	M1	Peripheral nodes	k__Bacteria	p__Firmicutes	c__Erysipelotrichi	o__Erysipelotrichales	f__Erysipelotrichaceae	g__	s__
Otu488	20	1087	0.00215567	8.1e-08	M1	Peripheral nodes	k__Bacteria	p__Firmicutes	c__Clostridia	o__Clostridiales	f__Veillonellaceae	g__Anaerovibrio	s__
Otu510	1	0	0.00168543	2.09e-09	M1	Peripheral nodes	k__Bacteria	p__Firmicutes	c__Clostridia	o__Clostridiales	f__Veillonellaceae	g__Anaerovibrio	s__
Otu7750	6	11	0.00199119	1.62e-08	M1	Peripheral nodes	k__Bacteria	p__Firmicutes	c__Clostridia	o__Clostridiales	f__	g__	s__
Otu707	3	0	0.00156081	2.66e-11	M3	Peripheral nodes	k__Bacteria	p__Bacteroidetes	c__Bacteroidia	o__Bacteroidales	f__Prevotellaceae	g__Prevotella	s__
Otu21306	52	4	0.00160651	0.984776	M2	Peripheral nodes	k__Bacteria	p__Fusobacteria	c__Fusobacteriia	o__Fusobacteriales	f__Fusobacteriaceae	g__Cetobacterium	s__Cetobacterium_somerae
Otu1151	1	0	1.53988	1.09e-17	M29	NA	k__Bacteria	p__Bacteroidetes	c__Bacteroidia	o__Bacteroidales	f__Paraprevotellaceae	g__CF231	s__
Otu858	2	0	0.00137623	1.62e-11	M9	Peripheral nodes	k__Bacteria	p__Bacteroidetes	c__Bacteroidia	o__Bacteroidales	f__	g__	s__
Otu9142	7	334	0.00225992	0.000258346	M4	Peripheral nodes	k__Bacteria	p__Bacteroidetes	c__Bacteroidia	o__Bacteroidales	f__Prevotellaceae	g__Prevotella	s__Prevotella_copri
Otu15688	1	0	0.00159955	3.93e-11	M1	Peripheral nodes	k__Bacteria	p__Firmicutes	c__Clostridia	o__Clostridiales	f__Lachnospiraceae	g__Dorea	s__
Otu15684	51	0	0.00160601	0.975129	M2	Peripheral nodes	k__Bacteria	p__Bacteroidetes	c__Bacteroidia	o__Bacteroidales	f__Paraprevotellaceae	g__CF231	s__
Otu735	6	0	0.00196892	1.01e-06	M4	Peripheral nodes	k__Bacteria	p__Bacteroidetes	c__Bacteroidia	o__Bacteroidales	f__Prevotellaceae	g__Prevotella	s__
Otu20750	19	0	0.0013996	0.407513	M2	Peripheral nodes	k__Bacteria	p__Actinobacteria	c__Actinobacteria	o__Actinomycetales	f__Nocardiaceae	g__Rhodococcus	s__Rhodococcus_ruber
Otu1750	1	0	0.280615	4.36e-18	M6	Peripheral nodes	k__Bacteria	p__Spirochaetes	c__Spirochaetes	o__Spirochaetales	f__Spirochaetaceae	g__Treponema	s__
Otu15914	23	1941	0.00235425	4.27e-07	M1	Peripheral nodes	k__Bacteria	p__Firmicutes	c__Clostridia	o__Clostridiales	f__Lachnospiraceae	g__	s__
Otu8913	1	0	0.0016579	6.17e-10	M1	Peripheral nodes	k__Bacteria	p__Firmicutes	c__Clostridia	o__Clostridiales	f__Ruminococcaceae	g__	s__
Otu6989	2	0	0.00174471	8.85e-10	M1	Peripheral nodes	k__Bacteria	p__Firmicutes	c__Clostridia	o__Clostridiales	f__Ruminococcaceae	g__	s__
Otu6981	13	926	0.00223207	3.68e-08	M1	Peripheral nodes	k__Bacteria	p__Firmicutes	c__Clostridia	o__Clostridiales	f__Ruminococcaceae	g__	s__
Otu6986	16	1016	0.00224105	7.38e-07	M1	Peripheral nodes	k__Bacteria	p__Firmicutes	c__Clostridia	o__Clostridiales	f__Ruminococcaceae	g__	s__
Otu6987	2	0	0.00152853	0.0133015	M2	Peripheral nodes	k__Bacteria	p__Fusobacteria	c__Fusobacteriia	o__Fusobacteriales	f__Fusobacteriaceae	g__	s__
Otu31461	11	0	0.00139441	0.243261	M2	Peripheral nodes	k__Bacteria	p__Firmicutes	c__Clostridia	o__Clostridiales	f__Peptostreptococcaceae	g__	s__
Otu8799	25	0	0.00139805	0.524752	M2	Peripheral nodes	k__Bacteria	p__Bacteroidetes	c__Bacteroidia	o__Bacteroidales	f__Prevotellaceae	g__Prevotella	s__
Otu783	3	0	0.00142592	6.58e-12	M3	Peripheral nodes	k__Bacteria	p__Bacteroidetes	c__Bacteroidia	o__Bacteroidales	f__Prevotellaceae	g__Prevotella	s__
Otu28665	6	8	0.00179337	3.9e-09	M1	Peripheral nodes	k__Bacteria	p__Firmicutes	c__Clostridia	o__Clostridiales	f__Lachnospiraceae	g__Roseburia	s__
Otu422	52	1	0.00160002	0.990225	M2	Peripheral nodes	k__Bacteria	p__Proteobacteria	c__Betaproteobacteria	o__Burkholderiales	f__Oxalobacteraceae	g__Ralstonia	s__
Otu4564	2	0	0.841114	8.71e-18	M16	NA	k__Bacteria	p__Spirochaetes	c__Spirochaetes	o__Spirochaetales	f__Spirochaetaceae	g__Treponema	s__
Otu2595	1	0	0.298045	4.36e-18	M10	Peripheral nodes	k__Bacteria	p__Spirochaetes	c__Spirochaetes	o__Spirochaetales	f__Spirochaetaceae	g__Treponema	s__
Otu679	2	0	0.00180215	2.01e-09	M1	Peripheral nodes	k__Bacteria	p__Bacteroidetes	c__Bacteroidia	o__Bacteroidales	f__Prevotellaceae	g__Prevotella	s__
Otu678	1	0	0.00123057	1.47e-13	M3	Peripheral nodes	k__Bacteria	p__Bacteroidetes	c__Bacteroidia	o__Bacteroidales	f__Bacteroidaceae	g__Bacteroides	s__
Otu673	3	0	0.00206701	2.79e-08	M1	Peripheral nodes	k__Bacteria	p__Bacteroidetes	c__Bacteroidia	o__Bacteroidales	f__Prevotellaceae	g__Prevotella	s__
Otu22497	6	234	0.00211297	4.2e-08	M1	Peripheral nodes	k__Bacteria	p__Firmicutes	c__Clostridia	o__Clostridiales	f__Ruminococcaceae	g__Oscillospira	s__
Otu29299	1	0	0.638366	4.36e-18	M17	Peripheral nodes	k__Bacteria	p__Firmicutes	c__Clostridia	o__Clostridiales	f__Lachnospiraceae	g__	s__
Otu37	2	2	0.451916	4.36e-18	M10	Peripheral nodes	k__Bacteria	p__Spirochaetes	c__Spirochaetes	o__Spirochaetales	f__Spirochaetaceae	g__Treponema	s__
Otu7749	2	110	0.00163632	2.03e-10	M1	Peripheral nodes	k__Bacteria	p__Firmicutes	c__Clostridia	o__Clostridiales	f__Ruminococcaceae	g__Oscillospira	s__
Otu7748	16	364	0.00198496	1.07e-08	M1	Peripheral nodes	k__Bacteria	p__Firmicutes	c__Clostridia	o__Clostridiales	f__Ruminococcaceae	g__Oscillospira	s__
Otu15865	22	0	0.00139774	0.464072	M2	Peripheral nodes	k__Bacteria	p__Bacteroidetes	c__Bacteroidia	o__Bacteroidales	f__Paraprevotellaceae	g__CF231	s__
Otu7839	3	0	0.00131881	4.21e-12	M8	NA	k__Bacteria	p__Firmicutes	c__Clostridia	o__Clostridiales	f__Ruminococcaceae	g__Oscillospira	s__
Otu7834	43	29	0.00138043	0.831386	M2	Peripheral nodes	k__Bacteria	p__Cyanobacteria	c__Chloroplast	o__Streptophyta	f__	g__	s__
Otu19824	4	0	0.00194347	1.54e-08	M1	Peripheral nodes	k__Bacteria	p__Firmicutes	c__Clostridia	o__Clostridiales	f__Ruminococcaceae	g__	s__
Otu9879	1	0	0.00143049	0.000688789	M2	Peripheral nodes	k__Bacteria	p__Bacteroidetes	c__Bacteroidia	o__Bacteroidales	f__Prevotellaceae	g__Prevotella	s__
Otu22626	1	0	1.93836	4.36e-18	M18	NA	k__Bacteria	p__Firmicutes	c__Clostridia	o__Clostridiales	f__Ruminococcaceae	g__	s__
Otu1126	1	0	0.00143153	0.000685667	M2	Peripheral nodes	k__Bacteria	p__Bacteroidetes	c__Bacteroidia	o__Bacteroidales	f__Prevotellaceae	g__Prevotella	s__Prevotella_copri
Otu244	25	0	0.00139664	0.528297	M2	Peripheral nodes	k__Bacteria	p__Firmicutes	c__Bacilli	o__Bacillales	f__Planococcaceae	g__	s__
Otu3189	50	24	0.00161785	0.947442	M2	Peripheral nodes	k__Bacteria	p__Proteobacteria	c__Gammaproteobacteria	o__Oceanospirillales	f__Oceanospirillaceae	g__Nitrincola	s__
Otu19661	6	22	0.0021023	4.17e-08	M1	Peripheral nodes	k__Bacteria	p__Firmicutes	c__Clostridia	o__Clostridiales	f__	g__	s__
Otu19662	15	476	0.00215146	8.96e-08	M1	Peripheral nodes	k__Bacteria	p__Firmicutes	c__Clostridia	o__Clostridiales	f__Mogibacteriaceae	g__	s__
Otu9639	11	7569	0.00243214	1.25e-05	M4	Peripheral nodes	k__Bacteria	p__Bacteroidetes	c__Bacteroidia	o__Bacteroidales	f__Prevotellaceae	g__Prevotella	s__Prevotella_copri
Otu9090	1	0	0.601649	8.71e-18	M12	Peripheral nodes	k__Bacteria	p__Bacteroidetes	c__Bacteroidia	o__Bacteroidales	f__Porphyromonadaceae	g__Parabacteroides	s__
Otu8941	2	0	0.904895	1.74e-17	M15	NA	k__Bacteria	p__Cyanobacteria	c__4C0d-2	o__YS2	f__	g__	s__
Otu1393	10	767	0.00219869	3.01e-08	M1	Peripheral nodes	k__Bacteria	p__Bacteroidetes	c__Bacteroidia	o__Bacteroidales	f__	g__	s__
Otu7009	10	152	0.00202999	9e-08	M1	Peripheral nodes	k__Bacteria	p__Firmicutes	c__Clostridia	o__Clostridiales	f__	g__	s__
Otu7001	6	0	0.00208889	4.37e-08	M1	Peripheral nodes	k__Bacteria	p__Firmicutes	c__Clostridia	o__Clostridiales	f__Ruminococcaceae	g__	s__
Otu7006	4	107	0.00191416	3.1e-09	M1	Peripheral nodes	k__Bacteria	p__Firmicutes	c__Clostridia	o__Clostridiales	f__Ruminococcaceae	g__Oscillospira	s__
Otu7007	7	83	0.00197143	1.71e-08	M1	Peripheral nodes	k__Bacteria	p__Firmicutes	c__Clostridia	o__Clostridiales	f__Christensenellaceae	g__	s__
Otu2869	1	0	0.279345	6.53e-18	M6	Peripheral nodes	k__Bacteria	p__Spirochaetes	c__Spirochaetes	o__Spirochaetales	f__Spirochaetaceae	g__Treponema	s__
Otu1000	26	0	0.00139972	0.540222	M2	Peripheral nodes	k__Bacteria	p__Bacteroidetes	c__Bacteroidia	o__Bacteroidales	f__	g__	s__
Otu983	1	0	0.0019447	2.99e-07	M4	Peripheral nodes	k__Bacteria	p__Bacteroidetes	c__Bacteroidia	o__Bacteroidales	f__Prevotellaceae	g__Prevotella	s__Prevotella_copri
Otu21563	11	433	0.0020581	9.81e-08	M1	Peripheral nodes	k__Bacteria	p__Firmicutes	c__Clostridia	o__Clostridiales	f__Ruminococcaceae	g__	s__
Otu9012	6	0	0.00149563	0.0243807	M2	Peripheral nodes	k__Bacteria	p__Bacteroidetes	c__Bacteroidia	o__Bacteroidales	f__Prevotellaceae	g__Prevotella	s__Prevotella_copri
Otu645	7	544	0.00193335	4.07e-08	M4	Peripheral nodes	k__Bacteria	p__Bacteroidetes	c__Bacteroidia	o__Bacteroidales	f__Prevotellaceae	g__Prevotella	s__
Otu643	12	694	0.00221406	1.15e-06	M4	Peripheral nodes	k__Bacteria	p__Bacteroidetes	c__Bacteroidia	o__Bacteroidales	f__Prevotellaceae	g__Prevotella	s__
Otu640	15	619	0.00170533	0.030722	M2	Peripheral nodes	k__Bacteria	p__Bacteroidetes	c__Bacteroidia	o__Bacteroidales	f__Prevotellaceae	g__Prevotella	s__Prevotella_copri
Otu648	17	200	0.00154763	0.225792	M2	Peripheral nodes	k__Bacteria	p__Bacteroidetes	c__Bacteroidia	o__Bacteroidales	f__Bacteroidaceae	g__Bacteroides	s__Bacteroides_plebeius
Otu7087	4	0	0.00203959	3.23e-08	M1	Peripheral nodes	k__Bacteria	p__Firmicutes	c__Clostridia	o__Clostridiales	f__	g__	s__
Otu7088	2	0	0.00200847	5.4e-08	M1	Peripheral nodes	k__Bacteria	p__Firmicutes	c__Clostridia	o__Clostridiales	f__	g__	s__
Otu7509	1	0	0.00168463	1.9e-09	M1	Peripheral nodes	k__Bacteria	p__Firmicutes	c__Clostridia	o__Clostridiales	f__	g__	s__
Otu3539	47	3120	0.00162229	0.892211	M2	Peripheral nodes	k__Bacteria	p__Proteobacteria	c__Gammaproteobacteria	o__Vibrionales	f__Pseudoalteromonadaceae	g__Vibrio	s__
Otu3299	36	19	0.0013887	0.717844	M2	Peripheral nodes	k__Bacteria	p__Proteobacteria	c__Gammaproteobacteria	o__Oceanospirillales	f__Oceanospirillaceae	g__Marinobacterium	s__
Otu3298	24	0	0.00139911	0.502894	M2	Peripheral nodes	k__Bacteria	p__Proteobacteria	c__Betaproteobacteria	o__Rhodocyclales	f__Rhodocyclaceae	g__Zoogloea	s__
Otu8158	9	176	0.00213978	6.99e-08	M1	Peripheral nodes	k__Bacteria	p__Firmicutes	c__Clostridia	o__Clostridiales	f__	g__	s__
Otu17787	1	0	1.53988	0	M29	NA	k__Bacteria	p__Bacteroidetes	c__Bacteroidia	o__Bacteroidales	f__Paraprevotellaceae	g__CF231	s__
Otu475	1	0	1.87652	1.31e-17	M20	NA	k__Bacteria	p__Firmicutes	c__Erysipelotrichi	o__Erysipelotrichales	f__Erysipelotrichaceae	g__	s__
Otu478	4	0	0.359919	3.48e-17	M5	Peripheral nodes	k__Bacteria	p__Spirochaetes	c__Spirochaetes	o__Sphaerochaetales	f__Sphaerochaetaceae	g__Sphaerochaeta	s__
Otu906	2	0	0.00202168	2.65e-08	M1	Peripheral nodes	k__Bacteria	p__Bacteroidetes	c__Bacteroidia	o__Bacteroidales	f__Prevotellaceae	g__Prevotella	s__
Otu7004	3	0	0.00180778	4.51e-09	M1	Peripheral nodes	k__Bacteria	p__Firmicutes	c__Clostridia	o__Clostridiales	f__	g__	s__
Otu15708	3	0	0.00145593	6.29e-12	M3	Peripheral nodes	k__Bacteria	p__Firmicutes	c__Clostridia	o__Clostridiales	f__Lachnospiraceae	g__	s__
Otu15702	8	481	0.00174504	0.0210606	M2	Peripheral nodes	k__Bacteria	p__Firmicutes	c__Clostridia	o__Clostridiales	f__Ruminococcaceae	g__	s__
Otu15707	2	0	0.430849	8.71e-18	M7	Peripheral nodes	k__Bacteria	p__Firmicutes	c__Clostridia	o__Clostridiales	f__Clostridiaceae	g__	s__
Otu15704	5	222	0.00189263	1.32e-08	M1	Peripheral nodes	k__Bacteria	p__Firmicutes	c__Clostridia	o__Clostridiales	f__Lachnospiraceae	g__	s__
Otu7239	1	0	0.00158508	4.18e-10	M3	Peripheral nodes	k__Bacteria	p__Firmicutes	c__Clostridia	o__Clostridiales	f__Ruminococcaceae	g__	s__
Otu3217	48	330	0.00162296	0.913166	M2	Peripheral nodes	k__Bacteria	p__Proteobacteria	c__Betaproteobacteria	o__ASSO-13	f__	g__	s__
Otu769	12	181	0.00241602	6.85e-06	M4	Peripheral nodes	k__Bacteria	p__Bacteroidetes	c__Bacteroidia	o__Bacteroidales	f__Prevotellaceae	g__Prevotella	s__Prevotella_copri
Otu26390	16	0	0.00140047	0.347023	M2	Peripheral nodes	k__Bacteria	p__Firmicutes	c__Clostridia	o__Clostridiales	f__Lachnospiraceae	g__	s__
Otu47	43	0	0.00137397	0.843242	M2	Peripheral nodes	k__Bacteria	p__Proteobacteria	c__Gammaproteobacteria	o__Pseudomonadales	f__Moraxellaceae	g__Acinetobacter	s__Acinetobacter_lwoffii
Otu43	1	0	1.68805	1.09e-17	M26	NA	k__Bacteria	p__Spirochaetes	c__Spirochaetes	o__Spirochaetales	f__Spirochaetaceae	g__Treponema	s__
Otu42	1	0	0.485319	0	M14	Peripheral nodes	k__Bacteria	p__Firmicutes	c__Bacilli	o__Lactobacillales	f__Lactobacillaceae	g__Lactobacillus	s__
Otu217	1	0	1.52858	2.18e-18	M30	NA	k__Bacteria	p__Proteobacteria	c__Betaproteobacteria	o__Burkholderiales	f__Alcaligenaceae	g__Sutterella	s__
Otu15788	5	234	0.00166269	5e-11	M3	Peripheral nodes	k__Bacteria	p__Firmicutes	c__Clostridia	o__Clostridiales	f__Lachnospiraceae	g__	s__
Otu15909	2	0	0.00174099	2.01e-09	M1	Peripheral nodes	k__Bacteria	p__Firmicutes	c__Clostridia	o__Clostridiales	f__Lachnospiraceae	g__	s__
Otu1173	3	27	0.00188445	2.22e-09	M1	Peripheral nodes	k__Bacteria	p__Bacteroidetes	c__Bacteroidia	o__Bacteroidales	f__Paraprevotellaceae	g__	s__
Otu3157	51	5	0.00160957	0.963682	M2	Peripheral nodes	k__Bacteria	p__Verrucomicrobia	c__Verrucomicrobiae	o__Verrucomicrobiales	f__Verrucomicrobiaceae	g__	s__
Otu15668	2	1	0.961446	8.71e-18	M11	Peripheral nodes	k__Bacteria	p__Firmicutes	c__Clostridia	o__Clostridiales	f__Lachnospiraceae	g__	s__
Otu153	1	0	1.79211	4.36e-18	M22	NA	k__Bacteria	p__Verrucomicrobia	c__Verruco-5	o__WCHB1-41	f__RFP12	g__	s__
Otu156	1	0	1.79211	2.18e-18	M22	NA	k__Bacteria	p__Verrucomicrobia	c__Verruco-5	o__WCHB1-41	f__RFP12	g__	s__
Otu8067	3	0	0.00134987	3.7e-12	M8	NA	k__Bacteria	p__Firmicutes	c__Clostridia	o__Clostridiales	f__Ruminococcaceae	g__Oscillospira	s__
Otu15767	28	8791	0.00184019	0.331846	M2	Peripheral nodes	k__Bacteria	p__Firmicutes	c__Clostridia	o__Clostridiales	f__Ruminococcaceae	g__Faecalibacterium	s__Faecalibacterium_prausnitzii
Otu99	17	11	0.00140533	0.353601	M2	Peripheral nodes	k__Bacteria	p__Proteobacteria	c__Gammaproteobacteria	o__Enterobacteriales	f__Enterobacteriaceae	g__Escherichia	s__Escherichia_coli
Otu90	2	0	0.445236	8.71e-18	M7	Peripheral nodes	k__Bacteria	p__Firmicutes	c__Bacilli	o__Turicibacterales	f__Turicibacteraceae	g__Turicibacter	s__
Otu3362	51	64	0.00161779	0.930823	M2	Peripheral nodes	k__Bacteria	p__Firmicutes	c__Bacilli	o__Bacillales	f__Planococcaceae	g__Sporosarcina	s__
Otu10663	1	0	1.78667	4.36e-18	M23	NA	k__Bacteria	p__Bacteroidetes	c__Bacteroidia	o__Bacteroidales	f__Porphyromonadaceae	g__Parabacteroides	s__
Otu9950	1	0	0.00106646	3.73e-15	M3	Peripheral nodes	k__Bacteria	p__Bacteroidetes	c__Bacteroidia	o__Bacteroidales	f__Bacteroidaceae	g__Bacteroides	s__
Otu612	3	222	0.00176326	1.36e-09	M1	Peripheral nodes	k__Bacteria	p__Bacteroidetes	c__Bacteroidia	o__Bacteroidales	f__Prevotellaceae	g__Prevotella	s__
Otu614	6	42	0.0017118	1.42e-09	M3	Peripheral nodes	k__Bacteria	p__Bacteroidetes	c__Bacteroidia	o__Bacteroidales	f__Prevotellaceae	g__Prevotella	s__
Otu617	3	0	0.00193523	5.05e-07	M4	Peripheral nodes	k__Bacteria	p__Bacteroidetes	c__Bacteroidia	o__Bacteroidales	f__Prevotellaceae	g__Prevotella	s__Prevotella_stercorea
Otu29760	1	0	0.001495	4e-11	M1	Peripheral nodes	k__Bacteria	p__Firmicutes	c__Clostridia	o__Clostridiales	f__Lachnospiraceae	g__Roseburia	s__
Otu1521	1	0	0.0015258	3.43e-11	M1	Peripheral nodes	k__Bacteria	p__Bacteroidetes	c__Bacteroidia	o__Bacteroidales	f__	g__	s__
Otu976	1	0	0.00180021	2.53e-08	M4	Peripheral nodes	k__Bacteria	p__Bacteroidetes	c__Bacteroidia	o__Bacteroidales	f__Prevotellaceae	g__Prevotella	s__
Otu702	2	1	0.888968	1.31e-17	M12	Peripheral nodes	k__Bacteria	p__Bacteroidetes	c__Bacteroidia	o__Bacteroidales	f__Porphyromonadaceae	g__Parabacteroides	s__
Otu6893	7	456	0.00211247	4.06e-08	M1	Peripheral nodes	k__Bacteria	p__Firmicutes	c__Clostridia	o__Clostridiales	f__	g__	s__
Otu6896	1	0	0.00168832	9.6e-10	M1	Peripheral nodes	k__Bacteria	p__Firmicutes	c__Clostridia	o__Clostridiales	f__	g__	s__
Otu11536	1	0	1.63479	6.53e-18	M28	NA	k__Bacteria	p__Firmicutes	c__Clostridia	o__Clostridiales	f__Lachnospiraceae	g__Roseburia	s__
Otu568	13	252	0.00242771	6.82e-06	M4	Peripheral nodes	k__Bacteria	p__Bacteroidetes	c__Bacteroidia	o__Bacteroidales	f__Prevotellaceae	g__Prevotella	s__
Otu15771	1	0	0.00157671	4.24e-11	M1	Peripheral nodes	k__Bacteria	p__Firmicutes	c__Clostridia	o__Clostridiales	f__Lachnospiraceae	g__Ruminococcus	s__Ruminococcus_gnavus
Otu18123	2	0	0.00166703	1.76e-09	M1	Peripheral nodes	k__Bacteria	p__Bacteroidetes	c__Bacteroidia	o__Bacteroidales	f__	g__	s__
Otu8723	1	0	1.69492	6.53e-18	M25	NA	k__Bacteria	p__Proteobacteria	c__Epsilonproteobacteria	o__Campylobacterales	f__Campylobacteraceae	g__Campylobacter	s__
Otu714	9	1243	0.00166237	5.72e-11	M3	Peripheral nodes	k__Bacteria	p__Bacteroidetes	c__Bacteroidia	o__Bacteroidales	f__Prevotellaceae	g__Prevotella	s__
Otu27470	1	0	1.63479	6.53e-18	M28	NA	k__Bacteria	p__Firmicutes	c__Clostridia	o__Clostridiales	f__Lachnospiraceae	g__Roseburia	s__
Otu1147	2	0	0.00150001	1.12e-11	M3	Peripheral nodes	k__Bacteria	p__Firmicutes	c__Erysipelotrichi	o__Erysipelotrichales	f__Erysipelotrichaceae	g__Bulleidia	s__Bulleidia_p-1630-c5
Otu30712	11	1579	0.00196703	1.69e-09	M1	Peripheral nodes	k__Bacteria	p__Firmicutes	c__Clostridia	o__Clostridiales	f__Lachnospiraceae	g__Dorea	s__
Otu108	1	0	0.00179718	2.09e-09	M1	Peripheral nodes	k__Bacteria	p__Tenericutes	c__Mollicutes	o__RF39	f__	g__	s__
Otu26337	1	0	1.69492	0	M25	NA	k__Bacteria	p__Proteobacteria	c__Epsilonproteobacteria	o__Campylobacterales	f__Campylobacteraceae	g__Campylobacter	s__
Otu20944	5	0	0.00194712	1.57e-08	M1	Peripheral nodes	k__Bacteria	p__Firmicutes	c__Clostridia	o__Clostridiales	f__Christensenellaceae	g__	s__
Otu15923	34	25	0.00139172	0.681042	M2	Peripheral nodes	k__Bacteria	p__Bacteroidetes	c__Bacteroidia	o__Bacteroidales	f__Paraprevotellaceae	g__CF231	s__
Otu15480	14	0	0.00139574	0.307594	M2	Peripheral nodes	k__Bacteria	p__Bacteroidetes	c__Bacteroidia	o__Bacteroidales	f__Bacteroidaceae	g__Bacteroides	s__Bacteroides_acidifaciens
Otu7027	11	73	0.00218971	5.16e-08	M1	Peripheral nodes	k__Bacteria	p__Firmicutes	c__Clostridia	o__Clostridiales	f__Ruminococcaceae	g__	s__
Otu5877	4	2	0.378215	3.48e-17	M5	Peripheral nodes	k__Bacteria	p__Spirochaetes	c__Spirochaetes	o__Sphaerochaetales	f__Sphaerochaetaceae	g__Sphaerochaeta	s__
Otu6995	44	8739	0.00261791	1.15e-06	M1	Module hubs	k__Bacteria	p__Firmicutes	c__Clostridia	o__Clostridiales	f__Ruminococcaceae	g__	s__
Otu6994	9	26	0.00209914	1.67e-08	M1	Peripheral nodes	k__Bacteria	p__Firmicutes	c__Clostridia	o__Clostridiales	f__Ruminococcaceae	g__	s__
Otu6990	5	32	0.00209809	5.65e-08	M1	Peripheral nodes	k__Bacteria	p__Firmicutes	c__Clostridia	o__Clostridiales	f__Ruminococcaceae	g__	s__
Otu6993	6	1064	0.0019235	1.89e-08	M3	Peripheral nodes	k__Bacteria	p__Firmicutes	c__Clostridia	o__Clostridiales	f__Ruminococcaceae	g__	s__
Otu186	1	0	1.52858	1.09e-17	M30	NA	k__Bacteria	p__Proteobacteria	c__Betaproteobacteria	o__Burkholderiales	f__Alcaligenaceae	g__Sutterella	s__
Otu9271	2	0	0.00177453	2.62e-08	M4	Peripheral nodes	k__Bacteria	p__Bacteroidetes	c__Bacteroidia	o__Bacteroidales	f__Prevotellaceae	g__Prevotella	s__
Otu20720	30	16	0.00139211	0.612546	M2	Peripheral nodes	k__Bacteria	p__Actinobacteria	c__Actinobacteria	o__Actinomycetales	f__Nocardiaceae	g__Rhodococcus	s__
Otu20723	29	0	0.00139393	0.602212	M2	Peripheral nodes	k__Bacteria	p__Actinobacteria	c__Actinobacteria	o__Actinomycetales	f__Gordoniaceae	g__Gordonia	s__
Otu7880	1	0	0.00185894	1.71e-07	M4	Peripheral nodes	k__Bacteria	p__Bacteroidetes	c__Bacteroidia	o__Bacteroidales	f__Prevotellaceae	g__Prevotella	s__
Otu26294	38	13	0.0013879	0.746326	M2	Peripheral nodes	k__Bacteria	p__SR1	c__	o__	f__	g__	s__
Otu19724	1	0	0.00202846	2.54e-08	M1	Peripheral nodes	k__Bacteria	p__Firmicutes	c__Clostridia	o__Clostridiales	f__Lachnospiraceae	g__	s__
Otu27503	9	114	0.00195239	6.91e-09	M1	Peripheral nodes	k__Bacteria	p__Firmicutes	c__Clostridia	o__Clostridiales	f__Lachnospiraceae	g__Roseburia	s__
Otu24	1	0	0.540103	8.71e-18	M14	Peripheral nodes	k__Bacteria	p__Firmicutes	c__Bacilli	o__Lactobacillales	f__Lactobacillaceae	g__Lactobacillus	s__
Otu1577	1	0	0.281825	6.53e-18	M6	Peripheral nodes	k__Bacteria	p__Fibrobacteres	c__Fibrobacteria	o__Fibrobacterales	f__Fibrobacteraceae	g__Fibrobacter	s__Fibrobacter_succinogenes
Otu29998	1	0	0.354233	6.53e-18	M7	Peripheral nodes	k__Bacteria	p__Firmicutes	c__Clostridia	o__Clostridiales	f__	g__	s__
Otu7115	10	16	0.00205206	9.46e-08	M1	Peripheral nodes	k__Bacteria	p__Firmicutes	c__Clostridia	o__Clostridiales	f__	g__	s__
Otu754	1	0	0.583908	6.53e-18	M12	Peripheral nodes	k__Bacteria	p__Bacteroidetes	c__Bacteroidia	o__Bacteroidales	f__Porphyromonadaceae	g__Parabacteroides	s__
Otu9536	1	0	1.8406	4.36e-18	M21	NA	k__Bacteria	p__Cyanobacteria	c__4C0d-2	o__YS2	f__	g__	s__
Otu15724	15	116	0.0015634	0.134392	M2	Peripheral nodes	k__Bacteria	p__Firmicutes	c__Clostridia	o__Clostridiales	f__Lachnospiraceae	g__Coprococcus	s__Coprococcus_eutactus
Otu6942	5	451	0.00172123	4.32e-10	M3	Peripheral nodes	k__Bacteria	p__Firmicutes	c__Clostridia	o__Clostridiales	f__Ruminococcaceae	g__	s__
Otu9802	5	588	0.00204123	5.21e-07	M4	Peripheral nodes	k__Bacteria	p__Bacteroidetes	c__Bacteroidia	o__Bacteroidales	f__Prevotellaceae	g__Prevotella	s__
Otu747	1	0	0.00174905	2.74e-08	M4	Peripheral nodes	k__Bacteria	p__Bacteroidetes	c__Bacteroidia	o__Bacteroidales	f__Prevotellaceae	g__Prevotella	s__
Otu7401	6	89	0.0020132	8.3e-08	M1	Peripheral nodes	k__Bacteria	p__Firmicutes	c__Clostridia	o__Clostridiales	f__Ruminococcaceae	g__	s__
Otu8859	36	4	0.00138539	0.730238	M2	Peripheral nodes	k__Bacteria	p__Bacteroidetes	c__Bacteroidia	o__Bacteroidales	f__S24-7	g__	s__
Otu8918	34	14	0.00138797	0.68943	M2	Peripheral nodes	k__Bacteria	p__Bacteroidetes	c__Bacteroidia	o__Bacteroidales	f__S24-7	g__	s__
Otu7019	21	467	0.0021592	7.78e-08	M1	Peripheral nodes	k__Bacteria	p__Firmicutes	c__Clostridia	o__Clostridiales	f__Christensenellaceae	g__	s__
Otu7012	4	0	0.00194264	1.54e-08	M1	Peripheral nodes	k__Bacteria	p__Firmicutes	c__Clostridia	o__Clostridiales	f__Christensenellaceae	g__	s__
Otu7010	22	3590	0.00234844	3.78e-08	M1	Peripheral nodes	k__Bacteria	p__Firmicutes	c__Clostridia	o__Clostridiales	f__Ruminococcaceae	g__	s__
Otu7017	30	678	0.00226172	9.21e-08	M1	Module hubs	k__Bacteria	p__Firmicutes	c__Clostridia	o__Clostridiales	f__Christensenellaceae	g__	s__
Otu2145	1	0	1.68805	1.09e-17	M26	NA	k__Bacteria	p__Spirochaetes	c__Spirochaetes	o__Spirochaetales	f__Spirochaetaceae	g__Treponema	s__
Otu8755	1	0	1.8406	1.09e-17	M21	NA	k__Bacteria	p__Cyanobacteria	c__4C0d-2	o__YS2	f__	g__	s__
Otu21346	4	0	0.00215553	3.26e-08	M1	Peripheral nodes	k__Bacteria	p__Firmicutes	c__Clostridia	o__Clostridiales	f__Ruminococcaceae	g__Oscillospira	s__
Otu810	1	0	0.00119833	3.09e-14	M3	Peripheral nodes	k__Bacteria	p__Bacteroidetes	c__Bacteroidia	o__Bacteroidales	f__Bacteroidaceae	g__Bacteroides	s__
Otu818	1	0	0.00107189	3.58e-15	M3	Peripheral nodes	k__Bacteria	p__Bacteroidetes	c__Bacteroidia	o__Bacteroidales	f__Bacteroidaceae	g__Bacteroides	s__
