# Supplementary material for: Topological and spatial heterogeneity of gut microbiota co-abundance networks in pigs revealed by using large-scale samples
Source: Front Microbiol. 2025 Jun 25;16:1578236. doi: 10.3389/fmicb.2025.1578236 (PMC12237903; doi:10.3389/fmicb.2025.1578236)
Supplement: Supplementary file 7 [file Table_3.xlsx]

## Sheet: ileum
Supplementary Table S2. The microbial co-abundance network modules of the ileum in F7 population
name	degree	betweenness_centrality	closeness_centrality	eigenvector_centrality	module	z	p	taxa_roles	Kingdom	Phylum	Class	Order	Family	Genus	Species
Otu17279	13	34	0.0594665	0.793171	M1	0.534267	0	Peripheral nodes	k__Bacteria	p__Firmicutes	c__Clostridia	o__Clostridiales	f__Clostridiaceae	g__SMB53	s__
Otu19716	13	0	0.0540097	0.902802	M1	0.534267	0	Peripheral nodes	k__Bacteria	p__Firmicutes	c__Clostridia	o__Clostridiales	f__	g__	s__
Otu5009	1	0	0.0729336	3.46e-17	M3	-1.08333	0	Peripheral nodes	k__Bacteria	p__Proteobacteria	c__Gammaproteobacteria	o__Pasteurellales	f__Pasteurellaceae	g__	s__
Otu31300	14	0	0.0521197	1	M1	0.718497	0	Peripheral nodes	k__Bacteria	p__Firmicutes	c__Clostridia	o__Clostridiales	f__Clostridiaceae	g__SMB53	s__
Otu31530	14	1	0.0551706	0.938985	M1	0.718497	0	Peripheral nodes	k__Bacteria	p__Firmicutes	c__Clostridia	o__Clostridiales	f__	g__	s__
Otu19860	14	0	0.0524428	0.992078	M1	0.718497	0	Peripheral nodes	k__Bacteria	p__Firmicutes	c__Clostridia	o__Clostridiales	f__	g__	s__
Otu31382	13	0	0.0541779	0.902066	M1	0.534267	0	Peripheral nodes	k__Bacteria	p__Firmicutes	c__Clostridia	o__Clostridiales	f__Clostridiaceae	g__SMB53	s__
Otu4417	3	10	0.124321	1.62e-16	M3	0.416667	0	Peripheral nodes	k__Bacteria	p__Proteobacteria	c__Gammaproteobacteria	o__Pasteurellales	f__Pasteurellaceae	g__	s__
Otu31274	1	0	0.0257615	0.00362758	M1	-1.67649	0	Peripheral nodes	k__Bacteria	p__Firmicutes	c__Clostridia	o__Clostridiales	f__Peptostreptococcaceae	g__	s__
Otu433	5	19	0.144812	2.77e-16	M3	1.91667	0	Peripheral nodes	k__Bacteria	p__Proteobacteria	c__Gammaproteobacteria	o__Pasteurellales	f__Pasteurellaceae	g__Actinobacillus	s__
Otu3110	3	7	0.106208	1.39e-16	M3	0.416667	0	Peripheral nodes	k__Bacteria	p__Proteobacteria	c__Gammaproteobacteria	o__Pasteurellales	f__Pasteurellaceae	g__Actinobacillus	s__
Otu3503	3	7	0.100024	1.62e-16	M3	0.416667	0	Peripheral nodes	k__Bacteria	p__Proteobacteria	c__Gammaproteobacteria	o__Pasteurellales	f__Pasteurellaceae	g__Haemophilus	s__Haemophilus_parasuis
Otu31613	12	0	0.0593511	0.639202	M1	0.350037	0	Peripheral nodes	k__Bacteria	p__Firmicutes	c__Clostridia	o__Clostridiales	f__Peptostreptococcaceae	g__	s__
Otu15730	6	6	0.0855044	1.85e-16	M2	0.474342	0	Peripheral nodes	k__Bacteria	p__Firmicutes	c__Clostridia	o__Clostridiales	f__Lachnospiraceae	g__	s__
Otu1107	1	0	1.9685	5.19e-17	M6	NA	NA	NA	k__Bacteria	p__Bacteroidetes	c__Bacteroidia	o__Bacteroidales	f__	g__	s__
Otu31452	15	25	0.0589011	0.921022	M1	0.902727	0	Peripheral nodes	k__Bacteria	p__Firmicutes	c__Clostridia	o__Clostridiales	f__Clostridiaceae	g__SMB53	s__
Otu2354	3	0	0.116249	1.39e-16	M3	0.416667	0	Peripheral nodes	k__Bacteria	p__Proteobacteria	c__Gammaproteobacteria	o__Pasteurellales	f__Pasteurellaceae	g__Actinobacillus	s__
Otu11643	8	10	0.0888013	1.85e-16	M2	1.42302	0	Peripheral nodes	k__Bacteria	p__Firmicutes	c__Clostridia	o__Clostridiales	f__Clostridiaceae	g__Clostridium	s__Clostridium_butyricum
Otu598	1	0	0.0303348	0.00490753	M1	-1.67649	0	Peripheral nodes	k__Bacteria	p__Bacteroidetes	c__Bacteroidia	o__Bacteroidales	f__Bacteroidaceae	g__Bacteroides	s__Bacteroides_fragilis
Otu31314	14	30	0.0600352	0.864988	M1	0.718497	0	Peripheral nodes	k__Bacteria	p__Firmicutes	c__Clostridia	o__Clostridiales	f__	g__	s__
Otu24476	1	0	0.0576808	4.04e-17	M2	-1.89737	0	Peripheral nodes	k__Bacteria	p__Firmicutes	c__Clostridia	o__Clostridiales	f__Lachnospiraceae	g__Epulopiscium	s__
Otu67	2	0	0.0540675	1.15e-16	M4	NA	NA	NA	k__Bacteria	p__Firmicutes	c__Bacilli	o__Lactobacillales	f__Lactobacillaceae	g__Lactobacillus	s__Lactobacillus_reuteri
Otu19658	2	18	0.0366889	0.0541862	M1	-1.49226	0	Peripheral nodes	k__Bacteria	p__Firmicutes	c__Clostridia	o__Clostridiales	f__Peptostreptococcaceae	g__	s__
Otu6987	3	18	0.0421927	0.0914783	M1	-1.30803	0	Peripheral nodes	k__Bacteria	p__Fusobacteria	c__Fusobacteriia	o__Fusobacteriales	f__Fusobacteriaceae	g__	s__
Otu30330	4	0	0.0710202	2.77e-16	M2	-0.474342	0	Peripheral nodes	k__Bacteria	p__Firmicutes	c__Clostridia	o__Clostridiales	f__Clostridiaceae	g__Clostridium	s__Clostridium_celatum
Otu31461	13	3	0.0564449	0.858288	M1	0.534267	0	Peripheral nodes	k__Bacteria	p__Firmicutes	c__Clostridia	o__Clostridiales	f__Peptostreptococcaceae	g__	s__
Otu19825	1	0	0.0380309	0.0496884	M1	-1.67649	0	Peripheral nodes	k__Bacteria	p__Firmicutes	c__Clostridia	o__Clostridiales	f__Clostridiaceae	g__SMB53	s__
Otu15755	4	0	0.0740181	1.85e-16	M2	-0.474342	0	Peripheral nodes	k__Bacteria	p__Firmicutes	c__Clostridia	o__Clostridiales	f__Clostridiaceae	g__	s__
Otu3264	1	0	1.98138	6.35e-17	M5	NA	NA	NA	k__Bacteria	p__Firmicutes	c__Bacilli	o__Lactobacillales	f__Streptococcaceae	g__Streptococcus	s__
Otu31572	13	0	0.0543517	0.89802	M1	0.534267	0	Peripheral nodes	k__Bacteria	p__Firmicutes	c__Clostridia	o__Clostridiales	f__	g__	s__
Otu1393	1	0	1.9685	6.35e-17	M6	NA	NA	NA	k__Bacteria	p__Bacteroidetes	c__Bacteroidia	o__Bacteroidales	f__	g__	s__
Otu7003	2	0	0.101185	6.93e-17	M3	-0.333333	0	Peripheral nodes	k__Bacteria	p__Fusobacteria	c__Fusobacteriia	o__Fusobacteriales	f__Fusobacteriaceae	g__Fusobacterium	s__
Otu3103	1	0	0.0768598	4.62e-17	M3	-1.08333	0	Peripheral nodes	k__Bacteria	p__Proteobacteria	c__Gammaproteobacteria	o__Pasteurellales	f__Pasteurellaceae	g__Actinobacillus	s__
Otu168	1	0	1.98138	4.04e-17	M5	NA	NA	NA	k__Bacteria	p__Firmicutes	c__Bacilli	o__Lactobacillales	f__Streptococcaceae	g__Streptococcus	s__
Otu15707	6	0	0.0836806	2.77e-16	M2	0.474342	0	Peripheral nodes	k__Bacteria	p__Firmicutes	c__Clostridia	o__Clostridiales	f__Clostridiaceae	g__	s__
Otu31401	14	5	0.0553263	0.939115	M1	0.718497	0	Peripheral nodes	k__Bacteria	p__Firmicutes	c__Clostridia	o__Clostridiales	f__	g__	s__
Otu42	3	20	0.0797162	1.15e-16	M4	NA	NA	NA	k__Bacteria	p__Firmicutes	c__Bacilli	o__Lactobacillales	f__Lactobacillaceae	g__Lactobacillus	s__
Otu28833	4	0	0.0714955	1.85e-16	M2	-0.474342	0	Peripheral nodes	k__Bacteria	p__Firmicutes	c__Clostridia	o__Clostridiales	f__Clostridiaceae	g__Clostridium	s__Clostridium_celatum
Otu31346	13	0	0.0573842	0.819371	M1	0.534267	0	Peripheral nodes	k__Bacteria	p__Firmicutes	c__Clostridia	o__Clostridiales	f__Clostridiaceae	g__SMB53	s__
Otu99	1	0	0.09364	3.46e-17	M3	-1.08333	0	Peripheral nodes	k__Bacteria	p__Proteobacteria	c__Gammaproteobacteria	o__Enterobacteriales	f__Enterobacteriaceae	g__Escherichia	s__Escherichia_coli
Otu90	9	27	0.110779	3.69e-16	M2	1.42302	0.197531	Peripheral nodes	k__Bacteria	p__Firmicutes	c__Bacilli	o__Turicibacterales	f__Turicibacteraceae	g__Turicibacter	s__
Otu7852	5	11	0.0853628	2.31e-16	M2	0	0	Peripheral nodes	k__Bacteria	p__Firmicutes	c__Clostridia	o__Clostridiales	f__Lachnospiraceae	g__Epulopiscium	s__
Otu24	2	0	0.0559613	8.08e-17	M4	NA	NA	NA	k__Bacteria	p__Firmicutes	c__Bacilli	o__Lactobacillales	f__Lactobacillaceae	g__Lactobacillus	s__
Otu31624	5	0	0.0435944	0.2603	M1	-0.939573	0	Peripheral nodes	k__Bacteria	p__Firmicutes	c__Clostridia	o__Clostridiales	f__Clostridiaceae	g__	s__
Otu29998	14	2	0.0595171	0.874472	M1	0.718497	0	Peripheral nodes	k__Bacteria	p__Firmicutes	c__Clostridia	o__Clostridiales	f__	g__	s__
Otu16242	4	0	0.0767925	1.85e-16	M2	-0.474342	0	Peripheral nodes	k__Bacteria	p__Firmicutes	c__Clostridia	o__Clostridiales	f__Clostridiaceae	g__	s__

## Sheet: cecum
Supplementary Table S2. The microbial co-abundance network modules of the cecum in F7 population
name	degree	betweenness_centrality	closeness_centrality	eigenvector_centrality	module	z	p	taxa_roles	Kingdom	Phylum	Class	Order	Family	Genus	Species
Otu1017	7	659	0.00122197	0.00186334	M9	1.33045	0	Peripheral nodes	k__Bacteria	p__Bacteroidetes	c__Bacteroidia	o__Bacteroidales	f__Porphyromonadaceae	g__Parabacteroides	s__
Otu17279	10	236	0.000983808	7.97e-07	M7	2.01606	0	Peripheral nodes	k__Bacteria	p__Firmicutes	c__Clostridia	o__Clostridiales	f__Clostridiaceae	g__SMB53	s__
Otu12879	1	0	0.00143913	0.0403317	M1	-1.04973	0	Peripheral nodes	k__Bacteria	p__Bacteroidetes	c__Bacteroidia	o__Bacteroidales	f__Bacteroidaceae	g__Bacteroides	s__
Otu10136	6	0	0.00164795	0.180123	M1	-0.527828	0.277778	Peripheral nodes	k__Bacteria	p__Bacteroidetes	c__Bacteroidia	o__Bacteroidales	f__Porphyromonadaceae	g__Parabacteroides	s__
Otu26283	2	0	0.940203	0	M21	NA	NA	NA	k__Bacteria	p__Cyanobacteria	c__4C0d-2	o__YS2	f__	g__	s__
Otu1261	6	114	0.00135443	6.3e-05	M2	0.648153	0	Peripheral nodes	k__Bacteria	p__Bacteroidetes	c__Bacteroidia	o__Bacteroidales	f__	g__	s__
Otu8411	1	0	0.241371	0	M17	-0.816497	0	Peripheral nodes	k__Bacteria	p__Bacteroidetes	c__Bacteroidia	o__Bacteroidales	f__Paraprevotellaceae	g__Prevotella	s__
Otu12336	2	0	0.00135639	0.0143289	M1	-0.919252	0	Peripheral nodes	k__Bacteria	p__Verrucomicrobia	c__Opitutae	o__Cerasicoccales	f__Cerasicoccaceae	g__	s__
Otu10406	4	0	0.00162804	0.122667	M1	-0.658303	0	Peripheral nodes	k__Bacteria	p__Bacteroidetes	c__Bacteroidia	o__Bacteroidales	f__Bacteroidaceae	g__Bacteroides	s__
Otu1546	1	0	1.86081	0	M30	NA	NA	NA	k__Bacteria	p__Bacteroidetes	c__Bacteroidia	o__Bacteroidales	f__	g__	s__
Otu1542	4	0	0.00135392	2.65e-05	M2	0.0827429	0	Peripheral nodes	k__Bacteria	p__Bacteroidetes	c__Bacteroidia	o__Bacteroidales	f__	g__	s__
Otu719	9	558	0.00146132	0.00252218	M6	1.56808	0	Peripheral nodes	k__Bacteria	p__Bacteroidetes	c__Bacteroidia	o__Bacteroidales	f__Prevotellaceae	g__Prevotella	s__Prevotella_stercorea
Otu581	4	5	0.412133	0	M17	1.63299	0	Peripheral nodes	k__Bacteria	p__Bacteroidetes	c__Bacteroidia	o__Bacteroidales	f__Paraprevotellaceae	g__Prevotella	s__
Otu633	2	224	0.000869233	3.16e-08	M4	-0.353148	0	Peripheral nodes	k__Bacteria	p__Bacteroidetes	c__Bacteroidia	o__Bacteroidales	f__Paraprevotellaceae	g__	s__
Otu632	3	0	0.00164934	0.0132067	M6	-0.348463	0	Peripheral nodes	k__Bacteria	p__Bacteroidetes	c__Bacteroidia	o__Bacteroidales	f__Prevotellaceae	g__Prevotella	s__Prevotella_copri
Otu631	4	2773	0.00134338	1.93e-05	M2	0.0827429	0	Peripheral nodes	k__Bacteria	p__Bacteroidetes	c__Bacteroidia	o__Bacteroidales	f__RF16	g__	s__
Otu636	23	2816	0.00187953	0.697727	M1	1.55976	0.15879	Peripheral nodes	k__Bacteria	p__Bacteroidetes	c__Bacteroidia	o__Bacteroidales	f__Bacteroidaceae	g__Bacteroides	s__
Otu635	5	224	0.00137119	0.000924837	M4	1.02413	0	Peripheral nodes	k__Bacteria	p__Bacteroidetes	c__Bacteroidia	o__Bacteroidales	f__Prevotellaceae	g__Prevotella	s__
Otu639	3	224	0.00106694	0.000221031	M9	-0.206959	0	Peripheral nodes	k__Bacteria	p__Bacteroidetes	c__Bacteroidia	o__Bacteroidales	f__Porphyromonadaceae	g__Parabacteroides	s__
Otu12103	5	0	0.00163151	0.25868	M1	-0.527828	0	Peripheral nodes	k__Bacteria	p__Bacteroidetes	c__Bacteroidia	o__Bacteroidales	f__Bacteroidaceae	g__Bacteroides	s__
Otu15713	4	14	0.187568	0	M12	1.67332	0	Peripheral nodes	k__Bacteria	p__Firmicutes	c__Clostridia	o__Clostridiales	f__Lachnospiraceae	g__	s__
Otu15717	3	6	0.159246	0	M12	0.83666	0	Peripheral nodes	k__Bacteria	p__Firmicutes	c__Clostridia	o__Clostridiales	f__Lachnospiraceae	g__	s__
Otu31300	8	18	0.00097733	7.98e-07	M7	1.34404	0	Peripheral nodes	k__Bacteria	p__Firmicutes	c__Clostridia	o__Clostridiales	f__Clostridiaceae	g__SMB53	s__
Otu775	20	12778	0.00207002	0.825225	M1	1.03786	0.27	Peripheral nodes	k__Bacteria	p__Bacteroidetes	c__Bacteroidia	o__Bacteroidales	f__Bacteroidaceae	g__Bacteroides	s__
Otu71	2	0	0.16909	0	M14	-0.944911	0	Peripheral nodes	k__Bacteria	p__Spirochaetes	c__Spirochaetes	o__Spirochaetales	f__Spirochaetaceae	g__Treponema	s__
Otu78	4	224	0.000957744	1e-08	M10	1.05615	0	Peripheral nodes	k__Bacteria	p__Spirochaetes	c__Spirochaetes	o__Spirochaetales	f__Spirochaetaceae	g__Treponema	s__
Otu7788	1	0	0.000936322	1.43e-05	M9	-0.975665	0	Peripheral nodes	k__Bacteria	p__Bacteroidetes	c__Bacteroidia	o__Bacteroidales	f__Porphyromonadaceae	g__Parabacteroides	s__
Otu7784	3	0	0.00143207	0.0012123	M3	-0.288319	0.444444	Peripheral nodes	k__Bacteria	p__Bacteroidetes	c__Bacteroidia	o__Bacteroidales	f__Paraprevotellaceae	g__	s__
Otu206	7	446	0.00163189	0.219999	M1	-0.266879	0	Peripheral nodes	k__Bacteria	p__Verrucomicrobia	c__Verruco-5	o__WCHB1-41	f__	g__	s__
Otu10228	1	0	0.00139716	0.0111211	M1	-1.04973	0	Peripheral nodes	k__Bacteria	p__Bacteroidetes	c__Bacteroidia	o__Bacteroidales	f__Bacteroidaceae	g__Bacteroides	s__
Otu31530	3	0	0.0010191	5.17e-07	M7	-0.336011	0	Peripheral nodes	k__Bacteria	p__Firmicutes	c__Clostridia	o__Clostridiales	f__	g__	s__
Otu5958	7	0	0.07706	2.5e-17	M8	0.475321	0	Peripheral nodes	k__Bacteria	p__Spirochaetes	c__Spirochaetes	o__Sphaerochaetales	f__Sphaerochaetaceae	g__Sphaerochaeta	s__
Otu504	2	0	0.00098622	4.53e-07	M4	-0.353148	0	Peripheral nodes	k__Bacteria	p__Firmicutes	c__Clostridia	o__	f__	g__	s__
Otu506	8	0	0.0790576	4.34e-17	M8	0.808045	0	Peripheral nodes	k__Bacteria	p__Spirochaetes	c__Spirochaetes	o__Sphaerochaetales	f__Sphaerochaetaceae	g__Sphaerochaeta	s__
Otu19860	11	2975	0.00119123	5.66e-06	M7	2.01606	0.165289	Peripheral nodes	k__Bacteria	p__Firmicutes	c__Clostridia	o__Clostridiales	f__	g__	s__
Otu9678	1	0	0.316967	0	M18	-0.866025	0	Peripheral nodes	k__Bacteria	p__Bacteroidetes	c__Bacteroidia	o__Bacteroidales	f__Porphyromonadaceae	g__	s__
Otu8984	13	14	0.00171673	0.637345	M1	0.515967	0	Peripheral nodes	k__Bacteria	p__Bacteroidetes	c__Bacteroidia	o__Bacteroidales	f__Bacteroidaceae	g__Bacteroides	s__
Otu15791	2	0	0.186972	1.69e-18	M13	-0.16764	0	Peripheral nodes	k__Bacteria	p__Bacteroidetes	c__Bacteroidia	o__Bacteroidales	f__	g__	s__
Otu31382	2	0	0.00104514	3.78e-07	M7	-0.672022	0	Peripheral nodes	k__Bacteria	p__Firmicutes	c__Clostridia	o__Clostridiales	f__Clostridiaceae	g__SMB53	s__
Otu7754	1	0	0.584761	0	M19	-0.57735	0	Peripheral nodes	k__Bacteria	p__Firmicutes	c__Clostridia	o__Clostridiales	f__Ruminococcaceae	g__Oscillospira	s__
Otu8701	11	222	0.00168031	0.0562464	M5	0.952572	0.165289	Peripheral nodes	k__Bacteria	p__Bacteroidetes	c__Bacteroidia	o__Bacteroidales	f__Bacteroidaceae	g__Bacteroides	s__
Otu1162	4	668	0.000980976	4.83e-07	M4	0.565036	0	Peripheral nodes	k__Bacteria	p__Bacteroidetes	c__Bacteroidia	o__Bacteroidales	f__Paraprevotellaceae	g__CF231	s__
Otu9157	1	0	0.00102029	3.35e-07	M2	-0.765372	0	Peripheral nodes	k__Bacteria	p__Bacteroidetes	c__Bacteroidia	o__Bacteroidales	f__	g__	s__
Otu15695	1	0	0.0947706	0	M12	-0.83666	0	Peripheral nodes	k__Bacteria	p__Firmicutes	c__Clostridia	o__Clostridiales	f__Lachnospiraceae	g__	s__
Otu128	1	0	1.81653	0	M31	NA	NA	NA	k__Bacteria	p__Firmicutes	c__Erysipelotrichi	o__Erysipelotrichales	f__Erysipelotrichaceae	g__RFN20	s__
Otu9217	4	0	0.00146342	0.0011117	M6	-0.0290386	0	Peripheral nodes	k__Bacteria	p__Bacteroidetes	c__Bacteroidia	o__Bacteroidales	f__Prevotellaceae	g__Prevotella	s__Prevotella_stercorea
Otu10140	4	0	0.00136585	0.0015825	M6	-0.0290386	0	Peripheral nodes	k__Bacteria	p__Bacteroidetes	c__Bacteroidia	o__Bacteroidales	f__Prevotellaceae	g__Prevotella	s__Prevotella_copri
Otu7540	2	0	0.258659	0	M16	0	0	Peripheral nodes	k__Bacteria	p__Firmicutes	c__Clostridia	o__Clostridiales	f__Ruminococcaceae	g__	s__
Otu8257	1	0	0.105239	0	M12	-0.83666	0	Peripheral nodes	k__Bacteria	p__Firmicutes	c__Clostridia	o__Clostridiales	f__Lachnospiraceae	g__	s__
Otu1253	2	224	0.00116356	1.11e-06	M2	-0.482667	0	Peripheral nodes	k__Bacteria	p__Bacteroidetes	c__Bacteroidia	o__Bacteroidales	f__	g__	s__
Otu1251	2	224	0.00116995	5.4e-06	M2	-0.482667	0	Peripheral nodes	k__Bacteria	p__Bacteroidetes	c__Bacteroidia	o__Bacteroidales	f__	g__	s__
Otu21585	1	0	0.00085242	5.59e-10	M10	-0.686496	0	Peripheral nodes	k__Bacteria	p__Firmicutes	c__Clostridia	o__Clostridiales	f__Lachnospiraceae	g__	s__
Otu86	5	2	0.247298	0	M14	1.0394	0	Peripheral nodes	k__Bacteria	p__Spirochaetes	c__Spirochaetes	o__Spirochaetales	f__Spirochaetaceae	g__Treponema	s__
Otu85	3	0	0.177636	7.24e-18	M14	-0.283473	0	Peripheral nodes	k__Bacteria	p__Spirochaetes	c__Spirochaetes	o__Spirochaetales	f__Spirochaetaceae	g__Treponema	s__
Otu15613	1	0	0.00121468	6.02e-05	M4	-0.812239	0	Peripheral nodes	k__Bacteria	p__Bacteroidetes	c__Bacteroidia	o__Bacteroidales	f__Prevotellaceae	g__Prevotella	s__
Otu433	2	1	0.90212	4.1e-18	M23	1.1547	0	Peripheral nodes	k__Bacteria	p__Proteobacteria	c__Gammaproteobacteria	o__Pasteurellales	f__Pasteurellaceae	g__Actinobacillus	s__
Otu3747	2	0	0.00102336	3.61e-07	M2	-0.482667	0	Peripheral nodes	k__Bacteria	p__Proteobacteria	c__Betaproteobacteria	o__Burkholderiales	f__Alcaligenaceae	g__Sutterella	s__
Otu603	4	447	0.000957783	9.54e-09	M10	1.05615	0	Peripheral nodes	k__Bacteria	p__Bacteroidetes	c__Bacteroidia	o__Bacteroidales	f__BS11	g__	s__
Otu600	4	2567	0.00120404	2.76e-06	M2	-0.199962	0.375	Peripheral nodes	k__Bacteria	p__Bacteroidetes	c__Bacteroidia	o__Bacteroidales	f__	g__	s__
Otu607	6	13	0.31251	0	M13	2.17932	0	Peripheral nodes	k__Bacteria	p__Bacteroidetes	c__Bacteroidia	o__Bacteroidales	f__	g__	s__
Otu605	1	0	0.00104539	1.72e-07	M2	-0.765372	0	Peripheral nodes	k__Bacteria	p__Bacteroidetes	c__Bacteroidia	o__Bacteroidales	f__	g__	s__
Otu11913	8	2959	0.00166098	0.197877	M1	-0.266879	0.21875	Peripheral nodes	k__Bacteria	p__Bacteroidetes	c__Bacteroidia	o__Bacteroidales	f__Bacteroidaceae	g__Bacteroides	s__
Otu15877	1	0	0.00114999	2.59e-06	M2	-0.765372	0	Peripheral nodes	k__Bacteria	p__Bacteroidetes	c__Bacteroidia	o__Bacteroidales	f__	g__	s__
Otu680	6	12	0.29994	0	M15	1.89146	0	Peripheral nodes	k__Bacteria	p__Bacteroidetes	c__Bacteroidia	o__Bacteroidales	f__Paraprevotellaceae	g__Prevotella	s__
Otu688	1	0	0.305222	0	M18	-0.866025	0	Peripheral nodes	k__Bacteria	p__Bacteroidetes	c__Bacteroidia	o__Bacteroidales	f__	g__	s__
Otu674	1	0	0.000877875	2.82e-08	M4	-0.812239	0	Peripheral nodes	k__Bacteria	p__Bacteroidetes	c__Bacteroidia	o__Bacteroidales	f__Prevotellaceae	g__Prevotella	s__
Otu8671	13	883	0.00165716	0.340095	M1	0.515967	0	Peripheral nodes	k__Bacteria	p__Bacteroidetes	c__Bacteroidia	o__Bacteroidales	f__Bacteroidaceae	g__Bacteroides	s__
Otu682	6	1967	0.0011065	7.66e-06	M4	1.48322	0	Peripheral nodes	k__Bacteria	p__Bacteroidetes	c__Bacteroidia	o__Bacteroidales	f__Prevotellaceae	g__Prevotella	s__
Otu683	2	0	0.00138047	0.0130049	M1	-0.919252	0	Peripheral nodes	k__Bacteria	p__Verrucomicrobia	c__Opitutae	o__Cerasicoccales	f__Cerasicoccaceae	g__	s__
Otu684	8	1444	0.00143709	0.000955512	M4	1.94231	0.21875	Peripheral nodes	k__Bacteria	p__Bacteroidetes	c__Bacteroidia	o__Bacteroidales	f__Prevotellaceae	g__Prevotella	s__
Otu16384	7	666	0.00142661	0.00229632	M5	0.264603	0	Peripheral nodes	k__Bacteria	p__Bacteroidetes	c__Bacteroidia	o__Bacteroidales	f__	g__	s__
Otu15744	1	0	0.118881	5.62e-19	M12	-0.83666	0	Peripheral nodes	k__Bacteria	p__Firmicutes	c__Clostridia	o__Clostridiales	f__Lachnospiraceae	g__	s__
Otu9860	1	0	0.000758276	1.22e-10	M3	-0.691967	0	Peripheral nodes	k__Bacteria	p__Bacteroidetes	c__Bacteroidia	o__Bacteroidales	f__	g__	s__
Otu9862	3	0	0.00117264	0.00195729	M9	-0.206959	0	Peripheral nodes	k__Bacteria	p__Bacteroidetes	c__Bacteroidia	o__Bacteroidales	f__Porphyromonadaceae	g__Parabacteroides	s__
Otu11086	4	0	0.00138328	0.00149897	M6	-0.0290386	0	Peripheral nodes	k__Bacteria	p__Bacteroidetes	c__Bacteroidia	o__Bacteroidales	f__Prevotellaceae	g__Prevotella	s__Prevotella_copri
Otu9458	6	3	0.00147076	0.0072853	M5	0.0352804	0	Peripheral nodes	k__Bacteria	p__Bacteroidetes	c__Bacteroidia	o__Bacteroidales	f__Porphyromonadaceae	g__Parabacteroides	s__
Otu1139	1	0	1.73702	0	M36	NA	NA	NA	k__Bacteria	p__Bacteroidetes	c__Bacteroidia	o__Bacteroidales	f__Paraprevotellaceae	g__YRC22	s__
Otu1136	2	0	0.00143696	0.000961862	M6	-0.667887	0	Peripheral nodes	k__Bacteria	p__Bacteroidetes	c__Bacteroidia	o__Bacteroidales	f__S24-7	g__	s__
Otu1137	1	0	0.00095298	9.04e-09	M10	-0.686496	0	Peripheral nodes	k__Bacteria	p__Bacteroidetes	c__Bacteroidia	o__Bacteroidales	f__p-2534-18B5	g__	s__
Otu870	2	0	0.00161448	0.0127396	M6	-0.667887	0	Peripheral nodes	k__Bacteria	p__Bacteroidetes	c__Bacteroidia	o__Bacteroidales	f__Prevotellaceae	g__Prevotella	s__
Otu9720	2	0	0.00159897	0.00347197	M2	-0.482667	0	Peripheral nodes	k__Bacteria	p__Bacteroidetes	c__Bacteroidia	o__Bacteroidales	f__Bacteroidaceae	g__Bacteroides	s__
Otu11129	1	0	0.16714	4.6e-18	M15	-0.866921	0	Peripheral nodes	k__Bacteria	p__Bacteroidetes	c__Bacteroidia	o__Bacteroidales	f__Paraprevotellaceae	g__Prevotella	s__
Otu117	4	2	0.232299	9.3e-18	M14	0.377964	0	Peripheral nodes	k__Bacteria	p__Spirochaetes	c__Spirochaetes	o__Spirochaetales	f__Spirochaetaceae	g__Treponema	s__
Otu111	2	0	0.898634	0	M24	NA	NA	NA	k__Bacteria	p__Verrucomicrobia	c__Verruco-5	o__WCHB1-41	f__RFP12	g__	s__
Otu8875	17	55	0.00168846	0.762061	M1	1.03786	0	Peripheral nodes	k__Bacteria	p__Bacteroidetes	c__Bacteroidia	o__Bacteroidales	f__Bacteroidaceae	g__Bacteroides	s__
Otu8879	1	0	0.00113634	9.44e-06	M3	-0.691967	0	Peripheral nodes	k__Bacteria	p__Bacteroidetes	c__Bacteroidia	o__Bacteroidales	f__Paraprevotellaceae	g__Prevotella	s__
Otu15937	3	0	0.00124852	2.57e-05	M2	-0.199962	0	Peripheral nodes	k__Bacteria	p__Bacteroidetes	c__Bacteroidia	o__Bacteroidales	f__	g__	s__
Otu1419	1	0	0.0013496	0.000761013	M4	-0.812239	0	Peripheral nodes	k__Bacteria	p__Bacteroidetes	c__Bacteroidia	o__Bacteroidales	f__Paraprevotellaceae	g__CF231	s__
Otu1414	4	824	0.00137513	0.000297023	M6	-0.348463	0.375	Peripheral nodes	k__Bacteria	p__Bacteroidetes	c__Bacteroidia	o__Bacteroidales	f__Paraprevotellaceae	g__Prevotella	s__
Otu14046	1	0	0.00128949	0.000152023	M6	-0.987311	0	Peripheral nodes	k__Bacteria	p__Bacteroidetes	c__Bacteroidia	o__Bacteroidales	f__Prevotellaceae	g__Prevotella	s__
Otu21368	4	2	0.125083	7.21e-18	M11	0.3849	0	Peripheral nodes	k__Bacteria	p__Fusobacteria	c__Fusobacteriia	o__Fusobacteriales	f__Fusobacteriaceae	g__Fusobacterium	s__
Otu697	1	0	1.9073	5.49e-19	M28	NA	NA	NA	k__Bacteria	p__Bacteroidetes	c__Bacteroidia	o__Bacteroidales	f__Paraprevotellaceae	g__Prevotella	s__
Otu18366	1	0	0.00128153	1.69e-05	M2	-0.765372	0	Peripheral nodes	k__Bacteria	p__Bacteroidetes	c__Bacteroidia	o__Bacteroidales	f__	g__	s__
Otu18946	1	0	0.00128038	1.64e-05	M2	-0.765372	0	Peripheral nodes	k__Bacteria	p__Bacteroidetes	c__Bacteroidia	o__Bacteroidales	f__	g__	s__
Otu9248	10	289	0.00162121	0.015541	M5	0.952572	0	Peripheral nodes	k__Bacteria	p__Bacteroidetes	c__Bacteroidia	o__Bacteroidales	f__	g__	s__
Otu19734	1	0	0.00105039	3.15e-07	M7	-1.00803	0	Peripheral nodes	k__Bacteria	p__Firmicutes	c__Clostridia	o__Clostridiales	f__Clostridiaceae	g__SMB53	s__
Otu657	1	0	0.00106028	0.000106719	M9	-0.975665	0	Peripheral nodes	k__Bacteria	p__Bacteroidetes	c__Bacteroidia	o__Bacteroidales	f__Porphyromonadaceae	g__Parabacteroides	s__
Otu650	6	2364	0.00125805	0.000128238	M4	1.48322	0	Peripheral nodes	k__Bacteria	p__Bacteroidetes	c__Bacteroidia	o__Bacteroidales	f__Prevotellaceae	g__Prevotella	s__
Otu653	7	2182	0.00107033	1.59e-07	M10	2.21791	0.244898	Peripheral nodes	k__Bacteria	p__Bacteroidetes	c__Bacteroidia	o__Bacteroidales	f__	g__	s__
Otu10090	3	0	0.00132308	4.46e-05	M2	-0.199962	0	Peripheral nodes	k__Bacteria	p__Bacteroidetes	c__Bacteroidia	o__Bacteroidales	f__Porphyromonadaceae	g__Parabacteroides	s__
Otu15317	1	0	0.00125519	0.000140131	M6	-0.987311	0	Peripheral nodes	k__Bacteria	p__Bacteroidetes	c__Bacteroidia	o__Bacteroidales	f__Prevotellaceae	g__Prevotella	s__Prevotella_stercorea
Otu15842	10	1	0.00159817	0.0167574	M5	0.952572	0	Peripheral nodes	k__Bacteria	p__Bacteroidetes	c__Bacteroidia	o__Bacteroidales	f__	g__	s__
Otu15843	5	10494	0.00188425	0.0481403	M2	0.0827429	0.32	Peripheral nodes	k__Bacteria	p__Bacteroidetes	c__Bacteroidia	o__Bacteroidales	f__	g__	s__
Otu15845	7	0	0.0016014	0.014182	M5	0.264603	0	Peripheral nodes	k__Bacteria	p__Bacteroidetes	c__Bacteroidia	o__Bacteroidales	f__	g__	s__
Otu15848	9	2030	0.00169183	0.0557	M5	0.493926	0.197531	Peripheral nodes	k__Bacteria	p__Bacteroidetes	c__Bacteroidia	o__Bacteroidales	f__	g__	s__
Otu6037	2	0	0.0531491	5.34e-18	M8	-1.1883	0	Peripheral nodes	k__Bacteria	p__Spirochaetes	c__Spirochaetes	o__Sphaerochaetales	f__Sphaerochaetaceae	g__Sphaerochaeta	s__
Otu7811	2	0	0.00112288	1.1e-05	M3	-0.288319	0	Peripheral nodes	k__Bacteria	p__Bacteroidetes	c__Bacteroidia	o__Bacteroidales	f__	g__	s__
Otu7107	1	0	1.97239	0	M27	NA	NA	NA	k__Bacteria	p__Firmicutes	c__Clostridia	o__Clostridiales	f__Ruminococcaceae	g__	s__
Otu3901	1	0	0.529017	0	M22	-0.57735	0	Peripheral nodes	k__Bacteria	p__Firmicutes	c__Clostridia	o__Clostridiales	f__Veillonellaceae	g__Phascolarctobacterium	s__
Otu9996	1	0	0.00135333	0.00807957	M1	-1.04973	0	Peripheral nodes	k__Bacteria	p__Bacteroidetes	c__Bacteroidia	o__Bacteroidales	f__Bacteroidaceae	g__Bacteroides	s__
Otu17402	2	0	0.00141421	0.00199611	M5	-0.882011	0	Peripheral nodes	k__Bacteria	p__Bacteroidetes	c__Bacteroidia	o__Bacteroidales	f__	g__	s__
Otu9696	1	0	0.00142396	0.0426143	M1	-1.04973	0	Peripheral nodes	k__Bacteria	p__Bacteroidetes	c__Bacteroidia	o__Bacteroidales	f__Porphyromonadaceae	g__Parabacteroides	s__
Otu9526	1	0	0.00109686	7.41e-06	M4	-0.812239	0	Peripheral nodes	k__Bacteria	p__Bacteroidetes	c__Bacteroidia	o__Bacteroidales	f__Prevotellaceae	g__Prevotella	s__
Otu753	1	0	0.00138233	0.0201722	M1	-1.04973	0	Peripheral nodes	k__Bacteria	p__Bacteroidetes	c__Bacteroidia	o__Bacteroidales	f__Bacteroidaceae	g__Bacteroides	s__
Otu15785	1	0	0.107464	0	M12	-0.83666	0	Peripheral nodes	k__Bacteria	p__Firmicutes	c__Clostridia	o__Clostridiales	f__Ruminococcaceae	g__Ruminococcus	s__
Otu8301	1	0	0.00101442	5.01e-07	M3	-0.691967	0	Peripheral nodes	k__Bacteria	p__Bacteroidetes	c__Bacteroidia	o__Bacteroidales	f__Paraprevotellaceae	g__Prevotella	s__
Otu1107	18	5065	0.00134972	9.47e-05	M2	3.75791	0.104938	Module hubs	k__Bacteria	p__Bacteroidetes	c__Bacteroidia	o__Bacteroidales	f__	g__	s__
Otu16098	5	446	0.0012868	4.5e-05	M2	0.365448	0	Peripheral nodes	k__Bacteria	p__Bacteroidetes	c__Bacteroidia	o__Bacteroidales	f__	g__	s__
Otu16090	2	0	0.00122552	0.000268709	M5	-0.882011	0	Peripheral nodes	k__Bacteria	p__Bacteroidetes	c__Bacteroidia	o__Bacteroidales	f__	g__	s__
Otu16096	2	0	0.00111805	2.79e-06	M2	-0.482667	0	Peripheral nodes	k__Bacteria	p__Bacteroidetes	c__Bacteroidia	o__Bacteroidales	f__	g__	s__
Otu8846	3	515	0.00123007	2.33e-05	M3	0.115328	0	Peripheral nodes	k__Bacteria	p__Bacteroidetes	c__Bacteroidia	o__Bacteroidales	f__Paraprevotellaceae	g__Prevotella	s__
Otu24257	1	0	0.636173	0	M20	-0.57735	0	Peripheral nodes	k__Bacteria	p__Firmicutes	c__Clostridia	o__Clostridiales	f__Ruminococcaceae	g__Oscillospira	s__
Otu7185	2	224	0.00114453	9.05e-06	M3	-0.288319	0	Peripheral nodes	k__Bacteria	p__Bacteroidetes	c__Bacteroidia	o__Bacteroidales	f__Paraprevotellaceae	g__Prevotella	s__
Otu16687	1	0	1.77494	0	M33	NA	NA	NA	k__Bacteria	p__Bacteroidetes	c__Bacteroidia	o__Bacteroidales	f__Paraprevotellaceae	g__Prevotella	s__
Otu7064	2	582	0.0013459	0.000143575	M3	-0.691967	0.5	Peripheral nodes	k__Bacteria	p__Bacteroidetes	c__Bacteroidia	o__Bacteroidales	f__Prevotellaceae	g__Prevotella	s__
Otu7928	1	0	0.630676	0	M20	-0.57735	0	Peripheral nodes	k__Bacteria	p__Firmicutes	c__Clostridia	o__Clostridiales	f__Ruminococcaceae	g__Oscillospira	s__
Otu1186	1	0	0.000843789	6.65e-10	M10	-0.686496	0	Peripheral nodes	k__Bacteria	p__Bacteroidetes	c__	o__	f__	g__	s__
Otu1184	1	0	1.76523	9.26e-20	M35	NA	NA	NA	k__Bacteria	p__Bacteroidetes	c__Bacteroidia	o__Bacteroidales	f__	g__	s__
Otu9176	2	0	0.959785	1.65e-18	M21	NA	NA	NA	k__Bacteria	p__Cyanobacteria	c__4C0d-2	o__YS2	f__	g__	s__
Otu15670	3	227	0.0012362	7.26e-05	M3	-0.288319	0.444444	Peripheral nodes	k__Bacteria	p__Bacteroidetes	c__Bacteroidia	o__Bacteroidales	f__Paraprevotellaceae	g__Prevotella	s__
Otu15678	2	224	0.000943128	1e-08	M10	-0.105615	0	Peripheral nodes	k__Bacteria	p__Firmicutes	c__Clostridia	o__Clostridiales	f__Lachnospiraceae	g__	s__
Otu9486	1	0	0.000961801	5.15e-07	M4	-0.812239	0	Peripheral nodes	k__Bacteria	p__Bacteroidetes	c__Bacteroidia	o__Bacteroidales	f__Prevotellaceae	g__Prevotella	s__
Otu9039	3	1	0.0014108	0.00187215	M5	-0.652688	0	Peripheral nodes	k__Bacteria	p__Bacteroidetes	c__Bacteroidia	o__Bacteroidales	f__	g__	s__
Otu9034	20	89	0.00176095	0.814979	M1	1.42929	0	Peripheral nodes	k__Bacteria	p__Bacteroidetes	c__Bacteroidia	o__Bacteroidales	f__Bacteroidaceae	g__Bacteroides	s__
Otu9032	1	0	1.97239	0	M27	NA	NA	NA	k__Bacteria	p__Firmicutes	c__Clostridia	o__Clostridiales	f__Ruminococcaceae	g__	s__
Otu22591	2	0	0.881213	0	M25	NA	NA	NA	k__Bacteria	p__Firmicutes	c__Clostridia	o__Clostridiales	f__Ruminococcaceae	g__	s__
Otu25281	2	1	0.950119	0	M20	1.1547	0	Peripheral nodes	k__Bacteria	p__Firmicutes	c__Clostridia	o__Clostridiales	f__Ruminococcaceae	g__Oscillospira	s__
Otu31452	3	0	0.00104535	4.32e-07	M7	-0.336011	0	Peripheral nodes	k__Bacteria	p__Firmicutes	c__Clostridia	o__Clostridiales	f__Clostridiaceae	g__SMB53	s__
Otu10599	3	0	0.00128067	2.23e-05	M2	-0.199962	0	Peripheral nodes	k__Bacteria	p__Bacteroidetes	c__Bacteroidia	o__Bacteroidales	f__Bacteroidaceae	g__Bacteroides	s__
Otu10594	1	0	1.77462	1.74e-18	M34	NA	NA	NA	k__Bacteria	p__Bacteroidetes	c__Bacteroidia	o__Bacteroidales	f__Prevotellaceae	g__Prevotella	s__
Otu11642	1	0	0.250363	5.66e-18	M17	-0.816497	0	Peripheral nodes	k__Bacteria	p__Bacteroidetes	c__Bacteroidia	o__Bacteroidales	f__Paraprevotellaceae	g__Prevotella	s__
Otu884	1	0	1.77746	1.17e-18	M32	NA	NA	NA	k__Bacteria	p__Bacteroidetes	c__Bacteroidia	o__Bacteroidales	f__	g__	s__
Otu18913	11	1754	0.00151027	0.000289217	M2	2.06168	0	Peripheral nodes	k__Bacteria	p__Bacteroidetes	c__Bacteroidia	o__Bacteroidales	f__	g__	s__
Otu15895	3	0	0.00140982	0.00148359	M5	-0.652688	0	Peripheral nodes	k__Bacteria	p__Bacteroidetes	c__Bacteroidia	o__Bacteroidales	f__Paraprevotellaceae	g__	s__
Otu10410	1	0	0.00119724	0.00148621	M9	-0.975665	0	Peripheral nodes	k__Bacteria	p__Bacteroidetes	c__Bacteroidia	o__Bacteroidales	f__Porphyromonadaceae	g__Parabacteroides	s__
Otu8892	8	5374	0.00184244	0.0575076	M5	0.264603	0.21875	Peripheral nodes	k__Bacteria	p__Bacteroidetes	c__Bacteroidia	o__Bacteroidales	f__	g__	s__
Otu7841	3	44	0.00114018	2.02e-05	M3	0.115328	0	Peripheral nodes	k__Bacteria	p__Bacteroidetes	c__Bacteroidia	o__Bacteroidales	f__Paraprevotellaceae	g__Prevotella	s__
Otu7842	2	1	0.898473	1.58e-18	M19	1.1547	0	Peripheral nodes	k__Bacteria	p__Firmicutes	c__Clostridia	o__Clostridiales	f__Ruminococcaceae	g__Oscillospira	s__
Otu661	3	0	0.00107378	0.000320582	M9	-0.206959	0	Peripheral nodes	k__Bacteria	p__Bacteroidetes	c__Bacteroidia	o__Bacteroidales	f__Porphyromonadaceae	g__Parabacteroides	s__
Otu598	1	0	0.103124	3.46e-18	M11	-1.34715	0	Peripheral nodes	k__Bacteria	p__Bacteroidetes	c__Bacteroidia	o__Bacteroidales	f__Bacteroidaceae	g__Bacteroides	s__Bacteroides_fragilis
Otu599	1	0	0.000788702	1.84e-09	M4	-0.812239	0	Peripheral nodes	k__Bacteria	p__Bacteroidetes	c__Bacteroidia	o__Bacteroidales	f__	g__	s__
Otu596	1	0	0.0985853	2.85e-19	M11	-1.34715	0	Peripheral nodes	k__Bacteria	p__Bacteroidetes	c__Bacteroidia	o__Bacteroidales	f__Bacteroidaceae	g__Bacteroides	s__
Otu594	4	9	0.151048	5.95e-18	M11	0.3849	0	Peripheral nodes	k__Bacteria	p__Bacteroidetes	c__Bacteroidia	o__Bacteroidales	f__Bacteroidaceae	g__Bacteroides	s__
Otu626	5	28	0.00124598	0.000178469	M4	1.02413	0	Peripheral nodes	k__Bacteria	p__Bacteroidetes	c__Bacteroidia	o__Bacteroidales	f__Prevotellaceae	g__Prevotella	s__
Otu628	2	446	0.000929325	3.34e-08	M3	-0.288319	0	Peripheral nodes	k__Bacteria	p__Bacteroidetes	c__Bacteroidia	o__Bacteroidales	f__	g__	s__
Otu629	1	0	1.88964	0	M29	NA	NA	NA	k__Bacteria	p__Bacteroidetes	c__Bacteroidia	o__Bacteroidales	f__	g__	s__
Otu16163	2	0	0.000915953	3.98e-08	M3	-0.288319	0	Peripheral nodes	k__Bacteria	p__Bacteroidetes	c__Bacteroidia	o__Bacteroidales	f__S24-7	g__	s__
Otu31314	1	0	0.000902636	3.33e-08	M7	-1.00803	0	Peripheral nodes	k__Bacteria	p__Firmicutes	c__Clostridia	o__Clostridiales	f__	g__	s__
Otu67	2	0	0.766107	0	M26	NA	NA	NA	k__Bacteria	p__Firmicutes	c__Bacilli	o__Lactobacillales	f__Lactobacillaceae	g__Lactobacillus	s__Lactobacillus_reuteri
Otu68	2	0	0.000956165	9.42e-09	M10	-0.105615	0	Peripheral nodes	k__Bacteria	p__Spirochaetes	c__Spirochaetes	o__Spirochaetales	f__Spirochaetaceae	g__Treponema	s__
Otu15812	3	223	0.00123151	0.000138658	M5	-0.652688	0	Peripheral nodes	k__Bacteria	p__Bacteroidetes	c__Bacteroidia	o__Bacteroidales	f__	g__	s__
Otu482	8	0	0.0788215	6.86e-17	M8	0.808045	0	Peripheral nodes	k__Bacteria	p__Spirochaetes	c__Spirochaetes	o__Sphaerochaetales	f__Sphaerochaetaceae	g__Sphaerochaeta	s__
Otu483	7	22	0.0821524	1.81e-17	M8	0.475321	0	Peripheral nodes	k__Bacteria	p__Spirochaetes	c__Spirochaetes	o__Sphaerochaetales	f__Sphaerochaetaceae	g__Sphaerochaeta	s__
Otu19856	2	0	0.00105062	3.76e-07	M7	-0.672022	0	Peripheral nodes	k__Bacteria	p__Firmicutes	c__Clostridia	o__Clostridiales	f__Clostridiaceae	g__SMB53	s__
Otu16506	2	0	0.0010771	1.76e-05	M5	-0.882011	0	Peripheral nodes	k__Bacteria	p__Bacteroidetes	c__Bacteroidia	o__Bacteroidales	f__	g__	s__
Otu15769	7	1930	0.00146783	0.0023465	M5	0.0352804	0.244898	Peripheral nodes	k__Bacteria	p__Bacteroidetes	c__Bacteroidia	o__Bacteroidales	f__Paraprevotellaceae	g__	s__
Otu8711	3	0	0.210593	0	M15	0.236433	0	Peripheral nodes	k__Bacteria	p__Bacteroidetes	c__Bacteroidia	o__Bacteroidales	f__Paraprevotellaceae	g__Prevotella	s__
Otu16200	1	0	0.00130144	0.000143204	M6	-0.987311	0	Peripheral nodes	k__Bacteria	p__Bacteroidetes	c__Bacteroidia	o__Bacteroidales	f__	g__	s__
Otu17554	3	402	0.00141414	0.00119987	M5	-0.882011	0.444444	Peripheral nodes	k__Bacteria	p__Bacteroidetes	c__Bacteroidia	o__Bacteroidales	f__Paraprevotellaceae	g__	s__
Otu1159	5	2467	0.00137286	0.000152117	M3	0.115328	0.56	Peripheral nodes	k__Bacteria	p__Bacteroidetes	c__Bacteroidia	o__Bacteroidales	f__Paraprevotellaceae	g__Prevotella	s__
Otu1150	1	0	0.00105128	9.23e-06	M4	-0.812239	0	Peripheral nodes	k__Bacteria	p__Bacteroidetes	c__Bacteroidia	o__Bacteroidales	f__Paraprevotellaceae	g__YRC22	s__
Otu1151	7	3493	0.00161869	0.0124967	M4	1.48322	0.244898	Peripheral nodes	k__Bacteria	p__Bacteroidetes	c__Bacteroidia	o__Bacteroidales	f__Paraprevotellaceae	g__CF231	s__
Otu858	1	0	0.000859117	5.66e-10	M10	-0.686496	0	Peripheral nodes	k__Bacteria	p__Bacteroidetes	c__Bacteroidia	o__Bacteroidales	f__	g__	s__
Otu16042	1	0	0.000948142	9.46e-09	M10	-0.686496	0	Peripheral nodes	k__Bacteria	p__Firmicutes	c__Clostridia	o__Clostridiales	f__Lachnospiraceae	g__	s__
Otu9142	5	5	0.00143166	0.00231987	M6	0.290386	0	Peripheral nodes	k__Bacteria	p__Bacteroidetes	c__Bacteroidia	o__Bacteroidales	f__Prevotellaceae	g__Prevotella	s__Prevotella_copri
Otu15688	1	0	0.00116198	5.6e-06	M2	-0.765372	0	Peripheral nodes	k__Bacteria	p__Firmicutes	c__Clostridia	o__Clostridiales	f__Lachnospiraceae	g__Dorea	s__
Otu139	2	1	0.741235	0	M22	1.1547	0	Peripheral nodes	k__Bacteria	p__Firmicutes	c__Clostridia	o__Clostridiales	f__Veillonellaceae	g__Phascolarctobacterium	s__
Otu735	9	1671	0.00166931	0.0134441	M6	1.56808	0	Peripheral nodes	k__Bacteria	p__Bacteroidetes	c__Bacteroidia	o__Bacteroidales	f__Prevotellaceae	g__Prevotella	s__
Otu9055	1	0	0.16465	6.34e-18	M15	-0.866921	0	Peripheral nodes	k__Bacteria	p__Bacteroidetes	c__Bacteroidia	o__Bacteroidales	f__Paraprevotellaceae	g__Prevotella	s__
Otu15912	4	0	0.00146879	0.00619553	M5	-0.423365	0	Peripheral nodes	k__Bacteria	p__Bacteroidetes	c__Bacteroidia	o__Bacteroidales	f__	g__	s__
Otu11804	15	0	0.00169645	0.729489	M1	0.776916	0	Peripheral nodes	k__Bacteria	p__Bacteroidetes	c__Bacteroidia	o__Bacteroidales	f__Bacteroidaceae	g__Bacteroides	s__
Otu20950	1	0	0.0444638	1.82e-18	M8	-1.52103	0	Peripheral nodes	k__Bacteria	p__Firmicutes	c__Clostridia	o__Clostridiales	f__	g__	s__
Otu6986	2	3	0.303435	0	M16	0	0	Peripheral nodes	k__Bacteria	p__Firmicutes	c__Clostridia	o__Clostridiales	f__Ruminococcaceae	g__	s__
Otu6987	6	13	0.170616	1.06e-17	M11	1.5396	0	Peripheral nodes	k__Bacteria	p__Fusobacteria	c__Fusobacteriia	o__Fusobacteriales	f__Fusobacteriaceae	g__	s__
Otu30330	2	0	0.000796655	1.11e-08	M7	-0.672022	0	Peripheral nodes	k__Bacteria	p__Firmicutes	c__Clostridia	o__Clostridiales	f__Clostridiaceae	g__Clostridium	s__Clostridium_celatum
Otu789	1	0	0.00102206	6.53e-08	M2	-0.765372	0	Peripheral nodes	k__Bacteria	p__Bacteroidetes	c__Bacteroidia	o__Bacteroidales	f__	g__	s__
Otu783	3	224	0.000974239	5.06e-07	M4	0.105944	0	Peripheral nodes	k__Bacteria	p__Bacteroidetes	c__Bacteroidia	o__Bacteroidales	f__Prevotellaceae	g__Prevotella	s__
Otu785	4	0	0.00135627	2.62e-05	M2	0.0827429	0	Peripheral nodes	k__Bacteria	p__Bacteroidetes	c__Bacteroidia	o__Bacteroidales	f__	g__	s__
Otu16287	1	0	0.000920658	3.56e-08	M3	-0.691967	0	Peripheral nodes	k__Bacteria	p__Bacteroidetes	c__Bacteroidia	o__Bacteroidales	f__	g__	s__
Otu9261	14	2	0.00169473	0.667656	M1	0.646441	0	Peripheral nodes	k__Bacteria	p__Bacteroidetes	c__Bacteroidia	o__Bacteroidales	f__Bacteroidaceae	g__Bacteroides	s__
Otu16670	1	0	0.000873832	2.98e-08	M4	-0.812239	0	Peripheral nodes	k__Bacteria	p__Bacteroidetes	c__Bacteroidia	o__Bacteroidales	f__Paraprevotellaceae	g__CF231	s__
Otu679	1	0	1.77462	0	M34	NA	NA	NA	k__Bacteria	p__Bacteroidetes	c__Bacteroidia	o__Bacteroidales	f__Prevotellaceae	g__Prevotella	s__
Otu3568	1	0	0.00101966	3.37e-07	M2	-0.765372	0	Peripheral nodes	k__Bacteria	p__Firmicutes	c__Erysipelotrichi	o__Erysipelotrichales	f__Erysipelotrichaceae	g__	s__
Otu867	1	0	1.86081	0	M30	NA	NA	NA	k__Bacteria	p__Bacteroidetes	c__Bacteroidia	o__Bacteroidales	f__	g__	s__
Otu37	5	2	0.252111	3.57e-18	M14	1.0394	0	Peripheral nodes	k__Bacteria	p__Spirochaetes	c__Spirochaetes	o__Spirochaetales	f__Spirochaetaceae	g__Treponema	s__
Otu9195	3	0	0.00164347	0.00310562	M2	-0.199962	0	Peripheral nodes	k__Bacteria	p__Bacteroidetes	c__Bacteroidia	o__Bacteroidales	f__	g__	s__
Otu8826	3	0	0.188349	0	M15	0.236433	0	Peripheral nodes	k__Bacteria	p__Bacteroidetes	c__Bacteroidia	o__Bacteroidales	f__Paraprevotellaceae	g__Prevotella	s__
Otu1509	1	0	0.00135082	0.000756861	M4	-0.812239	0	Peripheral nodes	k__Bacteria	p__Bacteroidetes	c__Bacteroidia	o__Bacteroidales	f__	g__	s__
Otu7839	1	0	0.613911	0	M19	-0.57735	0	Peripheral nodes	k__Bacteria	p__Firmicutes	c__Clostridia	o__Clostridiales	f__Ruminococcaceae	g__Oscillospira	s__
Otu19825	3	0	0.00102565	4.93e-07	M7	-0.336011	0	Peripheral nodes	k__Bacteria	p__Firmicutes	c__Clostridia	o__Clostridiales	f__Clostridiaceae	g__SMB53	s__
Otu15752	3	0	0.00121774	0.000148522	M5	-0.652688	0	Peripheral nodes	k__Bacteria	p__Bacteroidetes	c__Bacteroidia	o__Bacteroidales	f__	g__	s__
Otu16074	1	0	0.0011716	9.41e-06	M3	-0.691967	0	Peripheral nodes	k__Bacteria	p__Bacteroidetes	c__Bacteroidia	o__Bacteroidales	f__Paraprevotellaceae	g__	s__
Otu10916	5	0	0.00162442	0.254045	M1	-0.527828	0	Peripheral nodes	k__Bacteria	p__Bacteroidetes	c__Bacteroidia	o__Bacteroidales	f__Bacteroidaceae	g__Bacteroides	s__
Otu9115	1	0	0.00124737	0.000146359	M6	-0.987311	0	Peripheral nodes	k__Bacteria	p__Bacteroidetes	c__Bacteroidia	o__Bacteroidales	f__Prevotellaceae	g__Prevotella	s__
Otu9113	13	1	0.00170177	0.617497	M1	0.515967	0	Peripheral nodes	k__Bacteria	p__Bacteroidetes	c__Bacteroidia	o__Bacteroidales	f__Bacteroidaceae	g__Bacteroides	s__
Otu5914	8	0	0.0867295	2.55e-17	M8	0.808045	0	Peripheral nodes	k__Bacteria	p__Spirochaetes	c__Spirochaetes	o__Sphaerochaetales	f__Sphaerochaetaceae	g__Sphaerochaeta	s__
Otu15942	5	220	0.00142279	0.00227444	M5	-0.194042	0	Peripheral nodes	k__Bacteria	p__Bacteroidetes	c__Bacteroidia	o__Bacteroidales	f__Paraprevotellaceae	g__	s__
Otu15945	2	0	0.00112198	2.73e-06	M2	-0.482667	0	Peripheral nodes	k__Bacteria	p__Bacteroidetes	c__Bacteroidia	o__Bacteroidales	f__	g__	s__
Otu16555	1	0	0.00134728	0.00136431	M5	-1.11133	0	Peripheral nodes	k__Bacteria	p__Bacteroidetes	c__Bacteroidia	o__Bacteroidales	f__	g__	s__
Otu9090	5	1	0.00120802	0.00183953	M9	0.561747	0	Peripheral nodes	k__Bacteria	p__Bacteroidetes	c__Bacteroidia	o__Bacteroidales	f__Porphyromonadaceae	g__Parabacteroides	s__
Otu8947	1	0	0.00149369	0.0435383	M1	-1.04973	0	Peripheral nodes	k__Bacteria	p__Bacteroidetes	c__Bacteroidia	o__Bacteroidales	f__Bacteroidaceae	g__Bacteroides	s__
Otu8941	2	0	0.95338	0	M21	NA	NA	NA	k__Bacteria	p__Cyanobacteria	c__4C0d-2	o__YS2	f__	g__	s__
Otu1393	15	3732	0.00153862	0.000301077	M2	3.1925	0	Module hubs	k__Bacteria	p__Bacteroidetes	c__Bacteroidia	o__Bacteroidales	f__	g__	s__
Otu7003	1	0	0.601612	7.07e-19	M23	-0.57735	0	Peripheral nodes	k__Bacteria	p__Fusobacteria	c__Fusobacteriia	o__Fusobacteriales	f__Fusobacteriaceae	g__Fusobacterium	s__
Otu21627	2	0	0.864753	0	M25	NA	NA	NA	k__Bacteria	p__Firmicutes	c__Clostridia	o__Clostridiales	f__Ruminococcaceae	g__	s__
Otu11344	1	0	0.00136693	0.00758936	M1	-1.04973	0	Peripheral nodes	k__Bacteria	p__Bacteroidetes	c__Bacteroidia	o__Bacteroidales	f__Bacteroidaceae	g__Bacteroides	s__
Otu21351	5	3	0.152321	1.36e-17	M11	0.96225	0	Peripheral nodes	k__Bacteria	p__Fusobacteria	c__Fusobacteriia	o__Fusobacteriales	f__Fusobacteriaceae	g__Fusobacterium	s__
Otu13160	2	0	0.0013801	0.0300626	M1	-0.919252	0	Peripheral nodes	k__Bacteria	p__Bacteroidetes	c__Bacteroidia	o__Bacteroidales	f__Bacteroidaceae	g__Bacteroides	s__
Otu9259	1	0	0.175134	0	M13	-0.754378	0	Peripheral nodes	k__Bacteria	p__Bacteroidetes	c__Bacteroidia	o__Bacteroidales	f__	g__	s__
Otu21563	1	0	0.207383	0	M16	-1.41421	0	Peripheral nodes	k__Bacteria	p__Firmicutes	c__Clostridia	o__Clostridiales	f__Ruminococcaceae	g__	s__
Otu14735	1	0	0.0012115	0.00137286	M9	-0.975665	0	Peripheral nodes	k__Bacteria	p__Bacteroidetes	c__Bacteroidia	o__Bacteroidales	f__Porphyromonadaceae	g__Parabacteroides	s__
Otu645	5	224	0.00119987	0.000158534	M4	1.02413	0	Peripheral nodes	k__Bacteria	p__Bacteroidetes	c__Bacteroidia	o__Bacteroidales	f__Prevotellaceae	g__Prevotella	s__
Otu643	10	7496	0.00192143	0.200158	M6	0.290386	0.58	Peripheral nodes	k__Bacteria	p__Bacteroidetes	c__Bacteroidia	o__Bacteroidales	f__Prevotellaceae	g__Prevotella	s__
Otu640	11	1939	0.00169027	0.0165443	M6	2.20693	0	Peripheral nodes	k__Bacteria	p__Bacteroidetes	c__Bacteroidia	o__Bacteroidales	f__Prevotellaceae	g__Prevotella	s__Prevotella_copri
Otu648	2	0	0.121662	6.4e-18	M11	-0.7698	0	Peripheral nodes	k__Bacteria	p__Bacteroidetes	c__Bacteroidia	o__Bacteroidales	f__Bacteroidaceae	g__Bacteroides	s__Bacteroides_plebeius
Otu649	1	0	0.00118266	5.32e-05	M4	-0.812239	0	Peripheral nodes	k__Bacteria	p__Bacteroidetes	c__Bacteroidia	o__Bacteroidales	f__Prevotellaceae	g__Prevotella	s__
Otu16189	7	10108	0.00169984	0.00379843	M2	0.930857	0	Peripheral nodes	k__Bacteria	p__Bacteroidetes	c__Bacteroidia	o__Bacteroidales	f__	g__	s__
Otu17787	1	0	0.00132599	0.000842525	M4	-0.812239	0	Peripheral nodes	k__Bacteria	p__Bacteroidetes	c__Bacteroidia	o__Bacteroidales	f__Paraprevotellaceae	g__CF231	s__
Otu475	1	0	1.81653	0	M31	NA	NA	NA	k__Bacteria	p__Firmicutes	c__Erysipelotrichi	o__Erysipelotrichales	f__Erysipelotrichaceae	g__	s__
Otu476	2	224	0.00116698	5.5e-06	M2	-0.482667	0	Peripheral nodes	k__Bacteria	p__Firmicutes	c__Erysipelotrichi	o__Erysipelotrichales	f__Erysipelotrichaceae	g__p-75-a5	s__
Otu478	9	30	0.0964041	5.12e-17	M8	1.14077	0	Peripheral nodes	k__Bacteria	p__Spirochaetes	c__Spirochaetes	o__Sphaerochaetales	f__Sphaerochaetaceae	g__Sphaerochaeta	s__
Otu8816	2	0	0.183288	5.52e-18	M13	-0.16764	0	Peripheral nodes	k__Bacteria	p__Bacteroidetes	c__Bacteroidia	o__Bacteroidales	f__	g__	s__
Otu8813	29	1324	0.00185047	1	M1	2.47308	0.0665874	Peripheral nodes	k__Bacteria	p__Bacteroidetes	c__Bacteroidia	o__Bacteroidales	f__Bacteroidaceae	g__Bacteroides	s__
Otu8818	4	1840	0.00144347	0.00117587	M3	0.115328	0.375	Peripheral nodes	k__Bacteria	p__Bacteroidetes	c__Bacteroidia	o__Bacteroidales	f__Paraprevotellaceae	g__Prevotella	s__
Otu15707	4	219	0.000906289	9.19e-08	M7	0	0	Peripheral nodes	k__Bacteria	p__Firmicutes	c__Clostridia	o__Clostridiales	f__Clostridiaceae	g__	s__
Otu9823	3	0	0.00114945	1.77e-05	M3	0.115328	0	Peripheral nodes	k__Bacteria	p__Bacteroidetes	c__Bacteroidia	o__Bacteroidales	f__	g__	s__
Otu8298	8	1	0.00161209	0.0146705	M5	0.493926	0	Peripheral nodes	k__Bacteria	p__Bacteroidetes	c__Bacteroidia	o__Bacteroidales	f__	g__	s__
Otu43	4	5	0.239509	1.89e-17	M14	0.377964	0	Peripheral nodes	k__Bacteria	p__Spirochaetes	c__Spirochaetes	o__Spirochaetales	f__Spirochaetaceae	g__Treponema	s__
Otu42	2	0	0.798339	0	M26	NA	NA	NA	k__Bacteria	p__Firmicutes	c__Bacilli	o__Lactobacillales	f__Lactobacillaceae	g__Lactobacillus	s__
Otu7794	3	131	0.00118823	2.8e-05	M3	0.115328	0	Peripheral nodes	k__Bacteria	p__Bacteroidetes	c__Bacteroidia	o__Bacteroidales	f__Paraprevotellaceae	g__Prevotella	s__
Otu217	2	0	0.00098222	4.64e-07	M2	-0.482667	0	Peripheral nodes	k__Bacteria	p__Proteobacteria	c__Betaproteobacteria	o__Burkholderiales	f__Alcaligenaceae	g__Sutterella	s__
Otu16715	1	0	1.77494	0	M33	NA	NA	NA	k__Bacteria	p__Bacteroidetes	c__Bacteroidia	o__Bacteroidales	f__Paraprevotellaceae	g__Prevotella	s__
Otu8871	4	271	0.00147713	0.00104291	M6	-0.0290386	0	Peripheral nodes	k__Bacteria	p__Bacteroidetes	c__Bacteroidia	o__Bacteroidales	f__Prevotellaceae	g__Prevotella	s__Prevotella_stercorea
Otu10061	13	24	0.00173756	0.607506	M1	0.515967	0	Peripheral nodes	k__Bacteria	p__Bacteroidetes	c__Bacteroidia	o__Bacteroidales	f__Bacteroidaceae	g__Bacteroides	s__
Otu8775	1	0	0.166708	5.24e-18	M15	-0.866921	0	Peripheral nodes	k__Bacteria	p__Bacteroidetes	c__Bacteroidia	o__Bacteroidales	f__	g__	s__
Otu10509	2	224	0.0008369	1.99e-09	M3	-0.288319	0	Peripheral nodes	k__Bacteria	p__Bacteroidetes	c__Bacteroidia	o__Bacteroidales	f__	g__	s__
Otu9046	1	0	0.00142989	0.0415767	M1	-1.04973	0	Peripheral nodes	k__Bacteria	p__Bacteroidetes	c__Bacteroidia	o__Bacteroidales	f__Bacteroidaceae	g__Bacteroides	s__
Otu1173	4	224	0.00132353	4.59e-05	M2	0.0827429	0	Peripheral nodes	k__Bacteria	p__Bacteroidetes	c__Bacteroidia	o__Bacteroidales	f__Paraprevotellaceae	g__	s__
Otu1178	1	0	0.00139752	0.0188503	M1	-1.04973	0	Peripheral nodes	k__Bacteria	p__Bacteroidetes	c__Bacteroidia	o__Bacteroidales	f__S24-7	g__	s__
Otu15668	3	6	0.155241	0	M12	0.83666	0	Peripheral nodes	k__Bacteria	p__Firmicutes	c__Clostridia	o__Clostridiales	f__Lachnospiraceae	g__	s__
Otu153	2	0	0.901388	0	M24	NA	NA	NA	k__Bacteria	p__Verrucomicrobia	c__Verruco-5	o__WCHB1-41	f__RFP12	g__	s__
Otu1035	1	0	0.175349	2.77e-18	M13	-0.754378	0	Peripheral nodes	k__Bacteria	p__Bacteroidetes	c__Bacteroidia	o__Bacteroidales	f__	g__	s__
Otu16617	2	0	0.000903771	4.38e-08	M3	-0.288319	0	Peripheral nodes	k__Bacteria	p__Bacteroidetes	c__Bacteroidia	o__Bacteroidales	f__S24-7	g__	s__
Otu8932	22	758	0.00180618	0.87117	M1	1.55976	0.0867769	Peripheral nodes	k__Bacteria	p__Bacteroidetes	c__Bacteroidia	o__Bacteroidales	f__Bacteroidaceae	g__Bacteroides	s__
Otu28833	3	6	0.000885254	5.3e-08	M7	-0.336011	0	Peripheral nodes	k__Bacteria	p__Firmicutes	c__Clostridia	o__Clostridiales	f__Clostridiaceae	g__Clostridium	s__Clostridium_celatum
Otu14009	15	124	0.00175801	0.654288	M1	0.776916	0	Peripheral nodes	k__Bacteria	p__Bacteroidetes	c__Bacteroidia	o__Bacteroidales	f__Bacteroidaceae	g__Bacteroides	s__
Otu1240	23	5398	0.00167085	0.0191985	M5	3.47512	0.15879	Module hubs	k__Bacteria	p__Bacteroidetes	c__Bacteroidia	o__Bacteroidales	f__Paraprevotellaceae	g__CF231	s__
Otu1244	2	2	0.465484	0	M18	0.866025	0	Peripheral nodes	k__Bacteria	p__Bacteroidetes	c__Bacteroidia	o__Bacteroidales	f__	g__	s__
Otu31346	3	0	0.00103685	4.61e-07	M7	-0.336011	0	Peripheral nodes	k__Bacteria	p__Firmicutes	c__Clostridia	o__Clostridiales	f__Clostridiaceae	g__SMB53	s__
Otu99	1	0	0.601214	0	M23	-0.57735	0	Peripheral nodes	k__Bacteria	p__Proteobacteria	c__Gammaproteobacteria	o__Enterobacteriales	f__Enterobacteriaceae	g__Escherichia	s__Escherichia_coli
Otu15885	5	54	0.00141673	0.00226092	M5	-0.194042	0	Peripheral nodes	k__Bacteria	p__Bacteroidetes	c__Bacteroidia	o__Bacteroidales	f__Paraprevotellaceae	g__	s__
Otu8883	2	0	0.188484	3.6e-19	M13	-0.16764	0	Peripheral nodes	k__Bacteria	p__Bacteroidetes	c__Bacteroidia	o__Bacteroidales	f__	g__	s__
Otu9959	12	72	0.00175549	0.544545	M1	0.385493	0	Peripheral nodes	k__Bacteria	p__Bacteroidetes	c__Bacteroidia	o__Bacteroidales	f__Bacteroidaceae	g__Bacteroides	s__
Otu9950	7	556	0.00161859	0.134958	M1	-0.266879	0	Peripheral nodes	k__Bacteria	p__Bacteroidetes	c__Bacteroidia	o__Bacteroidales	f__Bacteroidaceae	g__Bacteroides	s__
Otu619	2	2	0.465484	0	M18	0.866025	0	Peripheral nodes	k__Bacteria	p__Bacteroidetes	c__Bacteroidia	o__Bacteroidales	f__	g__	s__
Otu610	1	0	1.73702	0	M36	NA	NA	NA	k__Bacteria	p__Bacteroidetes	c__Bacteroidia	o__Bacteroidales	f__	g__	s__
Otu612	3	0	0.00134439	4.04e-05	M2	-0.199962	0	Peripheral nodes	k__Bacteria	p__Bacteroidetes	c__Bacteroidia	o__Bacteroidales	f__Prevotellaceae	g__Prevotella	s__
Otu614	6	2170	0.00140366	0.000857795	M4	1.48322	0	Peripheral nodes	k__Bacteria	p__Bacteroidetes	c__Bacteroidia	o__Bacteroidales	f__Prevotellaceae	g__Prevotella	s__
Otu617	12	1735	0.00153208	0.00250412	M6	2.20693	0.152778	Peripheral nodes	k__Bacteria	p__Bacteroidetes	c__Bacteroidia	o__Bacteroidales	f__Prevotellaceae	g__Prevotella	s__Prevotella_stercorea
Otu616	2	0	0.00140296	0.00115788	M6	-0.667887	0	Peripheral nodes	k__Bacteria	p__Bacteroidetes	c__Bacteroidia	o__Bacteroidales	f__	g__	s__
Otu3548	1	0	0.463607	0	M22	-0.57735	0	Peripheral nodes	k__Bacteria	p__Firmicutes	c__Clostridia	o__Clostridiales	f__Veillonellaceae	g__Phascolarctobacterium	s__
Otu9365	5	0	0.00157006	0.246494	M1	-0.527828	0	Peripheral nodes	k__Bacteria	p__Bacteroidetes	c__Bacteroidia	o__Bacteroidales	f__Bacteroidaceae	g__Bacteroides	s__
Otu9364	24	1821	0.00178995	0.887126	M1	1.95119	0	Peripheral nodes	k__Bacteria	p__Bacteroidetes	c__Bacteroidia	o__Bacteroidales	f__Bacteroidaceae	g__Bacteroides	s__
Otu15807	1	0	1.88964	0	M29	NA	NA	NA	k__Bacteria	p__Bacteroidetes	c__Bacteroidia	o__Bacteroidales	f__	g__	s__
Otu26080	1	0	1.72295	0	M37	NA	NA	NA	k__Bacteria	p__Cyanobacteria	c__4C0d-2	o__YS2	f__	g__	s__
Otu1526	2	1526	0.00119748	8.6e-06	M3	-0.288319	0	Peripheral nodes	k__Bacteria	p__Bacteroidetes	c__Bacteroidia	o__Bacteroidales	f__S24-7	g__	s__
Otu1521	1	0	0.00116179	5.61e-06	M2	-0.765372	0	Peripheral nodes	k__Bacteria	p__Bacteroidetes	c__Bacteroidia	o__Bacteroidales	f__	g__	s__
Otu702	7	228	0.00120472	0.00190901	M9	1.33045	0	Peripheral nodes	k__Bacteria	p__Bacteroidetes	c__Bacteroidia	o__Bacteroidales	f__Porphyromonadaceae	g__Parabacteroides	s__
Otu6899	3	23	0.0686502	0	M8	-0.855577	0	Peripheral nodes	k__Bacteria	p__Firmicutes	c__	o__	f__	g__	s__
Otu30001	1	0	1.72295	0	M37	NA	NA	NA	k__Bacteria	p__Cyanobacteria	c__4C0d-2	o__YS2	f__	g__	s__
Otu560	13	1155	0.00131251	0.000161693	M3	4.1518	0	Module hubs	k__Bacteria	p__Bacteroidetes	c__Bacteroidia	o__Bacteroidales	f__Paraprevotellaceae	g__Prevotella	s__
Otu569	2	0	0.283038	4.65e-18	M17	0	0	Peripheral nodes	k__Bacteria	p__Bacteroidetes	c__Bacteroidia	o__Bacteroidales	f__Paraprevotellaceae	g__Prevotella	s__
Otu568	4	1576	0.00165367	0.0143689	M6	-0.348463	0.375	Peripheral nodes	k__Bacteria	p__Bacteroidetes	c__Bacteroidia	o__Bacteroidales	f__Prevotellaceae	g__Prevotella	s__
Otu18123	4	75	0.00130013	5.28e-05	M2	0.0827429	0	Peripheral nodes	k__Bacteria	p__Bacteroidetes	c__Bacteroidia	o__Bacteroidales	f__	g__	s__
Otu8723	1	0	1.31199	0	M38	NA	NA	NA	k__Bacteria	p__Proteobacteria	c__Epsilonproteobacteria	o__Campylobacterales	f__Campylobacteraceae	g__Campylobacter	s__
Otu714	2	0	0.000962049	5.49e-07	M4	-0.353148	0	Peripheral nodes	k__Bacteria	p__Bacteroidetes	c__Bacteroidia	o__Bacteroidales	f__Prevotellaceae	g__Prevotella	s__
Otu717	5	0	0.00120268	0.00197427	M9	0.561747	0	Peripheral nodes	k__Bacteria	p__Bacteroidetes	c__Bacteroidia	o__Bacteroidales	f__Porphyromonadaceae	g__Parabacteroides	s__
Otu1148	5	1325	0.00104043	5.76e-07	M3	0.922622	0	Peripheral nodes	k__Bacteria	p__Bacteroidetes	c__Bacteroidia	o__Bacteroidales	f__S24-7	g__	s__
Otu1142	1	0	1.76523	0	M35	NA	NA	NA	k__Bacteria	p__Bacteroidetes	c__Bacteroidia	o__Bacteroidales	f__RF16	g__	s__
Otu1144	6	468	0.00135584	2.9e-05	M2	0.648153	0	Peripheral nodes	k__Bacteria	p__Bacteroidetes	c__Bacteroidia	o__Bacteroidales	f__	g__	s__
Otu264	2	0	0.964692	0	M24	NA	NA	NA	k__Bacteria	p__Verrucomicrobia	c__Verruco-5	o__WCHB1-41	f__RFP12	g__	s__
Otu10244	1	0	1.9073	0	M28	NA	NA	NA	k__Bacteria	p__Bacteroidetes	c__Bacteroidia	o__Bacteroidales	f__Paraprevotellaceae	g__Prevotella	s__
Otu26337	1	0	1.31199	0	M38	NA	NA	NA	k__Bacteria	p__Proteobacteria	c__Epsilonproteobacteria	o__Campylobacterales	f__Campylobacteraceae	g__Campylobacter	s__
Otu5938	2	0	0.0546657	2.06e-18	M8	-1.1883	0	Peripheral nodes	k__Bacteria	p__Spirochaetes	c__Spirochaetes	o__Sphaerochaetales	f__Sphaerochaetaceae	g__Sphaerochaeta	s__
Otu15924	3	0	0.00164476	0.0031071	M2	-0.199962	0	Peripheral nodes	k__Bacteria	p__Bacteroidetes	c__Bacteroidia	o__Bacteroidales	f__	g__	s__
Otu17225	3	224	0.0013401	2.32e-05	M2	-0.199962	0	Peripheral nodes	k__Bacteria	p__Bacteroidetes	c__Bacteroidia	o__Bacteroidales	f__	g__	s__
Otu10163	1	0	0.00116503	1.29e-06	M2	-0.765372	0	Peripheral nodes	k__Bacteria	p__Bacteroidetes	c__Bacteroidia	o__Bacteroidales	f__Porphyromonadaceae	g__Parabacteroides	s__
Otu7026	3	0	0.00114947	1.79e-05	M3	0.115328	0	Peripheral nodes	k__Bacteria	p__Bacteroidetes	c__Bacteroidia	o__Bacteroidales	f__	g__	s__
Otu5877	8	9	0.081692	1.75e-17	M8	0.808045	0	Peripheral nodes	k__Bacteria	p__Spirochaetes	c__Spirochaetes	o__Sphaerochaetales	f__Sphaerochaetaceae	g__Sphaerochaeta	s__
Otu6997	2	0	0.811162	0	M25	NA	NA	NA	k__Bacteria	p__Firmicutes	c__Clostridia	o__Clostridiales	f__Ruminococcaceae	g__	s__
Otu6993	3	4	0.362503	2.86e-18	M16	1.41421	0	Peripheral nodes	k__Bacteria	p__Firmicutes	c__Clostridia	o__Clostridiales	f__Ruminococcaceae	g__	s__
Otu186	3	446	0.00117283	5.39e-06	M2	-0.199962	0	Peripheral nodes	k__Bacteria	p__Proteobacteria	c__Betaproteobacteria	o__Burkholderiales	f__Alcaligenaceae	g__Sutterella	s__
Otu6049	7	0	0.0758864	4.5e-17	M8	0.475321	0	Peripheral nodes	k__Bacteria	p__Spirochaetes	c__Spirochaetes	o__Sphaerochaetales	f__Sphaerochaetaceae	g__Sphaerochaeta	s__
Otu19724	2	6	0.133608	5.29e-18	M12	0	0	Peripheral nodes	k__Bacteria	p__Firmicutes	c__Clostridia	o__Clostridiales	f__Lachnospiraceae	g__	s__
Otu16328	1	0	0.00108565	4.03e-06	M3	-0.691967	0	Peripheral nodes	k__Bacteria	p__Bacteroidetes	c__Bacteroidia	o__Bacteroidales	f__	g__	s__
Otu16744	3	0	0.00139805	0.00232224	M5	-0.652688	0	Peripheral nodes	k__Bacteria	p__Bacteroidetes	c__Bacteroidia	o__Bacteroidales	f__	g__	s__
Otu24	2	0	0.936593	0	M26	NA	NA	NA	k__Bacteria	p__Firmicutes	c__Bacilli	o__Lactobacillales	f__Lactobacillaceae	g__Lactobacillus	s__
Otu9763	12	1130	0.00151873	0.0110784	M5	1.41122	0	Peripheral nodes	k__Bacteria	p__Bacteroidetes	c__Bacteroidia	o__Bacteroidales	f__Porphyromonadaceae	g__	s__
Otu9764	2	0	0.00166267	0.0928041	M1	-0.919252	0	Peripheral nodes	k__Bacteria	p__Bacteroidetes	c__Bacteroidia	o__Bacteroidales	f__Porphyromonadaceae	g__Parabacteroides	s__
Otu12441	1	0	0.0011949	0.00150506	M9	-0.975665	0	Peripheral nodes	k__Bacteria	p__Bacteroidetes	c__Bacteroidia	o__Bacteroidales	f__Porphyromonadaceae	g__Parabacteroides	s__
Otu1577	1	0	0.000856302	6.12e-10	M10	-0.686496	0	Peripheral nodes	k__Bacteria	p__Fibrobacteres	c__Fibrobacteria	o__Fibrobacterales	f__Fibrobacteraceae	g__Fibrobacter	s__Fibrobacter_succinogenes
Otu29998	5	654	0.00100903	5.76e-07	M7	0.336011	0	Peripheral nodes	k__Bacteria	p__Firmicutes	c__Clostridia	o__Clostridiales	f__	g__	s__
Otu754	10	2586	0.00141579	0.0233155	M9	1.71481	0.32	Peripheral nodes	k__Bacteria	p__Bacteroidetes	c__Bacteroidia	o__Bacteroidales	f__Porphyromonadaceae	g__Parabacteroides	s__
Otu755	17	225	0.00172695	0.704437	M1	1.03786	0	Peripheral nodes	k__Bacteria	p__Bacteroidetes	c__Bacteroidia	o__Bacteroidales	f__Bacteroidaceae	g__Bacteroides	s__
Otu9531	2	0	0.0012979	0.000208174	M6	-0.667887	0	Peripheral nodes	k__Bacteria	p__Bacteroidetes	c__Bacteroidia	o__Bacteroidales	f__Prevotellaceae	g__Prevotella	s__
Otu22144	3	0	0.107086	1.67e-17	M11	-0.19245	0	Peripheral nodes	k__Bacteria	p__Fusobacteria	c__Fusobacteriia	o__Fusobacteriales	f__Fusobacteriaceae	g__	s__
Otu15720	2	0	0.183604	0	M13	-0.16764	0	Peripheral nodes	k__Bacteria	p__Bacteroidetes	c__Bacteroidia	o__Bacteroidales	f__	g__	s__
Otu21170	1	0	0.047473	2.85e-18	M8	-1.52103	0	Peripheral nodes	k__Bacteria	p__Firmicutes	c__Clostridia	o__Clostridiales	f__	g__	s__
Otu7215	2	0	0.00114274	1.63e-05	M3	-0.288319	0	Peripheral nodes	k__Bacteria	p__Bacteroidetes	c__Bacteroidia	o__Bacteroidales	f__Paraprevotellaceae	g__Prevotella	s__
Otu1302	1	0	1.77746	0	M32	NA	NA	NA	k__Bacteria	p__Bacteroidetes	c__Bacteroidia	o__Bacteroidales	f__	g__	s__
Otu6942	2	0	0.253543	0	M16	0	0	Peripheral nodes	k__Bacteria	p__Firmicutes	c__Clostridia	o__Clostridiales	f__Ruminococcaceae	g__	s__
Otu17653	2	0	0.00139514	0.00123852	M5	-0.882011	0	Peripheral nodes	k__Bacteria	p__Bacteroidetes	c__Bacteroidia	o__Bacteroidales	f__	g__	s__
Otu9331	11	12	0.00164435	0.453104	M1	0.255018	0	Peripheral nodes	k__Bacteria	p__Bacteroidetes	c__Bacteroidia	o__Bacteroidales	f__Bacteroidaceae	g__Bacteroides	s__
Otu9802	1	0	0.00121893	5.88e-05	M4	-0.812239	0	Peripheral nodes	k__Bacteria	p__Bacteroidetes	c__Bacteroidia	o__Bacteroidales	f__Prevotellaceae	g__Prevotella	s__
Otu8869	3	139	0.0014299	0.00100206	M6	-0.348463	0	Peripheral nodes	k__Bacteria	p__Bacteroidetes	c__Bacteroidia	o__Bacteroidales	f__Prevotellaceae	g__Prevotella	s__Prevotella_stercorea
Otu1118	8	996	0.00131295	8.9e-05	M3	2.13356	0	Peripheral nodes	k__Bacteria	p__Bacteroidetes	c__Bacteroidia	o__Bacteroidales	f__Paraprevotellaceae	g__Prevotella	s__
Otu10901	2	0	0.00136635	0.0317882	M1	-0.919252	0	Peripheral nodes	k__Bacteria	p__Bacteroidetes	c__Bacteroidia	o__Bacteroidales	f__Bacteroidaceae	g__Bacteroides	s__
Otu9107	2	0	0.00112938	1.06e-05	M3	-0.288319	0	Peripheral nodes	k__Bacteria	p__Bacteroidetes	c__Bacteroidia	o__Bacteroidales	f__	g__	s__
Otu9102	5	0	0.00163581	0.188124	M1	-0.527828	0	Peripheral nodes	k__Bacteria	p__Bacteroidetes	c__Bacteroidia	o__Bacteroidales	f__Bacteroidaceae	g__Bacteroides	s__
Otu5905	7	0	0.0739268	4.18e-17	M8	0.475321	0	Peripheral nodes	k__Bacteria	p__Spirochaetes	c__Spirochaetes	o__Sphaerochaetales	f__Sphaerochaetaceae	g__Sphaerochaeta	s__
Otu8524	2	0	0.273875	0	M17	0	0	Peripheral nodes	k__Bacteria	p__Bacteroidetes	c__Bacteroidia	o__Bacteroidales	f__Paraprevotellaceae	g__Prevotella	s__
Otu9601	1	0	0.00143712	0.0403236	M1	-1.04973	0	Peripheral nodes	k__Bacteria	p__Bacteroidetes	c__Bacteroidia	o__Bacteroidales	f__Bacteroidaceae	g__Bacteroides	s__
Otu16549	1	0	0.00131625	0.000876985	M4	-0.812239	0	Peripheral nodes	k__Bacteria	p__Bacteroidetes	c__Bacteroidia	o__Bacteroidales	f__Paraprevotellaceae	g__CF231	s__
Otu8958	8	3	0.00164061	0.335202	M1	-0.136405	0	Peripheral nodes	k__Bacteria	p__Bacteroidetes	c__Bacteroidia	o__Bacteroidales	f__Bacteroidaceae	g__Bacteroides	s__
Otu7018	3	0	0.206979	9.26e-18	M15	0.236433	0	Peripheral nodes	k__Bacteria	p__Bacteroidetes	c__Bacteroidia	o__Bacteroidales	f__Paraprevotellaceae	g__Prevotella	s__
Otu7014	4	0	0.123403	9.25e-18	M11	0.3849	0	Peripheral nodes	k__Bacteria	p__Fusobacteria	c__Fusobacteriia	o__Fusobacteriales	f__Fusobacteriaceae	g__Fusobacterium	s__
Otu2145	1	0	0.147717	0	M14	-1.60635	0	Peripheral nodes	k__Bacteria	p__Spirochaetes	c__Spirochaetes	o__Spirochaetales	f__Spirochaetaceae	g__Treponema	s__
Otu810	18	677	0.00171623	0.720745	M1	1.16834	0	Peripheral nodes	k__Bacteria	p__Bacteroidetes	c__Bacteroidia	o__Bacteroidales	f__Bacteroidaceae	g__Bacteroides	s__
Otu815	8	4652	0.00151148	0.000277504	M2	1.21356	0	Peripheral nodes	k__Bacteria	p__Bacteroidetes	c__Bacteroidia	o__Bacteroidales	f__Bacteroidaceae	g__Bacteroides	s__
Otu818	19	813	0.0018213	0.731305	M1	1.16834	0.099723	Peripheral nodes	k__Bacteria	p__Bacteroidetes	c__Bacteroidia	o__Bacteroidales	f__Bacteroidaceae	g__Bacteroides	s__

## Sheet: feces
Supplementary Table S3. The microbial co-abundance network modules of the feces in F7 population
name	degree	betweenness_centrality	closeness_centrality	eigenvector_centrality	module	z	p	taxa_roles	Kingdom	Phylum	Class	Order	Family	Genus	Species
Otu7365	8	54	0.00225001	0.179448	M3	0.0961477	0.375	Peripheral nodes	k__Bacteria	p__Firmicutes	c__Clostridia	o__Clostridiales	f__Ruminococcaceae	g__	s__
Otu17279	6	2101	0.00163981	0.000622867	M6	1.43026	0	Peripheral nodes	k__Bacteria	p__Firmicutes	c__Clostridia	o__Clostridiales	f__Clostridiaceae	g__SMB53	s__
Otu11653	3	0	0.0018536	0.0640482	M2	-0.726952	0.444444	Peripheral nodes	k__Bacteria	p__Firmicutes	c__Clostridia	o__Clostridiales	f__Lachnospiraceae	g__Roseburia	s__
Otu10308	1	0	0.00158183	0.00408146	M3	-0.730122	0	Peripheral nodes	k__Bacteria	p__Bacteroidetes	c__Bacteroidia	o__Bacteroidales	f__Prevotellaceae	g__Prevotella	s__
Otu1260	3	0	0.00158789	0.000758554	M6	0.0650119	0	Peripheral nodes	k__Bacteria	p__Bacteroidetes	c__Bacteroidia	o__Bacteroidales	f__	g__	s__
Otu1261	3	0	0.00155154	0.000554435	M4	0.0513504	0	Peripheral nodes	k__Bacteria	p__Bacteroidetes	c__Bacteroidia	o__Bacteroidales	f__	g__	s__
Otu466	1	0	0.00143819	0.00017966	M5	-1.14407	0	Peripheral nodes	k__Bacteria	p__Spirochaetes	c__Spirochaetes	o__Spirochaetales	f__Spirochaetaceae	g__Treponema	s__
Otu468	7	0	0.00140068	0.000311315	M5	0.228814	0	Peripheral nodes	k__Bacteria	p__Spirochaetes	c__Spirochaetes	o__Spirochaetales	f__Spirochaetaceae	g__Treponema	s__
Otu280	2	0	0.755173	1.45e-17	M24	NA	NA	NA	k__Bacteria	p__Spirochaetes	c__Spirochaetes	o__Spirochaetales	f__Spirochaetaceae	g__Treponema	s__
Otu1542	2	1	0.971345	7.39e-18	M13	1.1547	0	Peripheral nodes	k__Bacteria	p__Bacteroidetes	c__Bacteroidia	o__Bacteroidales	f__	g__	s__
Otu719	10	219	0.00206136	0.0811165	M1	0.331899	0	Peripheral nodes	k__Bacteria	p__Bacteroidetes	c__Bacteroidia	o__Bacteroidales	f__Prevotellaceae	g__Prevotella	s__Prevotella_stercorea
Otu2035	3	0	0.00141394	0.000237685	M5	-0.686443	0	Peripheral nodes	k__Bacteria	p__Spirochaetes	c__Spirochaetes	o__Spirochaetales	f__Spirochaetaceae	g__Treponema	s__
Otu11596	1	0	0.00169422	0.0158201	M1	-0.775674	0	Peripheral nodes	k__Bacteria	p__Bacteroidetes	c__Bacteroidia	o__Bacteroidales	f__Prevotellaceae	g__Prevotella	s__
Otu632	49	4361	0.00270747	0.763474	M1	3.0393	0.508122	Module hubs	k__Bacteria	p__Bacteroidetes	c__Bacteroidia	o__Bacteroidales	f__Prevotellaceae	g__Prevotella	s__Prevotella_copri
Otu636	6	580	0.00169833	0.00206517	M4	0.616205	0.444444	Peripheral nodes	k__Bacteria	p__Bacteroidetes	c__Bacteroidia	o__Bacteroidales	f__Bacteroidaceae	g__Bacteroides	s__
Otu635	2	1	0.922254	1e-17	M14	1.1547	0	Peripheral nodes	k__Bacteria	p__Bacteroidetes	c__Bacteroidia	o__Bacteroidales	f__Prevotellaceae	g__Prevotella	s__
Otu639	1	0	1.75131	4.07e-18	M33	NA	NA	NA	k__Bacteria	p__Bacteroidetes	c__Bacteroidia	o__Bacteroidales	f__Porphyromonadaceae	g__Parabacteroides	s__
Otu23490	1	0	0.00186597	0.0340914	M2	-0.853649	0	Peripheral nodes	k__Bacteria	p__Lentisphaerae	c__Lentisphaeria	o__Z20	f__R4-45B	g__	s__
Otu15718	1	0	0.0016669	0.00957465	M2	-0.853649	0	Peripheral nodes	k__Bacteria	p__Firmicutes	c__Clostridia	o__Clostridiales	f__Ruminococcaceae	g__	s__
Otu1356	1	0	1.78859	6.88e-18	M32	NA	NA	NA	k__Bacteria	p__Bacteroidetes	c__Bacteroidia	o__Bacteroidales	f__Paraprevotellaceae	g__	s__
Otu9344	1	0	0.00196318	0.0344012	M1	-0.775674	0	Peripheral nodes	k__Bacteria	p__Bacteroidetes	c__Bacteroidia	o__Bacteroidales	f__Prevotellaceae	g__Prevotella	s__
Otu775	3	534	0.00165784	0.0100083	M22	NA	NA	NA	k__Bacteria	p__Bacteroidetes	c__Bacteroidia	o__Bacteroidales	f__Bacteroidaceae	g__Bacteroides	s__
Otu78	18	4392	0.00180009	0.00399412	M5	2.51696	0.104938	Module hubs	k__Bacteria	p__Spirochaetes	c__Spirochaetes	o__Spirochaetales	f__Spirochaetaceae	g__Treponema	s__
Otu7789	3	0	0.00175451	0.0428579	M2	-0.600254	0	Peripheral nodes	k__Bacteria	p__Firmicutes	c__Clostridia	o__Clostridiales	f__Ruminococcaceae	g__Oscillospira	s__
Otu7788	1	0	1.75131	3.62e-18	M33	NA	NA	NA	k__Bacteria	p__Bacteroidetes	c__Bacteroidia	o__Bacteroidales	f__Porphyromonadaceae	g__Parabacteroides	s__
Otu7780	10	287	0.00187805	0.142278	M2	0.159929	0.18	Peripheral nodes	k__Bacteria	p__Firmicutes	c__Clostridia	o__Clostridiales	f__Lachnospiraceae	g__Roseburia	s__
Otu206	4	0	0.00206875	0.0828604	M1	-0.406483	0	Peripheral nodes	k__Bacteria	p__Verrucomicrobia	c__Verruco-5	o__WCHB1-41	f__	g__	s__
Otu504	10	5167	0.00232851	0.0872412	M1	-0.160356	0.58	Peripheral nodes	k__Bacteria	p__Firmicutes	c__Clostridia	o__	f__	g__	s__
Otu506	4	5	0.18997	2.44e-17	M7	0.944911	0	Peripheral nodes	k__Bacteria	p__Spirochaetes	c__Spirochaetes	o__Sphaerochaetales	f__Sphaerochaetaceae	g__Sphaerochaeta	s__
Otu19860	3	0	0.00131993	3.41e-05	M6	0.0650119	0	Peripheral nodes	k__Bacteria	p__Firmicutes	c__Clostridia	o__Clostridiales	f__	g__	s__
Otu4	7	0	0.00140177	0.00031287	M5	0.228814	0	Peripheral nodes	k__Bacteria	p__Spirochaetes	c__Spirochaetes	o__Spirochaetales	f__Spirochaetaceae	g__Treponema	s__
Otu9676	2	0	0.00181266	0.0312695	M3	-0.730122	0.5	Peripheral nodes	k__Bacteria	p__Bacteroidetes	c__Bacteroidia	o__Bacteroidales	f__Prevotellaceae	g__Prevotella	s__
Otu15798	3	0	0.00208545	0.130487	M2	-0.726952	0.444444	Peripheral nodes	k__Bacteria	p__Firmicutes	c__Clostridia	o__Clostridiales	f__Ruminococcaceae	g__	s__
Otu7040	1	0	0.00173149	0.019463	M2	-0.853649	0	Peripheral nodes	k__Bacteria	p__Lentisphaerae	c__Lentisphaeria	o__Z20	f__R4-45B	g__	s__
Otu7042	11	63	0.00225595	0.326664	M3	0.426655	0.429752	Peripheral nodes	k__Bacteria	p__Firmicutes	c__Clostridia	o__Clostridiales	f__	g__	s__
Otu2825	1	0	0.00143521	0.00018152	M5	-1.14407	0	Peripheral nodes	k__Bacteria	p__Spirochaetes	c__Spirochaetes	o__Spirochaetales	f__Spirochaetaceae	g__Treponema	s__
Otu7755	10	731	0.00187931	0.133031	M2	0.159929	0.18	Peripheral nodes	k__Bacteria	p__Firmicutes	c__Clostridia	o__Clostridiales	f__Ruminococcaceae	g__Oscillospira	s__
Otu7474	1	0	0.000944331	1.55e-07	M8	-0.912871	0	Peripheral nodes	k__Bacteria	p__Firmicutes	c__Clostridia	o__Clostridiales	f__Ruminococcaceae	g__	s__
Otu1163	9	595	0.00211662	0.130314	M1	0.0857717	0.197531	Peripheral nodes	k__Bacteria	p__Bacteroidetes	c__Bacteroidia	o__Bacteroidales	f__	g__	s__
Otu1162	2	0	0.00144103	0.00040094	M4	-0.513504	0	Peripheral nodes	k__Bacteria	p__Bacteroidetes	c__Bacteroidia	o__Bacteroidales	f__Paraprevotellaceae	g__CF231	s__
Otu9157	1	0	1.87406	4.54e-18	M30	NA	NA	NA	k__Bacteria	p__Bacteroidetes	c__Bacteroidia	o__Bacteroidales	f__	g__	s__
Otu15696	1	0	0.00121612	2.38e-05	M10	-0.447214	0	Peripheral nodes	k__Bacteria	p__Firmicutes	c__Clostridia	o__Clostridiales	f__Lachnospiraceae	g__Coprococcus	s__
Otu126	5	54	0.00204225	0.150669	M2	-0.34686	0	Peripheral nodes	k__Bacteria	p__Spirochaetes	c__Spirochaetes	o__Spirochaetales	f__Spirochaetaceae	g__Treponema	s__
Otu15904	2	0	0.00173087	0.0181915	M1	-0.65261	0	Peripheral nodes	k__Bacteria	p__Bacteroidetes	c__Bacteroidia	o__Bacteroidales	f__	g__	s__
Otu10140	33	2052	0.00239224	0.352471	M1	2.91624	0.113866	Module hubs	k__Bacteria	p__Bacteroidetes	c__Bacteroidia	o__Bacteroidales	f__Prevotellaceae	g__Prevotella	s__Prevotella_copri
Otu4819	2	0	0.856164	9.6e-18	M24	NA	NA	NA	k__Bacteria	p__Spirochaetes	c__Spirochaetes	o__Spirochaetales	f__Spirochaetaceae	g__Treponema	s__
Otu7540	2	0	0.00122456	9.24e-05	M8	0	0	Peripheral nodes	k__Bacteria	p__Firmicutes	c__Clostridia	o__Clostridiales	f__Ruminococcaceae	g__	s__
Otu24647	14	95	0.00212012	0.309589	M2	0.666719	0.132653	Peripheral nodes	k__Bacteria	p__Firmicutes	c__Clostridia	o__Clostridiales	f__Ruminococcaceae	g__Oscillospira	s__
Otu1252	3	0	0.00156783	0.00354604	M5	-0.686443	0	Peripheral nodes	k__Bacteria	p__Bacteroidetes	c__Bacteroidia	o__Bacteroidales	f__	g__	s__
Otu1251	1	0	1.87406	3.34e-18	M30	NA	NA	NA	k__Bacteria	p__Bacteroidetes	c__Bacteroidia	o__Bacteroidales	f__	g__	s__
Otu1257	1	0	1.89861	5.84e-18	M29	NA	NA	NA	k__Bacteria	p__Bacteroidetes	c__Bacteroidia	o__Bacteroidales	f__	g__	s__
Otu1259	3	0	0.00148386	0.000974126	M6	0.0650119	0	Peripheral nodes	k__Bacteria	p__Bacteroidetes	c__Bacteroidia	o__Bacteroidales	f__Paraprevotellaceae	g__YRC22	s__
Otu21585	1	0	0.00163313	0.00519545	M1	-0.775674	0	Peripheral nodes	k__Bacteria	p__Firmicutes	c__Clostridia	o__Clostridiales	f__Lachnospiraceae	g__	s__
Otu83	1	0	0.00111265	1.31e-06	M6	-0.845154	0	Peripheral nodes	k__Bacteria	p__Spirochaetes	c__Spirochaetes	o__Spirochaetales	f__Spirochaetaceae	g__Treponema	s__
Otu86	1	0	0.566733	7.48e-18	M17	-0.57735	0	Peripheral nodes	k__Bacteria	p__Spirochaetes	c__Spirochaetes	o__Spirochaetales	f__Spirochaetaceae	g__Treponema	s__
Otu15613	3	7	0.00179433	0.0309617	M1	-0.529547	0	Peripheral nodes	k__Bacteria	p__Bacteroidetes	c__Bacteroidia	o__Bacteroidales	f__Prevotellaceae	g__Prevotella	s__
Otu1874	12	2	0.00134722	0.000421635	M5	1.37289	0	Peripheral nodes	k__Bacteria	p__Spirochaetes	c__Spirochaetes	o__Spirochaetales	f__Spirochaetaceae	g__Treponema	s__
Otu8099	1	0	0.0014745	0.00625347	M2	-0.853649	0	Peripheral nodes	k__Bacteria	p__Firmicutes	c__Clostridia	o__Clostridiales	f__Ruminococcaceae	g__	s__
Otu603	6	3822	0.00202601	0.0664665	M5	-0.457629	0.444444	Peripheral nodes	k__Bacteria	p__Bacteroidetes	c__Bacteroidia	o__Bacteroidales	f__BS11	g__	s__
Otu16147	3	0	0.00205607	0.0811916	M1	-0.529547	0	Peripheral nodes	k__Bacteria	p__Bacteroidetes	c__Bacteroidia	o__Bacteroidales	f__Prevotellaceae	g__	s__
Otu16493	1	0	0.265027	8.13e-18	M9	-0.447214	0	Peripheral nodes	k__Bacteria	p__Bacteroidetes	c__Bacteroidia	o__Bacteroidales	f__	g__	s__
Otu23102	6	0	0.00187743	0.12525	M2	-0.220163	0	Peripheral nodes	k__Bacteria	p__Firmicutes	c__Clostridia	o__Clostridiales	f__Ruminococcaceae	g__Oscillospira	s__
Otu21503	1	0	0.00109174	3.34e-06	M8	-0.912871	0	Peripheral nodes	k__Bacteria	p__Firmicutes	c__Clostridia	o__Clostridiales	f__Ruminococcaceae	g__	s__
Otu15870	16	342	0.00222593	0.346431	M2	0.793416	0.21875	Peripheral nodes	k__Bacteria	p__Firmicutes	c__Clostridia	o__Clostridiales	f__Lachnospiraceae	g__Coprococcus	s__
Otu15872	1	0	0.00181137	0.0338663	M3	-0.730122	0	Peripheral nodes	k__Bacteria	p__Firmicutes	c__Clostridia	o__Clostridiales	f__Lachnospiraceae	g__	s__
Otu688	2	0	0.932836	1.52e-17	M21	NA	NA	NA	k__Bacteria	p__Bacteroidetes	c__Bacteroidia	o__Bacteroidales	f__	g__	s__
Otu1511	4	0	0.00204122	0.0603964	M3	-0.23436	0	Peripheral nodes	k__Bacteria	p__Bacteroidetes	c__Bacteroidia	o__Bacteroidales	f__	g__	s__
Otu7823	5	1	0.00208278	0.0998379	M1	-0.283419	0	Peripheral nodes	k__Bacteria	p__Bacteroidetes	c__Bacteroidia	o__Bacteroidales	f__Prevotellaceae	g__Prevotella	s__
Otu674	3	0	0.00145192	0.000406854	M4	0.0513504	0	Peripheral nodes	k__Bacteria	p__Bacteroidetes	c__Bacteroidia	o__Bacteroidales	f__Prevotellaceae	g__Prevotella	s__
Otu8671	3	136	0.00152266	0.000460127	M4	0.0513504	0	Peripheral nodes	k__Bacteria	p__Bacteroidetes	c__Bacteroidia	o__Bacteroidales	f__Bacteroidaceae	g__Bacteroides	s__
Otu682	11	2432	0.00184181	0.00761233	M4	2.31077	0.46281	Peripheral nodes	k__Bacteria	p__Bacteroidetes	c__Bacteroidia	o__Bacteroidales	f__Prevotellaceae	g__Prevotella	s__
Otu687	5	270	0.00206427	0.0858488	M3	-0.0691062	0	Peripheral nodes	k__Bacteria	p__Bacteroidetes	c__Bacteroidia	o__Bacteroidales	f__Prevotellaceae	g__Prevotella	s__
Otu684	19	1357	0.00231101	0.312094	M1	1.07028	0.282548	Peripheral nodes	k__Bacteria	p__Bacteroidetes	c__Bacteroidia	o__Bacteroidales	f__Prevotellaceae	g__Prevotella	s__
Otu15744	1	0	0.00152306	0.00834834	M2	-0.853649	0	Peripheral nodes	k__Bacteria	p__Firmicutes	c__Clostridia	o__Clostridiales	f__Lachnospiraceae	g__	s__
Otu803	1	0	0.00134391	0.000225972	M11	-0.5	0	Peripheral nodes	k__Bacteria	p__Bacteroidetes	c__Bacteroidia	o__Bacteroidales	f__Prevotellaceae	g__Prevotella	s__
Otu11086	11	11	0.00211298	0.176725	M1	0.454963	0	Peripheral nodes	k__Bacteria	p__Bacteroidetes	c__Bacteroidia	o__Bacteroidales	f__Prevotellaceae	g__Prevotella	s__Prevotella_copri
Otu8733	23	447	0.00225771	0.473373	M2	1.5536	0.226843	Peripheral nodes	k__Bacteria	p__Firmicutes	c__Clostridia	o__Clostridiales	f__Lachnospiraceae	g__Roseburia	s__
Otu7425	5	0	0.00203302	0.122006	M3	-0.0691062	0	Peripheral nodes	k__Bacteria	p__Firmicutes	c__Clostridia	o__Clostridiales	f__Ruminococcaceae	g__	s__
Otu1285	1	0	0.564525	3.62e-18	M18	-0.57735	0	Peripheral nodes	k__Bacteria	p__Bacteroidetes	c__Bacteroidia	o__Bacteroidales	f__	g__	s__
Otu1287	3	0	0.0015777	0.000776027	M6	0.0650119	0	Peripheral nodes	k__Bacteria	p__Bacteroidetes	c__Bacteroidia	o__Bacteroidales	f__Paraprevotellaceae	g__YRC22	s__
Otu1139	12	6182	0.00206912	0.0141815	M6	2.79551	0.416667	Module hubs	k__Bacteria	p__Bacteroidetes	c__Bacteroidia	o__Bacteroidales	f__Paraprevotellaceae	g__YRC22	s__
Otu1136	3	142	0.00167749	0.00428538	M4	-0.513504	0.444444	Peripheral nodes	k__Bacteria	p__Bacteroidetes	c__Bacteroidia	o__Bacteroidales	f__S24-7	g__	s__
Otu1137	1	0	1.82983	3.85e-18	M31	NA	NA	NA	k__Bacteria	p__Bacteroidetes	c__Bacteroidia	o__Bacteroidales	f__p-2534-18B5	g__	s__
Otu16062	6	26	0.0021622	0.077702	M3	0.0961477	0	Peripheral nodes	k__Bacteria	p__Bacteroidetes	c__Bacteroidia	o__Bacteroidales	f__Prevotellaceae	g__	s__
Otu16069	1	0	0.00172117	0.0210316	M2	-0.853649	0	Peripheral nodes	k__Bacteria	p__Firmicutes	c__Clostridia	o__Clostridiales	f__Lachnospiraceae	g__	s__
Otu870	15	17	0.0022907	0.358912	M1	0.454963	0.417778	Peripheral nodes	k__Bacteria	p__Bacteroidetes	c__Bacteroidia	o__Bacteroidales	f__Prevotellaceae	g__Prevotella	s__
Otu117	2	798	0.00161329	0.000638783	M6	-0.390071	0	Peripheral nodes	k__Bacteria	p__Spirochaetes	c__Spirochaetes	o__Spirochaetales	f__Spirochaetaceae	g__Treponema	s__
Otu113	1	0	0.0015471	0.000870392	M1	-0.775674	0	Peripheral nodes	k__Bacteria	p__Firmicutes	c__Erysipelotrichi	o__Erysipelotrichales	f__Erysipelotrichaceae	g__Eubacterium	s__Eubacterium_biforme
Otu13426	5	0	0.00197462	0.0766764	M1	-0.406483	0.32	Peripheral nodes	k__Bacteria	p__Bacteroidetes	c__Bacteroidia	o__Bacteroidales	f__Prevotellaceae	g__Prevotella	s__
Otu1419	1	0	0.00145153	0.00117702	M16	-0.57735	0	Peripheral nodes	k__Bacteria	p__Bacteroidetes	c__Bacteroidia	o__Bacteroidales	f__Paraprevotellaceae	g__CF231	s__
Otu10631	9	2	0.00205516	0.162154	M1	0.208835	0	Peripheral nodes	k__Bacteria	p__Bacteroidetes	c__Bacteroidia	o__Bacteroidales	f__Prevotellaceae	g__Prevotella	s__Prevotella_copri
Otu1200	1	0	1.82983	4.76e-18	M31	NA	NA	NA	k__Bacteria	p__Bacteroidetes	c__Bacteroidia	o__Bacteroidales	f__	g__	s__
Otu795	1	0	1.89861	1.85e-18	M29	NA	NA	NA	k__Bacteria	p__Bacteroidetes	c__Bacteroidia	o__Bacteroidales	f__	g__	s__
Otu18366	2	0	0.00161178	0.00919784	M3	-0.564868	0	Peripheral nodes	k__Bacteria	p__Bacteroidetes	c__Bacteroidia	o__Bacteroidales	f__	g__	s__
Otu9793	5	0	0.00192085	0.0347736	M3	-0.0691062	0	Peripheral nodes	k__Bacteria	p__Bacteroidetes	c__Bacteroidia	o__Bacteroidales	f__	g__	s__
Otu7355	1	0	0.0019837	0.0481029	M3	-0.730122	0	Peripheral nodes	k__Bacteria	p__Firmicutes	c__Clostridia	o__Clostridiales	f__Ruminococcaceae	g__	s__
Otu650	2	268	0.00146124	0.000349942	M4	-0.513504	0	Peripheral nodes	k__Bacteria	p__Bacteroidetes	c__Bacteroidia	o__Bacteroidales	f__Prevotellaceae	g__Prevotella	s__
Otu653	1	0	1.98255	3.43e-18	M25	NA	NA	NA	k__Bacteria	p__Bacteroidetes	c__Bacteroidia	o__Bacteroidales	f__	g__	s__
Otu11504	1	0	0.000996481	1.01e-06	M4	-1.07836	0	Peripheral nodes	k__Bacteria	p__Bacteroidetes	c__Bacteroidia	o__Bacteroidales	f__Prevotellaceae	g__Prevotella	s__
Otu7516	7	123	0.00205399	0.10249	M3	0.261402	0	Peripheral nodes	k__Bacteria	p__Firmicutes	c__Clostridia	o__Clostridiales	f__	g__	s__
Otu24793	3	0	0.00205007	0.0866249	M3	-0.399614	0	Peripheral nodes	k__Bacteria	p__Firmicutes	c__Clostridia	o__Clostridiales	f__	g__	s__
Otu22060	1	0	1.59898	5.85e-18	M36	NA	NA	NA	k__Bacteria	p__Firmicutes	c__Clostridia	o__Clostridiales	f__Ruminococcaceae	g__	s__
Otu21086	28	1123	0.00253236	0.590544	M3	2.07919	0.512755	Peripheral nodes	k__Bacteria	p__Firmicutes	c__Clostridia	o__Clostridiales	f__	g__	s__
Otu9526	1	0	0.00117974	1.84e-05	M4	-1.07836	0	Peripheral nodes	k__Bacteria	p__Bacteroidetes	c__Bacteroidia	o__Bacteroidales	f__Prevotellaceae	g__Prevotella	s__
Otu15738	10	281	0.00191724	0.192192	M2	0.159929	0.18	Peripheral nodes	k__Bacteria	p__Firmicutes	c__Clostridia	o__Clostridiales	f__Lachnospiraceae	g__	s__
Otu15736	2	0	0.00183157	0.02439	M1	-0.65261	0	Peripheral nodes	k__Bacteria	p__Firmicutes	c__Clostridia	o__Clostridiales	f__Lachnospiraceae	g__	s__
Otu7220	1	0	0.00178146	0.0256588	M2	-0.853649	0	Peripheral nodes	k__Bacteria	p__Firmicutes	c__Clostridia	o__Clostridiales	f__Ruminococcaceae	g__	s__
Otu7743	26	1099	0.00237461	0.568691	M2	1.5536	0.387574	Peripheral nodes	k__Bacteria	p__Firmicutes	c__Clostridia	o__Clostridiales	f__Ruminococcaceae	g__Oscillospira	s__
Otu15787	4	0	0.00214063	0.159731	M3	-0.564868	0.5	Peripheral nodes	k__Bacteria	p__Firmicutes	c__Clostridia	o__Clostridiales	f__Ruminococcaceae	g__	s__
Otu7413	1	0	0.00199847	0.0469042	M3	-0.730122	0	Peripheral nodes	k__Bacteria	p__Firmicutes	c__Clostridia	o__Clostridiales	f__Ruminococcaceae	g__	s__
Otu1107	9	1403	0.00187466	0.00915834	M4	1.74591	0.493827	Peripheral nodes	k__Bacteria	p__Bacteroidetes	c__Bacteroidia	o__Bacteroidales	f__	g__	s__
Otu16094	7	176	0.0021803	0.0785168	M3	0.261402	0	Peripheral nodes	k__Bacteria	p__Bacteroidetes	c__Bacteroidia	o__Bacteroidales	f__	g__	s__
Otu17051	1	0	1.6116	5.36e-18	M35	NA	NA	NA	k__Bacteria	p__Firmicutes	c__Clostridia	o__Clostridiales	f__Lachnospiraceae	g__Coprococcus	s__
Otu21823	4	0	0.00202381	0.108058	M3	-0.23436	0	Peripheral nodes	k__Bacteria	p__Firmicutes	c__Clostridia	o__Clostridiales	f__Ruminococcaceae	g__	s__
Otu525	13	73	0.00214884	0.181692	M1	0.70109	0	Peripheral nodes	k__Bacteria	p__Firmicutes	c__Clostridia	o__Clostridiales	f__Veillonellaceae	g__Anaerovibrio	s__
Otu15961	7	140	0.00184483	0.0153441	M1	-0.283419	0.408163	Peripheral nodes	k__Bacteria	p__Firmicutes	c__Clostridia	o__Clostridiales	f__Lachnospiraceae	g__	s__
Otu8766	1	0	0.00181888	0.0178494	M3	-0.730122	0	Peripheral nodes	k__Bacteria	p__Bacteroidetes	c__Bacteroidia	o__Bacteroidales	f__Prevotellaceae	g__Prevotella	s__
Otu29859	1	0	1.91975	4.61e-18	M28	NA	NA	NA	k__Bacteria	p__Firmicutes	c__Clostridia	o__Clostridiales	f__Ruminococcaceae	g__Ruminococcus	s__
Otu1186	3	0	0.00142984	0.00486571	M5	-0.686443	0	Peripheral nodes	k__Bacteria	p__Bacteroidetes	c__	o__	f__	g__	s__
Otu1184	1	0	0.548847	4.36e-18	M18	-0.57735	0	Peripheral nodes	k__Bacteria	p__Bacteroidetes	c__Bacteroidia	o__Bacteroidales	f__	g__	s__
Otu16010	1	0	0.00161178	0.000625791	M6	-0.845154	0	Peripheral nodes	k__Bacteria	p__Bacteroidetes	c__Bacteroidia	o__Bacteroidales	f__Paraprevotellaceae	g__YRC22	s__
Otu16019	5	56	0.00194424	0.121895	M2	-0.34686	0	Peripheral nodes	k__Bacteria	p__Firmicutes	c__Clostridia	o__Clostridiales	f__Lachnospiraceae	g__	s__
Otu9176	1	0	1.97044	2.88e-18	M26	NA	NA	NA	k__Bacteria	p__Cyanobacteria	c__4C0d-2	o__YS2	f__	g__	s__
Otu15671	1	0	1.6116	8.29e-18	M35	NA	NA	NA	k__Bacteria	p__Firmicutes	c__Clostridia	o__Clostridiales	f__Lachnospiraceae	g__Coprococcus	s__
Otu15678	7	279	0.00210479	0.117669	M1	-0.037292	0	Peripheral nodes	k__Bacteria	p__Firmicutes	c__Clostridia	o__Clostridiales	f__Lachnospiraceae	g__	s__
Otu492	2	0	0.0015596	0.00141311	M1	-0.65261	0	Peripheral nodes	k__Bacteria	p__Firmicutes	c__Erysipelotrichi	o__Erysipelotrichales	f__Erysipelotrichaceae	g__	s__
Otu13142	2	534	0.00175449	0.0140257	M15	-0.57735	0.5	Peripheral nodes	k__Bacteria	p__Bacteroidetes	c__Bacteroidia	o__Bacteroidales	f__Prevotellaceae	g__Prevotella	s__
Otu9233	1	0	0.00181155	0.018123	M3	-0.730122	0	Peripheral nodes	k__Bacteria	p__Bacteroidetes	c__Bacteroidia	o__Bacteroidales	f__Prevotellaceae	g__Prevotella	s__
Otu9486	3	534	0.00140404	0.00045638	M4	0.0513504	0	Peripheral nodes	k__Bacteria	p__Bacteroidetes	c__Bacteroidia	o__Bacteroidales	f__Prevotellaceae	g__Prevotella	s__
Otu11837	1	0	0.00122163	3.58e-05	M4	-1.07836	0	Peripheral nodes	k__Bacteria	p__Bacteroidetes	c__Bacteroidia	o__Bacteroidales	f__Prevotellaceae	g__Prevotella	s__
Otu9483	1	0	0.00193052	0.0244872	M1	-0.775674	0	Peripheral nodes	k__Bacteria	p__Bacteroidetes	c__Bacteroidia	o__Bacteroidales	f__Prevotellaceae	g__Prevotella	s__
Otu11643	1	0	0.00106655	1.93e-06	M6	-0.845154	0	Peripheral nodes	k__Bacteria	p__Firmicutes	c__Clostridia	o__Clostridiales	f__Clostridiaceae	g__Clostridium	s__Clostridium_butyricum
Otu884	2	0	0.822639	1.44e-17	M23	NA	NA	NA	k__Bacteria	p__Bacteroidetes	c__Bacteroidia	o__Bacteroidales	f__	g__	s__
Otu18913	8	139	0.00198694	0.0725883	M3	0.426655	0	Peripheral nodes	k__Bacteria	p__Bacteroidetes	c__Bacteroidia	o__Bacteroidales	f__	g__	s__
Otu1852	2	0	0.00143924	0.000197514	M5	-0.915258	0	Peripheral nodes	k__Bacteria	p__Spirochaetes	c__Spirochaetes	o__Spirochaetales	f__Spirochaetaceae	g__Treponema	s__
Otu7842	2	268	0.00167174	0.0208372	M2	-0.726952	0	Peripheral nodes	k__Bacteria	p__Firmicutes	c__Clostridia	o__Clostridiales	f__Ruminococcaceae	g__Oscillospira	s__
Otu662	1	0	0.00173197	0.0172583	M1	-0.775674	0	Peripheral nodes	k__Bacteria	p__Bacteroidetes	c__Bacteroidia	o__Bacteroidales	f__Prevotellaceae	g__Prevotella	s__
Otu599	1	0	0.00149672	0.00621088	M2	-0.853649	0	Peripheral nodes	k__Bacteria	p__Bacteroidetes	c__Bacteroidia	o__Bacteroidales	f__	g__	s__
Otu626	2	268	0.00138942	0.000682453	M15	1.1547	0	Peripheral nodes	k__Bacteria	p__Bacteroidetes	c__Bacteroidia	o__Bacteroidales	f__Prevotellaceae	g__Prevotella	s__
Otu60	8	2	0.00139101	0.000332966	M5	0.457629	0	Peripheral nodes	k__Bacteria	p__Spirochaetes	c__Spirochaetes	o__Spirochaetales	f__Spirochaetaceae	g__Treponema	s__
Otu63	7	0	0.00141403	0.000302169	M5	0.228814	0	Peripheral nodes	k__Bacteria	p__Spirochaetes	c__Spirochaetes	o__Spirochaetales	f__Spirochaetaceae	g__Treponema	s__
Otu67	2	1	0.698959	1.34e-17	M20	1.1547	0	Peripheral nodes	k__Bacteria	p__Firmicutes	c__Bacilli	o__Lactobacillales	f__Lactobacillaceae	g__Lactobacillus	s__Lactobacillus_reuteri
Otu7776	7	5	0.00207246	0.148807	M1	-0.037292	0	Peripheral nodes	k__Bacteria	p__Bacteroidetes	c__Bacteroidia	o__Bacteroidales	f__Prevotellaceae	g__Prevotella	s__
Otu15816	12	2269	0.00195478	0.0200657	M1	0.208835	0.402778	Peripheral nodes	k__Bacteria	p__Firmicutes	c__Clostridia	o__Clostridiales	f__Lachnospiraceae	g__Blautia	s__
Otu10495	2	268	0.00118211	1.98e-05	M4	-0.513504	0	Peripheral nodes	k__Bacteria	p__Bacteroidetes	c__Bacteroidia	o__Bacteroidales	f__Prevotellaceae	g__Prevotella	s__
Otu482	4	5	0.199275	6.11e-18	M7	0.944911	0	Peripheral nodes	k__Bacteria	p__Spirochaetes	c__Spirochaetes	o__Sphaerochaetales	f__Sphaerochaetaceae	g__Sphaerochaeta	s__
Otu483	1	0	0.122561	3.7e-18	M7	-1.0394	0	Peripheral nodes	k__Bacteria	p__Spirochaetes	c__Spirochaetes	o__Sphaerochaetales	f__Sphaerochaetaceae	g__Sphaerochaeta	s__
Otu485	1	0	0.00120547	2.5e-05	M10	-0.447214	0	Peripheral nodes	k__Bacteria	p__Firmicutes	c__Erysipelotrichi	o__Erysipelotrichales	f__Erysipelotrichaceae	g__	s__
Otu488	42	2160	0.00242082	0.757254	M3	1.74869	0.5	Peripheral nodes	k__Bacteria	p__Firmicutes	c__Clostridia	o__Clostridiales	f__Veillonellaceae	g__Anaerovibrio	s__
Otu8695	1	0	0.00201923	0.0452485	M3	-0.730122	0	Peripheral nodes	k__Bacteria	p__Cyanobacteria	c__4C0d-2	o__YS2	f__	g__	s__
Otu510	11	218	0.00216374	0.282228	M2	0.0332321	0.396694	Peripheral nodes	k__Bacteria	p__Firmicutes	c__Clostridia	o__Clostridiales	f__Veillonellaceae	g__Anaerovibrio	s__
Otu19856	1	0	0.00133909	2.74e-05	M6	-0.845154	0	Peripheral nodes	k__Bacteria	p__Firmicutes	c__Clostridia	o__Clostridiales	f__Clostridiaceae	g__SMB53	s__
Otu7750	18	303	0.0023489	0.491146	M2	0.793416	0.37037	Peripheral nodes	k__Bacteria	p__Firmicutes	c__Clostridia	o__Clostridiales	f__	g__	s__
Otu3835	1	0	0.00144521	0.00017532	M5	-1.14407	0	Peripheral nodes	k__Bacteria	p__Spirochaetes	c__Spirochaetes	o__Spirochaetales	f__Spirochaetaceae	g__Treponema	s__
Otu6710	1	0	0.00175936	0.0378432	M3	-0.730122	0	Peripheral nodes	k__Bacteria	p__Firmicutes	c__Clostridia	o__Clostridiales	f__Veillonellaceae	g__Anaerovibrio	s__
Otu1159	1	0	0.617627	7.17e-18	M14	-0.57735	0	Peripheral nodes	k__Bacteria	p__Bacteroidetes	c__Bacteroidia	o__Bacteroidales	f__Paraprevotellaceae	g__Prevotella	s__
Otu1150	4	6	0.45754	2.3e-17	M9	1.78885	0	Peripheral nodes	k__Bacteria	p__Bacteroidetes	c__Bacteroidia	o__Bacteroidales	f__Paraprevotellaceae	g__YRC22	s__
Otu1151	4	535	0.00185406	0.0244556	M16	1.1547	0.625	Connectors	k__Bacteria	p__Bacteroidetes	c__Bacteroidia	o__Bacteroidales	f__Paraprevotellaceae	g__CF231	s__
Otu858	3	0	0.00148059	0.00437343	M5	-0.686443	0	Peripheral nodes	k__Bacteria	p__Bacteroidetes	c__Bacteroidia	o__Bacteroidales	f__	g__	s__
Otu856	1	0	0.00179819	0.0348523	M3	-0.730122	0	Peripheral nodes	k__Bacteria	p__Bacteroidetes	c__Bacteroidia	o__Bacteroidales	f__Prevotellaceae	g__Prevotella	s__
Otu853	1	0	0.00115649	3.18e-05	M15	-0.57735	0	Peripheral nodes	k__Bacteria	p__Bacteroidetes	c__Bacteroidia	o__Bacteroidales	f__Prevotellaceae	g__Prevotella	s__
Otu9142	14	72	0.00212751	0.211358	M1	0.70109	0.132653	Peripheral nodes	k__Bacteria	p__Bacteroidetes	c__Bacteroidia	o__Bacteroidales	f__Prevotellaceae	g__Prevotella	s__Prevotella_copri
Otu15688	1	0	0.00122157	2.31e-05	M10	-0.447214	0	Peripheral nodes	k__Bacteria	p__Firmicutes	c__Clostridia	o__Clostridiales	f__Lachnospiraceae	g__Dorea	s__
Otu15689	4	0	0.00200556	0.137343	M2	-0.600254	0.375	Peripheral nodes	k__Bacteria	p__Firmicutes	c__Clostridia	o__Clostridiales	f__Ruminococcaceae	g__Ruminococcus	s__
Otu139	1	0	1.5223	6.38e-18	M37	NA	NA	NA	k__Bacteria	p__Firmicutes	c__Clostridia	o__Clostridiales	f__Veillonellaceae	g__Phascolarctobacterium	s__
Otu735	8	21	0.00205145	0.157372	M1	-0.160356	0.40625	Peripheral nodes	k__Bacteria	p__Bacteroidetes	c__Bacteroidia	o__Bacteroidales	f__Prevotellaceae	g__Prevotella	s__
Otu1750	12	15	0.00135706	0.000410883	M5	1.37289	0	Peripheral nodes	k__Bacteria	p__Spirochaetes	c__Spirochaetes	o__Spirochaetales	f__Spirochaetaceae	g__Treponema	s__
Otu15914	44	2311.5	0.00257299	0.907607	M2	2.18709	0.577479	Peripheral nodes	k__Bacteria	p__Firmicutes	c__Clostridia	o__Clostridiales	f__Lachnospiraceae	g__	s__
Otu8913	4	0	0.00194434	0.126002	M2	-0.473557	0	Peripheral nodes	k__Bacteria	p__Firmicutes	c__Clostridia	o__Clostridiales	f__Ruminococcaceae	g__	s__
Otu6988	1	0	0.00180689	0.0194243	M1	-0.775674	0	Peripheral nodes	k__Bacteria	p__Firmicutes	c__Clostridia	o__Clostridiales	f__Ruminococcaceae	g__	s__
Otu6989	1	0	0.00177611	0.0259678	M2	-0.853649	0	Peripheral nodes	k__Bacteria	p__Firmicutes	c__Clostridia	o__Clostridiales	f__Ruminococcaceae	g__	s__
Otu6981	23	474	0.00228761	0.512987	M2	1.4269	0.287335	Peripheral nodes	k__Bacteria	p__Firmicutes	c__Clostridia	o__Clostridiales	f__Ruminococcaceae	g__	s__
Otu6986	21	299.5	0.00232414	0.415725	M3	1.58343	0.408163	Peripheral nodes	k__Bacteria	p__Firmicutes	c__Clostridia	o__Clostridiales	f__Ruminococcaceae	g__	s__
Otu30330	1	0	0.00106445	1.95e-06	M6	-0.845154	0	Peripheral nodes	k__Bacteria	p__Firmicutes	c__Clostridia	o__Clostridiales	f__Clostridiaceae	g__Clostridium	s__Clostridium_celatum
Otu783	3	0	0.00144338	0.00041718	M4	0.0513504	0	Peripheral nodes	k__Bacteria	p__Bacteroidetes	c__Bacteroidia	o__Bacteroidales	f__Prevotellaceae	g__Prevotella	s__
Otu785	1	0	0.649435	2.82e-18	M13	-0.57735	0	Peripheral nodes	k__Bacteria	p__Bacteroidetes	c__Bacteroidia	o__Bacteroidales	f__	g__	s__
Otu28665	11	613	0.0020651	0.231441	M2	0.286627	0.165289	Peripheral nodes	k__Bacteria	p__Firmicutes	c__Clostridia	o__Clostridiales	f__Lachnospiraceae	g__Roseburia	s__
Otu24347	1	0	0.00204468	0.043265	M3	-0.730122	0	Peripheral nodes	k__Bacteria	p__Firmicutes	c__Clostridia	o__Clostridiales	f__Ruminococcaceae	g__	s__
Otu4564	2	0	0.841184	2.04e-17	M24	NA	NA	NA	k__Bacteria	p__Spirochaetes	c__Spirochaetes	o__Spirochaetales	f__Spirochaetaceae	g__Treponema	s__
Otu2595	1	0	0.551572	5.18e-18	M17	-0.57735	0	Peripheral nodes	k__Bacteria	p__Spirochaetes	c__Spirochaetes	o__Spirochaetales	f__Spirochaetaceae	g__Treponema	s__
Otu679	7	55	0.00221709	0.234838	M2	-0.34686	0.408163	Peripheral nodes	k__Bacteria	p__Bacteroidetes	c__Bacteroidia	o__Bacteroidales	f__Prevotellaceae	g__Prevotella	s__
Otu673	3	0	0.00206162	0.0675727	M3	-0.399614	0	Peripheral nodes	k__Bacteria	p__Bacteroidetes	c__Bacteroidia	o__Bacteroidales	f__Prevotellaceae	g__Prevotella	s__
Otu22497	2	0	0.00184713	0.0548346	M2	-0.726952	0	Peripheral nodes	k__Bacteria	p__Firmicutes	c__Clostridia	o__Clostridiales	f__Ruminococcaceae	g__Oscillospira	s__
Otu38	11	15	0.00138679	0.000371922	M5	1.14407	0	Peripheral nodes	k__Bacteria	p__Spirochaetes	c__Spirochaetes	o__Spirochaetales	f__Spirochaetaceae	g__Treponema	s__
Otu37	2	1	0.838574	1.41e-17	M17	1.1547	0	Peripheral nodes	k__Bacteria	p__Spirochaetes	c__Spirochaetes	o__Spirochaetales	f__Spirochaetaceae	g__Treponema	s__
Otu7749	2	73	0.00159564	0.00624406	M4	-1.07836	0.5	Peripheral nodes	k__Bacteria	p__Firmicutes	c__Clostridia	o__Clostridiales	f__Ruminococcaceae	g__Oscillospira	s__
Otu7748	13	23	0.0019565	0.323411	M2	0.540021	0.142012	Peripheral nodes	k__Bacteria	p__Firmicutes	c__Clostridia	o__Clostridiales	f__Ruminococcaceae	g__Oscillospira	s__
Otu15868	3	268	0.00186507	0.0613369	M2	-0.600254	0	Peripheral nodes	k__Bacteria	p__Firmicutes	c__Clostridia	o__Clostridiales	f__Ruminococcaceae	g__Ruminococcus	s__Ruminococcus_flavefaciens
Otu15869	1	0	0.00144919	0.001517	M3	-0.730122	0	Peripheral nodes	k__Bacteria	p__Proteobacteria	c__Gammaproteobacteria	o__Aeromonadales	f__Succinivibrionaceae	g__	s__
Otu1509	1	0	1.78859	6.61e-18	M32	NA	NA	NA	k__Bacteria	p__Bacteroidetes	c__Bacteroidia	o__Bacteroidales	f__	g__	s__
Otu7839	1	0	0.00133543	0.00101006	M2	-0.853649	0	Peripheral nodes	k__Bacteria	p__Firmicutes	c__Clostridia	o__Clostridiales	f__Ruminococcaceae	g__Oscillospira	s__
Otu5995	1	0	0.1287	4.07e-18	M7	-1.0394	0	Peripheral nodes	k__Bacteria	p__Spirochaetes	c__Spirochaetes	o__Sphaerochaetales	f__Sphaerochaetaceae	g__Sphaerochaeta	s__
Otu8666	7	7	0.00193692	0.181104	M2	-0.0934652	0	Peripheral nodes	k__Bacteria	p__Firmicutes	c__Clostridia	o__Clostridiales	f__	g__	s__
Otu19824	17	70	0.00221914	0.445616	M2	0.793416	0.290657	Peripheral nodes	k__Bacteria	p__Firmicutes	c__Clostridia	o__Clostridiales	f__Ruminococcaceae	g__	s__
Otu9879	2	0	0.00194101	0.0417325	M1	-0.65261	0	Peripheral nodes	k__Bacteria	p__Bacteroidetes	c__Bacteroidia	o__Bacteroidales	f__Prevotellaceae	g__Prevotella	s__
Otu22626	1	0	1.59898	7.22e-18	M36	NA	NA	NA	k__Bacteria	p__Firmicutes	c__Clostridia	o__Clostridiales	f__Ruminococcaceae	g__	s__
Otu1296	1	0	1.98255	2.85e-18	M25	NA	NA	NA	k__Bacteria	p__Bacteroidetes	c__Bacteroidia	o__Bacteroidales	f__	g__	s__
Otu1292	3	0	0.00153226	0.000876368	M6	0.0650119	0	Peripheral nodes	k__Bacteria	p__Bacteroidetes	c__Bacteroidia	o__Bacteroidales	f__Paraprevotellaceae	g__YRC22	s__
Otu7982	2	0	0.00174708	0.017594	M1	-0.65261	0	Peripheral nodes	k__Bacteria	p__Bacteroidetes	c__Bacteroidia	o__Bacteroidales	f__	g__	s__
Otu1127	10	18	0.00206014	0.179073	M1	0.208835	0.18	Peripheral nodes	k__Bacteria	p__Bacteroidetes	c__Bacteroidia	o__Bacteroidales	f__Prevotellaceae	g__Prevotella	s__
Otu1126	2	0	0.00192745	0.0427129	M1	-0.65261	0	Peripheral nodes	k__Bacteria	p__Bacteroidetes	c__Bacteroidia	o__Bacteroidales	f__Prevotellaceae	g__Prevotella	s__Prevotella_copri
Otu242	6	0	0.00141087	0.000289826	M5	0	0	Peripheral nodes	k__Bacteria	p__Spirochaetes	c__Spirochaetes	o__Spirochaetales	f__Spirochaetaceae	g__Treponema	s__
Otu9116	1	0	0.0013544	0.000217026	M11	-0.5	0	Peripheral nodes	k__Bacteria	p__Bacteroidetes	c__Bacteroidia	o__Bacteroidales	f__Prevotellaceae	g__Prevotella	s__
Otu19661	18	1347	0.00228333	0.425098	M3	0.426655	0.493827	Peripheral nodes	k__Bacteria	p__Firmicutes	c__Clostridia	o__Clostridiales	f__	g__	s__
Otu19662	25	164	0.00226564	0.595164	M3	0.922417	0.4928	Peripheral nodes	k__Bacteria	p__Firmicutes	c__Clostridia	o__Clostridiales	f__Mogibacteriaceae	g__	s__
Otu9639	28	1061.5	0.00240116	0.452283	M1	1.93173	0.303571	Peripheral nodes	k__Bacteria	p__Bacteroidetes	c__Bacteroidia	o__Bacteroidales	f__Prevotellaceae	g__Prevotella	s__Prevotella_copri
Otu9090	1	0	0.636659	2.95e-18	M12	-0.57735	0	Peripheral nodes	k__Bacteria	p__Bacteroidetes	c__Bacteroidia	o__Bacteroidales	f__Porphyromonadaceae	g__Parabacteroides	s__
Otu8941	1	0	1.97044	8.77e-19	M26	NA	NA	NA	k__Bacteria	p__Cyanobacteria	c__4C0d-2	o__YS2	f__	g__	s__
Otu1399	6	7	0.00152135	0.00100428	M6	1.43026	0	Peripheral nodes	k__Bacteria	p__Bacteroidetes	c__Bacteroidia	o__Bacteroidales	f__Paraprevotellaceae	g__YRC22	s__
Otu1393	14	3150	0.00216601	0.106417	M3	0.922417	0.357143	Peripheral nodes	k__Bacteria	p__Bacteroidetes	c__Bacteroidia	o__Bacteroidales	f__	g__	s__
Otu7009	7	8	0.00207632	0.134162	M3	0.261402	0	Peripheral nodes	k__Bacteria	p__Firmicutes	c__Clostridia	o__Clostridiales	f__	g__	s__
Otu7001	10	56	0.00215213	0.273667	M2	0.0332321	0.32	Peripheral nodes	k__Bacteria	p__Firmicutes	c__Clostridia	o__Clostridiales	f__Ruminococcaceae	g__	s__
Otu7007	17	216	0.00224511	0.434459	M2	0.793416	0.304498	Peripheral nodes	k__Bacteria	p__Firmicutes	c__Clostridia	o__Clostridiales	f__Christensenellaceae	g__	s__
Otu2869	10	2	0.0013681	0.000379493	M5	0.915258	0	Peripheral nodes	k__Bacteria	p__Spirochaetes	c__Spirochaetes	o__Spirochaetales	f__Spirochaetaceae	g__Treponema	s__
Otu9913	3	0	0.00197458	0.0537336	M1	-0.65261	0.444444	Peripheral nodes	k__Bacteria	p__Bacteroidetes	c__Bacteroidia	o__Bacteroidales	f__Prevotellaceae	g__Prevotella	s__
Otu985	2	0	0.00207046	0.0575691	M1	-0.65261	0	Peripheral nodes	k__Bacteria	p__Bacteroidetes	c__Bacteroidia	o__Bacteroidales	f__Prevotellaceae	g__Prevotella	s__
Otu983	4	0	0.00202187	0.110016	M1	-0.406483	0	Peripheral nodes	k__Bacteria	p__Bacteroidetes	c__Bacteroidia	o__Bacteroidales	f__Prevotellaceae	g__Prevotella	s__Prevotella_copri
Otu21563	14	496.5	0.00231587	0.299787	M3	1.08767	0.244898	Peripheral nodes	k__Bacteria	p__Firmicutes	c__Clostridia	o__Clostridiales	f__Ruminococcaceae	g__	s__
Otu10102	1	0	0.0019721	0.033835	M1	-0.775674	0	Peripheral nodes	k__Bacteria	p__Bacteroidetes	c__Bacteroidia	o__Bacteroidales	f__Prevotellaceae	g__Prevotella	s__Prevotella_copri
Otu645	5	573	0.00208291	0.0615833	M1	-0.529547	0.56	Peripheral nodes	k__Bacteria	p__Bacteroidetes	c__Bacteroidia	o__Bacteroidales	f__Prevotellaceae	g__Prevotella	s__
Otu643	31	2143	0.00247116	0.382236	M3	1.08767	0.511967	Peripheral nodes	k__Bacteria	p__Bacteroidetes	c__Bacteroidia	o__Bacteroidales	f__Prevotellaceae	g__Prevotella	s__
Otu640	49	4487	0.00263976	0.546798	M1	4.26994	0.244898	Module hubs	k__Bacteria	p__Bacteroidetes	c__Bacteroidia	o__Bacteroidales	f__Prevotellaceae	g__Prevotella	s__Prevotella_copri
Otu7087	2	0	0.00161993	0.0114367	M3	-0.564868	0	Peripheral nodes	k__Bacteria	p__Firmicutes	c__Clostridia	o__Clostridiales	f__	g__	s__
Otu7088	5	0	0.00211791	0.181516	M3	-0.399614	0.48	Peripheral nodes	k__Bacteria	p__Firmicutes	c__Clostridia	o__Clostridiales	f__	g__	s__
Otu7509	1	0	0.00172193	0.0172746	M3	-0.730122	0	Peripheral nodes	k__Bacteria	p__Firmicutes	c__Clostridia	o__Clostridiales	f__	g__	s__
Otu8158	20	1152	0.00224205	0.398479	M3	1.41818	0.42	Peripheral nodes	k__Bacteria	p__Firmicutes	c__Clostridia	o__Clostridiales	f__	g__	s__
Otu17787	1	0	0.00139734	0.00138728	M16	-0.57735	0	Peripheral nodes	k__Bacteria	p__Bacteroidetes	c__Bacteroidia	o__Bacteroidales	f__Paraprevotellaceae	g__CF231	s__
Otu478	4	5	0.196109	1.21e-17	M7	0.944911	0	Peripheral nodes	k__Bacteria	p__Spirochaetes	c__Spirochaetes	o__Sphaerochaetales	f__Sphaerochaetaceae	g__Sphaerochaeta	s__
Otu906	4	0	0.00214779	0.160579	M3	-0.564868	0.5	Peripheral nodes	k__Bacteria	p__Bacteroidetes	c__Bacteroidia	o__Bacteroidales	f__Prevotellaceae	g__Prevotella	s__
Otu7004	21	730	0.00215241	0.480008	M2	1.30021	0.253968	Peripheral nodes	k__Bacteria	p__Firmicutes	c__Clostridia	o__Clostridiales	f__	g__	s__
Otu15708	8	2177	0.00218126	0.042004	M1	-0.037292	0.21875	Peripheral nodes	k__Bacteria	p__Firmicutes	c__Clostridia	o__Clostridiales	f__Lachnospiraceae	g__	s__
Otu15702	4	0	0.00197052	0.0588921	M1	-0.406483	0	Peripheral nodes	k__Bacteria	p__Firmicutes	c__Clostridia	o__Clostridiales	f__Ruminococcaceae	g__	s__
Otu15707	6	801	0.00125943	4.18e-05	M6	1.43026	0	Peripheral nodes	k__Bacteria	p__Firmicutes	c__Clostridia	o__Clostridiales	f__Clostridiaceae	g__	s__
Otu15704	18	1233	0.00244045	0.420152	M1	0.208835	0.549383	Peripheral nodes	k__Bacteria	p__Firmicutes	c__Clostridia	o__Clostridiales	f__Lachnospiraceae	g__	s__
Otu7239	2	268	0.00108283	3.56e-06	M8	0	0	Peripheral nodes	k__Bacteria	p__Firmicutes	c__Clostridia	o__Clostridiales	f__Ruminococcaceae	g__	s__
Otu1322	2	0	0.977708	3.14e-18	M19	NA	NA	NA	k__Bacteria	p__Bacteroidetes	c__Bacteroidia	o__Bacteroidales	f__RF16	g__	s__
Otu1321	1	0	0.258031	4.87e-18	M9	-0.447214	0	Peripheral nodes	k__Bacteria	p__Bacteroidetes	c__Bacteroidia	o__Bacteroidales	f__Paraprevotellaceae	g__YRC22	s__
Otu769	28	473	0.00233671	0.46557	M1	1.93173	0.303571	Peripheral nodes	k__Bacteria	p__Bacteroidetes	c__Bacteroidia	o__Bacteroidales	f__Prevotellaceae	g__Prevotella	s__Prevotella_copri
Otu43	1	0	0.00109943	1.41e-06	M6	-0.845154	0	Peripheral nodes	k__Bacteria	p__Spirochaetes	c__Spirochaetes	o__Spirochaetales	f__Spirochaetaceae	g__Treponema	s__
Otu42	1	0	0.44285	7.78e-18	M20	-0.57735	0	Peripheral nodes	k__Bacteria	p__Firmicutes	c__Bacilli	o__Lactobacillales	f__Lactobacillaceae	g__Lactobacillus	s__
Otu217	2	0	0.00178106	0.0564473	M3	-0.564868	0	Peripheral nodes	k__Bacteria	p__Proteobacteria	c__Betaproteobacteria	o__Burkholderiales	f__Alcaligenaceae	g__Sutterella	s__
Otu17047	1	0	1.91975	4.25e-18	M28	NA	NA	NA	k__Bacteria	p__Firmicutes	c__Clostridia	o__Clostridiales	f__Ruminococcaceae	g__Ruminococcus	s__
Otu15788	8	1511	0.00183043	0.0116053	M1	-0.160356	0.40625	Peripheral nodes	k__Bacteria	p__Firmicutes	c__Clostridia	o__Clostridiales	f__Lachnospiraceae	g__	s__
Otu8771	2	0	0.00177537	0.0312693	M1	-0.65261	0	Peripheral nodes	k__Bacteria	p__Bacteroidetes	c__Bacteroidia	o__Bacteroidales	f__Prevotellaceae	g__Prevotella	s__
Otu15909	5	3	0.00190141	0.128087	M2	-0.473557	0.32	Peripheral nodes	k__Bacteria	p__Firmicutes	c__Clostridia	o__Clostridiales	f__Lachnospiraceae	g__	s__
Otu1173	1	0	0.00161704	0.00274088	M1	-0.775674	0	Peripheral nodes	k__Bacteria	p__Bacteroidetes	c__Bacteroidia	o__Bacteroidales	f__Paraprevotellaceae	g__	s__
Otu10291	2	0	0.00195075	0.0405506	M1	-0.65261	0	Peripheral nodes	k__Bacteria	p__Bacteroidetes	c__Bacteroidia	o__Bacteroidales	f__Prevotellaceae	g__Prevotella	s__
Otu153	1	0	1.95312	9.72e-19	M27	NA	NA	NA	k__Bacteria	p__Verrucomicrobia	c__Verruco-5	o__WCHB1-41	f__RFP12	g__	s__
Otu156	1	0	1.95312	1.1e-18	M27	NA	NA	NA	k__Bacteria	p__Verrucomicrobia	c__Verruco-5	o__WCHB1-41	f__RFP12	g__	s__
Otu13392	1	0	0.00179508	0.018746	M3	-0.730122	0	Peripheral nodes	k__Bacteria	p__Bacteroidetes	c__Bacteroidia	o__Bacteroidales	f__Prevotellaceae	g__Prevotella	s__
Otu8060	1	0	0.00154679	0.00222538	M3	-0.730122	0	Peripheral nodes	k__Bacteria	p__Firmicutes	c__Clostridia	o__Clostridiales	f__Lachnospiraceae	g__	s__
Otu28833	1	0	0.00106716	1.92e-06	M6	-0.845154	0	Peripheral nodes	k__Bacteria	p__Firmicutes	c__Clostridia	o__Clostridiales	f__Clostridiaceae	g__Clostridium	s__Clostridium_celatum
Otu16409	1	0	0.00166223	0.00479133	M3	-0.730122	0	Peripheral nodes	k__Bacteria	p__Bacteroidetes	c__Bacteroidia	o__Bacteroidales	f__	g__	s__
Otu9492	1	0	0.00161099	0.00621793	M1	-0.775674	0	Peripheral nodes	k__Bacteria	p__Bacteroidetes	c__Bacteroidia	o__Bacteroidales	f__	g__	s__
Otu1244	2	0	0.891583	1.17e-17	M21	NA	NA	NA	k__Bacteria	p__Bacteroidetes	c__Bacteroidia	o__Bacteroidales	f__	g__	s__
Otu1247	2	0	0.913743	1.24e-17	M19	NA	NA	NA	k__Bacteria	p__Bacteroidetes	c__Bacteroidia	o__Bacteroidales	f__	g__	s__
Otu15767	18	1621	0.0023048	0.167511	M1	1.31641	0	Peripheral nodes	k__Bacteria	p__Firmicutes	c__Clostridia	o__Clostridiales	f__Ruminococcaceae	g__Faecalibacterium	s__Faecalibacterium_prausnitzii
Otu90	3	0	0.00129319	3.73e-05	M6	0.0650119	0	Peripheral nodes	k__Bacteria	p__Firmicutes	c__Bacilli	o__Turicibacterales	f__Turicibacteraceae	g__Turicibacter	s__
Otu619	2	0	0.861772	8.33e-18	M21	NA	NA	NA	k__Bacteria	p__Bacteroidetes	c__Bacteroidia	o__Bacteroidales	f__	g__	s__
Otu610	7	2937.5	0.00252529	0.172258	M3	-0.399614	0.693878	Connectors	k__Bacteria	p__Bacteroidetes	c__Bacteroidia	o__Bacteroidales	f__	g__	s__
Otu612	4	801	0.00167071	0.00482483	M11	1.5	0.375	Peripheral nodes	k__Bacteria	p__Bacteroidetes	c__Bacteroidia	o__Bacteroidales	f__Prevotellaceae	g__Prevotella	s__
Otu615	2	0	0.870246	7.07e-18	M23	NA	NA	NA	k__Bacteria	p__Bacteroidetes	c__Bacteroidia	o__Bacteroidales	f__RF16	g__	s__
Otu614	2	9	0.00157209	0.00371632	M4	-1.07836	0.5	Peripheral nodes	k__Bacteria	p__Bacteroidetes	c__Bacteroidia	o__Bacteroidales	f__Prevotellaceae	g__Prevotella	s__
Otu617	8	296	0.00213449	0.121181	M1	-0.037292	0.21875	Peripheral nodes	k__Bacteria	p__Bacteroidetes	c__Bacteroidia	o__Bacteroidales	f__Prevotellaceae	g__Prevotella	s__Prevotella_stercorea
Otu616	9	570	0.00204442	0.0752815	M1	-0.037292	0.345679	Peripheral nodes	k__Bacteria	p__Bacteroidetes	c__Bacteroidia	o__Bacteroidales	f__	g__	s__
Otu3548	1	0	1.5223	3.92e-18	M37	NA	NA	NA	k__Bacteria	p__Firmicutes	c__Clostridia	o__Clostridiales	f__Veillonellaceae	g__Phascolarctobacterium	s__
Otu1374	1	0	0.265111	3.93e-18	M9	-0.447214	0	Peripheral nodes	k__Bacteria	p__Bacteroidetes	c__Bacteroidia	o__Bacteroidales	f__Paraprevotellaceae	g__YRC22	s__
Otu29760	5	0	0.00193192	0.117427	M2	-0.473557	0.32	Peripheral nodes	k__Bacteria	p__Firmicutes	c__Clostridia	o__Clostridiales	f__Lachnospiraceae	g__Roseburia	s__
Otu7765	2	268	0.00180286	0.034827	M3	-0.564868	0	Peripheral nodes	k__Bacteria	p__Proteobacteria	c__Gammaproteobacteria	o__Aeromonadales	f__Succinivibrionaceae	g__Succinivibrio	s__
Otu1521	5	275	0.00149211	0.000749599	M4	1.18106	0	Peripheral nodes	k__Bacteria	p__Bacteroidetes	c__Bacteroidia	o__Bacteroidales	f__	g__	s__
Otu702	2	1	0.941265	9.2e-18	M12	1.1547	0	Peripheral nodes	k__Bacteria	p__Bacteroidetes	c__Bacteroidia	o__Bacteroidales	f__Porphyromonadaceae	g__Parabacteroides	s__
Otu6893	18	738	0.00225555	0.450753	M2	0.793416	0.345679	Peripheral nodes	k__Bacteria	p__Firmicutes	c__Clostridia	o__Clostridiales	f__	g__	s__
Otu6896	1	0	0.00170125	0.0209517	M2	-0.853649	0	Peripheral nodes	k__Bacteria	p__Firmicutes	c__Clostridia	o__Clostridiales	f__	g__	s__
Otu11536	1	0	0.00128777	0.000513131	M2	-0.853649	0	Peripheral nodes	k__Bacteria	p__Firmicutes	c__Clostridia	o__Clostridiales	f__Lachnospiraceae	g__Roseburia	s__
Otu568	21	1022	0.00232817	0.362745	M1	1.07028	0.380952	Peripheral nodes	k__Bacteria	p__Bacteroidetes	c__Bacteroidia	o__Bacteroidales	f__Prevotellaceae	g__Prevotella	s__
Otu16397	1	0	0.257832	4.24e-18	M9	-0.447214	0	Peripheral nodes	k__Bacteria	p__Bacteroidetes	c__Bacteroidia	o__Bacteroidales	f__Paraprevotellaceae	g__YRC22	s__
Otu15771	1	0	0.00121914	2.34e-05	M10	-0.447214	0	Peripheral nodes	k__Bacteria	p__Firmicutes	c__Clostridia	o__Clostridiales	f__Lachnospiraceae	g__Ruminococcus	s__Ruminococcus_gnavus
Otu28888	1	0	0.00147814	0.00277011	M2	-0.853649	0	Peripheral nodes	k__Bacteria	p__Firmicutes	c__Clostridia	o__Clostridiales	f__Lachnospiraceae	g__	s__
Otu2116	3	0	0.00142316	0.000230576	M5	-0.686443	0	Peripheral nodes	k__Bacteria	p__Spirochaetes	c__Spirochaetes	o__Spirochaetales	f__Spirochaetaceae	g__Treponema	s__
Otu18123	2	0	0.00154536	0.0107054	M3	-0.564868	0	Peripheral nodes	k__Bacteria	p__Bacteroidetes	c__Bacteroidia	o__Bacteroidales	f__	g__	s__
Otu8723	1	0	1.65728	8.12e-18	M34	NA	NA	NA	k__Bacteria	p__Proteobacteria	c__Epsilonproteobacteria	o__Campylobacterales	f__Campylobacteraceae	g__Campylobacter	s__
Otu714	6	125	0.00142024	0.000539909	M4	1.74591	0	Peripheral nodes	k__Bacteria	p__Bacteroidetes	c__Bacteroidia	o__Bacteroidales	f__Prevotellaceae	g__Prevotella	s__
Otu716	6	0	0.00207177	0.138599	M1	-0.160356	0	Peripheral nodes	k__Bacteria	p__Bacteroidetes	c__Bacteroidia	o__Bacteroidales	f__Prevotellaceae	g__Prevotella	s__
Otu27470	2	268	0.001619	0.0100375	M2	-0.726952	0	Peripheral nodes	k__Bacteria	p__Firmicutes	c__Clostridia	o__Clostridiales	f__Lachnospiraceae	g__Roseburia	s__
Otu1142	2	1	0.834864	1.66e-17	M18	1.1547	0	Peripheral nodes	k__Bacteria	p__Bacteroidetes	c__Bacteroidia	o__Bacteroidales	f__RF16	g__	s__
Otu1140	2	0	0.919794	1.13e-17	M19	NA	NA	NA	k__Bacteria	p__Bacteroidetes	c__Bacteroidia	o__Bacteroidales	f__RF16	g__	s__
Otu1147	3	0	0.00154929	0.00154194	M1	-0.65261	0.444444	Peripheral nodes	k__Bacteria	p__Firmicutes	c__Erysipelotrichi	o__Erysipelotrichales	f__Erysipelotrichaceae	g__Bulleidia	s__Bulleidia_p-1630-c5
Otu1144	1	0	0.645703	7.23e-19	M13	-0.57735	0	Peripheral nodes	k__Bacteria	p__Bacteroidetes	c__Bacteroidia	o__Bacteroidales	f__	g__	s__
Otu30712	5	1066	0.00146095	0.00053607	M10	1.78885	0.32	Peripheral nodes	k__Bacteria	p__Firmicutes	c__Clostridia	o__Clostridiales	f__Lachnospiraceae	g__Dorea	s__
Otu108	4	0	0.00191027	0.112585	M2	-0.473557	0	Peripheral nodes	k__Bacteria	p__Tenericutes	c__Mollicutes	o__RF39	f__	g__	s__
Otu26337	1	0	1.65728	7.49e-18	M34	NA	NA	NA	k__Bacteria	p__Proteobacteria	c__Epsilonproteobacteria	o__Campylobacterales	f__Campylobacteraceae	g__Campylobacter	s__
Otu20944	11	0	0.0021975	0.332846	M2	0.159929	0.31405	Peripheral nodes	k__Bacteria	p__Firmicutes	c__Clostridia	o__Clostridiales	f__Christensenellaceae	g__	s__
Otu7399	1	0	0.00181217	0.0433844	M2	-0.853649	0	Peripheral nodes	k__Bacteria	p__Firmicutes	c__Clostridia	o__Clostridiales	f__	g__	s__
Otu7394	1	0	0.00147153	0.00631198	M2	-0.853649	0	Peripheral nodes	k__Bacteria	p__Firmicutes	c__Clostridia	o__Clostridiales	f__Ruminococcaceae	g__	s__
Otu7027	21	525.5	0.00225567	0.503012	M2	1.04681	0.362812	Peripheral nodes	k__Bacteria	p__Firmicutes	c__Clostridia	o__Clostridiales	f__Ruminococcaceae	g__	s__
Otu5877	3	0	0.168455	1.72e-17	M7	0.283473	0	Peripheral nodes	k__Bacteria	p__Spirochaetes	c__Spirochaetes	o__Sphaerochaetales	f__Sphaerochaetaceae	g__Sphaerochaeta	s__
Otu6995	65	8670.5	0.00281994	1	M3	4.88851	0.591716	Module hubs	k__Bacteria	p__Firmicutes	c__Clostridia	o__Clostridiales	f__Ruminococcaceae	g__	s__
Otu6994	21	113	0.00222338	0.563703	M2	1.04681	0.362812	Peripheral nodes	k__Bacteria	p__Firmicutes	c__Clostridia	o__Clostridiales	f__Ruminococcaceae	g__	s__
Otu6990	6	77	0.00220251	0.188446	M2	-0.473557	0.444444	Peripheral nodes	k__Bacteria	p__Firmicutes	c__Clostridia	o__Clostridiales	f__Ruminococcaceae	g__	s__
Otu6993	4	800	0.001279	7.73e-05	M8	1.82574	0	Peripheral nodes	k__Bacteria	p__Firmicutes	c__Clostridia	o__Clostridiales	f__Ruminococcaceae	g__	s__
Otu21373	1	0	0.00184676	0.0355065	M2	-0.853649	0	Peripheral nodes	k__Bacteria	p__Firmicutes	c__Clostridia	o__Clostridiales	f__Christensenellaceae	g__	s__
Otu2920	5	0	0.00141128	0.000275076	M5	-0.228814	0	Peripheral nodes	k__Bacteria	p__Spirochaetes	c__Spirochaetes	o__Spirochaetales	f__Spirochaetaceae	g__Treponema	s__
Otu186	10	30	0.00229282	0.328811	M3	0.0961477	0.54	Peripheral nodes	k__Bacteria	p__Proteobacteria	c__Betaproteobacteria	o__Burkholderiales	f__Alcaligenaceae	g__Sutterella	s__
Otu9271	9	178	0.00228286	0.200993	M1	-0.283419	0.493827	Peripheral nodes	k__Bacteria	p__Bacteroidetes	c__Bacteroidia	o__Bacteroidales	f__Prevotellaceae	g__Prevotella	s__
Otu7880	8	3	0.00209695	0.156482	M1	0.0857717	0	Peripheral nodes	k__Bacteria	p__Bacteroidetes	c__Bacteroidia	o__Bacteroidales	f__Prevotellaceae	g__Prevotella	s__
Otu16640	2	0	0.00160472	0.000687045	M6	-0.390071	0	Peripheral nodes	k__Bacteria	p__Bacteroidetes	c__Bacteroidia	o__Bacteroidales	f__	g__	s__
Otu19724	2	268	0.0020142	0.0460976	M3	-0.564868	0	Peripheral nodes	k__Bacteria	p__Firmicutes	c__Clostridia	o__Clostridiales	f__Lachnospiraceae	g__	s__
Otu27503	13	4	0.00201596	0.29194	M2	0.540021	0.142012	Peripheral nodes	k__Bacteria	p__Firmicutes	c__Clostridia	o__Clostridiales	f__Lachnospiraceae	g__Roseburia	s__
Otu24	1	0	0.491642	7.05e-18	M20	-0.57735	0	Peripheral nodes	k__Bacteria	p__Firmicutes	c__Bacilli	o__Lactobacillales	f__Lactobacillaceae	g__Lactobacillus	s__
Otu1572	1	0	0.00155766	0.0071091	M1	-0.775674	0	Peripheral nodes	k__Bacteria	p__Bacteroidetes	c__Bacteroidia	o__Bacteroidales	f__	g__	s__
Otu29998	1	0	0.00132154	2.94e-05	M6	-0.845154	0	Peripheral nodes	k__Bacteria	p__Firmicutes	c__Clostridia	o__Clostridiales	f__	g__	s__
Otu7115	10	411	0.00205658	0.157244	M3	0.757163	0	Peripheral nodes	k__Bacteria	p__Firmicutes	c__Clostridia	o__Clostridiales	f__	g__	s__
Otu754	1	0	0.61862	3.09e-18	M12	-0.57735	0	Peripheral nodes	k__Bacteria	p__Bacteroidetes	c__Bacteroidia	o__Bacteroidales	f__Porphyromonadaceae	g__Parabacteroides	s__
Otu755	2	0	0.0013489	0.000471981	M22	NA	NA	NA	k__Bacteria	p__Bacteroidetes	c__Bacteroidia	o__Bacteroidales	f__Bacteroidaceae	g__Bacteroides	s__
Otu15727	3	170	0.00184131	0.0109563	M1	-0.65261	0.444444	Peripheral nodes	k__Bacteria	p__Firmicutes	c__Clostridia	o__Clostridiales	f__Lachnospiraceae	g__Coprococcus	s__Coprococcus_catus
Otu1302	2	0	0.817194	5.19e-18	M23	NA	NA	NA	k__Bacteria	p__Bacteroidetes	c__Bacteroidia	o__Bacteroidales	f__	g__	s__
Otu1308	1	0	0.00134619	0.000224016	M11	-0.5	0	Peripheral nodes	k__Bacteria	p__Bacteroidetes	c__Bacteroidia	o__Bacteroidales	f__	g__	s__
Otu6942	5	1320	0.00156923	0.00151025	M8	0	0.48	Peripheral nodes	k__Bacteria	p__Firmicutes	c__Clostridia	o__Clostridiales	f__Ruminococcaceae	g__	s__
Otu9802	13	364	0.00216239	0.212649	M1	0.578026	0.142012	Peripheral nodes	k__Bacteria	p__Bacteroidetes	c__Bacteroidia	o__Bacteroidales	f__Prevotellaceae	g__Prevotella	s__
Otu8869	1	0	0.00160784	0.00598385	M1	-0.775674	0	Peripheral nodes	k__Bacteria	p__Bacteroidetes	c__Bacteroidia	o__Bacteroidales	f__Prevotellaceae	g__Prevotella	s__Prevotella_stercorea
Otu747	16	170	0.00223375	0.220072	M1	0.947217	0.117188	Peripheral nodes	k__Bacteria	p__Bacteroidetes	c__Bacteroidia	o__Bacteroidales	f__Prevotellaceae	g__Prevotella	s__
Otu743	1	0	0.61207	5.22e-18	M14	-0.57735	0	Peripheral nodes	k__Bacteria	p__Bacteroidetes	c__Bacteroidia	o__Bacteroidales	f__Prevotellaceae	g__Prevotella	s__
Otu7401	11	163	0.00223099	0.226687	M3	0.591909	0.297521	Peripheral nodes	k__Bacteria	p__Firmicutes	c__Clostridia	o__Clostridiales	f__Ruminococcaceae	g__	s__
Otu1116	2	0	0.00193176	0.041963	M1	-0.65261	0	Peripheral nodes	k__Bacteria	p__Bacteroidetes	c__Bacteroidia	o__Bacteroidales	f__Prevotellaceae	g__Prevotella	s__Prevotella_copri
Otu1111	3	417	0.00169391	0.00478655	M4	-0.513504	0.444444	Peripheral nodes	k__Bacteria	p__Bacteroidetes	c__Bacteroidia	o__Bacteroidales	f__	g__	s__
Otu232	4	0	0.00215024	0.149339	M2	-0.726952	0.625	Connectors	k__Bacteria	p__Spirochaetes	c__Spirochaetes	o__Spirochaetales	f__Spirochaetaceae	g__Treponema	s__
Otu691	7	0	0.00206663	0.138765	M1	-0.037292	0	Peripheral nodes	k__Bacteria	p__Bacteroidetes	c__Bacteroidia	o__Bacteroidales	f__Prevotellaceae	g__Prevotella	s__
Otu5905	1	0	0.131671	1.64e-18	M7	-1.0394	0	Peripheral nodes	k__Bacteria	p__Spirochaetes	c__Spirochaetes	o__Sphaerochaetales	f__Sphaerochaetaceae	g__Sphaerochaeta	s__
Otu21440	1	0	0.00160963	0.00683164	M3	-0.730122	0	Peripheral nodes	k__Bacteria	p__Firmicutes	c__Clostridia	o__Clostridiales	f__	g__	s__
Otu7019	39	4754	0.00248992	0.788909	M2	2.82057	0.381328	Module hubs	k__Bacteria	p__Firmicutes	c__Clostridia	o__Clostridiales	f__Christensenellaceae	g__	s__
Otu7012	11	5	0.00222245	0.352726	M2	0.0332321	0.396694	Peripheral nodes	k__Bacteria	p__Firmicutes	c__Clostridia	o__Clostridiales	f__Christensenellaceae	g__	s__
Otu7010	12	1116.5	0.00214704	0.221788	M2	0.0332321	0.486111	Peripheral nodes	k__Bacteria	p__Firmicutes	c__Clostridia	o__Clostridiales	f__Ruminococcaceae	g__	s__
Otu7017	52	1460	0.00243489	0.955344	M2	3.83415	0.411243	Module hubs	k__Bacteria	p__Firmicutes	c__Clostridia	o__Clostridiales	f__Christensenellaceae	g__	s__
Otu2145	3	535	0.00131317	2.97e-05	M6	0.0650119	0	Peripheral nodes	k__Bacteria	p__Spirochaetes	c__Spirochaetes	o__Spirochaetales	f__Spirochaetaceae	g__Treponema	s__
Otu17510	2	0	0.00147873	0.000462228	M4	-0.513504	0	Peripheral nodes	k__Bacteria	p__Bacteroidetes	c__Bacteroidia	o__Bacteroidales	f__	g__	s__
Otu21346	7	23	0.00212856	0.190908	M3	-0.23436	0.489796	Peripheral nodes	k__Bacteria	p__Firmicutes	c__Clostridia	o__Clostridiales	f__Ruminococcaceae	g__Oscillospira	s__
Otu810	2	0	0.00129952	0.000558795	M22	NA	NA	NA	k__Bacteria	p__Bacteroidetes	c__Bacteroidia	o__Bacteroidales	f__Bacteroidaceae	g__Bacteroides	s__
Otu815	4	64	0.00153746	0.000617315	M4	0.616205	0	Peripheral nodes	k__Bacteria	p__Bacteroidetes	c__Bacteroidia	o__Bacteroidales	f__Bacteroidaceae	g__Bacteroides	s__
